# Supplementary material for: Global genome mining-driven discovery of an unusual biosynthetic logic for fungal polyketide–terpenoid hybrids
Source: Royal Society of Chemistry journal article supplement (doi:10.1039/d3sc06001b), 2024-01-01
Supplement: d3sc06001b1.pdf [file d3sc06001b1.pdf]

*Supporting Information for*

## **Global genome mining-driven discovery of an unusual biosynthetic logic for fungal polyketide–terpenoid hybrids**

Dexiu Yan and Yudai Matsuda\*

Department of Chemistry, City University of Hong Kong, Tat Chee Avenue, Kowloon, Hong Kong SAR, China

\*Correspondence should be addressed to Yudai Matsuda (ymatsuda@cityu.edu.hk).

### **Table of Contents**

|                                            |                |
|--------------------------------------------|----------------|
| <b>Supplementary Materials and Methods</b> | <b>S2-S7</b>   |
| <b>Supplementary Tables S1-S6</b>          | <b>S8-S12</b>  |
| <b>Supplementary Figures S1-S48</b>        | <b>S13-S43</b> |
| <b>Supplementary Data</b>                  | <b>S44-S47</b> |
| <b>Supplementary References</b>            | <b>S48</b>     |

## Supplementary Materials and Methods

### General experimental procedures

Organic solvents were purchased from Anaqua (Hong Kong) Co. Ltd., and other chemicals were purchased from Wako Chemicals Ltd., Thermo Fisher Scientific, and J&K Scientific Ltd. unless noted otherwise. Oligonucleotide primers (Table S4) were purchased from Beijing Genomics Institute. PCR was performed using a T100™ Thermal Cycler (Bio-Rad Laboratories, Inc.) with Phanta Max Super-Fidelity DNA Polymerase (Vazyme Biotech Co., Ltd). Preparative HPLC was performed on a Waters 1525 Binary HPLC pump with a 2998 photodiode array detector (Waters Corporation). Flash chromatography was performed using an Isolera Spektra One flash purification system (Biotage). NMR spectra were obtained at 600 MHz (<sup>1</sup>H)/150 MHz (<sup>13</sup>C) or 400 MHz (<sup>1</sup>H)/100 MHz (<sup>13</sup>C) with a Bruker Ascend Avance III HD spectrometer or Bruker Avance III spectrometer, and chemical shifts were recorded with reference to solvent signals (<sup>1</sup>H NMR: CDCl<sub>3</sub> 7.26 ppm, CD<sub>3</sub>OD 3.31 ppm, acetone-*d*<sub>6</sub> 2.05 ppm, DMSO-*d*<sub>6</sub> 2.50 ppm; <sup>13</sup>C NMR: CDCl<sub>3</sub> 77.0 ppm, CD<sub>3</sub>OD 49.0 ppm, acetone-*d*<sub>6</sub> 29.8 ppm, DMSO-*d*<sub>6</sub> 39.5 ppm). HR-ESI-MS spectra were obtained with SCIEX X500R Q-TOF mass spectrometer. Samples for LC-MS analysis were injected into a SCIEX ExionLC AD System with a SCIEX X500R Q-TOF mass spectrometer, using a Luna® Omega C18 column (1.6 μm, 100 Å, 2.1 x 100 mm; Phenomenex). Optical rotations were measured with a P-2000 Digital Polarimeter (JASCO Corporation).

### Strains

*Annulohyphoxylon moriforme* CBS 123579 and *Aspergillus pseudotamarii* CBS 117625 were purchased from the Westerdijk Fungal Biodiversity Institute, whereas *Colletotrichum orchidophilum* IMI 309357 was obtained from the Centre for Agriculture and Bioscience International. *Aspergillus oryzae* NSARU1 (*niaD*<sup>-</sup>, *sC*<sup>-</sup>, *ΔargB*, *adeA*<sup>-</sup>, *pyrG*<sup>-</sup>)<sup>1</sup> was utilized as the fungal heterologous expression host. Standard DNA engineering was performed with *Escherichia coli* DH5α (Takara Bio Inc).

### Phylogenetic analysis of Pyr4 homologues

The sequences of known Pyr4-family terpene cyclases and their homologues identified in this study were first aligned using MUSCLE<sup>2</sup> (version 5.1), and the conserved sequences were extracted with Gblocks<sup>3</sup> (version 0.91b). A maximum likelihood (ML) phylogenetic tree was generated with FastTree<sup>4</sup> (version 2.1.11), and the resultant phylogeny was used as a starting tree to infer an ML tree using RaxML<sup>5</sup> (version 8.0.0) under the LG+G+F model, as identified by ProtTest<sup>6</sup> (version 3.4.2). The Pyr4 homologues of bacterial origin were used as outgroups. The phylogenetic tree was visualized with Geneious Prime 2023.2.1 (<https://www.geneious.com>).

## Construction of fungal transformation plasmids

To construct fungal expression plasmids for *A. oryzae*, each gene in the *mfm* cluster, *ocdTC*, or *psetPT* was first amplified from the genomic DNA (gDNA) of *A. moriforme* CBS 123579, *C. orchidophilum* IMI 309357, or *A. pseudotamarii* CBS 117625, respectively, with the primers described in Table S4 and Table S5. Each amplified DNA fragment was then introduced into the pTAex3 vector<sup>7</sup> except for *mfmA*, whereas *mfmA* was ligated into the pPyrG vector,<sup>1</sup> using a ClonExpress Ultra One Step Cloning Kit (Vazyme Biotech Co., Ltd). Subsequently, DNA fragments harboring the *amyB* promoter (*PamyB*) and the *amyB* terminator (*TamyB*) were amplified from the pTAex3-based plasmids, and further introduced into the already constructed single gene-containing vector or another vector, pAdeA,<sup>8</sup> and pAdeA-HR,<sup>9</sup> The expression plasmids for the *mfmD* and *psetPT* variants were created by PCR method with the mutation primers, using an In-Fusion<sup>®</sup> Snap Assembly Master Mix (Takara Bio Inc). Detailed methods for the construction of the plasmids used in this study are summarized in Table S5.

## Fungal transformation

For the heterologous reconstitution of the *mfm* pathway, *Aspergillus oryzae* NSARU1 was first transformed with pTAex3-*mfmB* by the previously reported protoplast–polyethylene glycol method.<sup>10</sup> The resultant transformant was further transformed twice using the two plasmids, pPyrG-*mfmA*+*C*+*D*+*E* and pAdeA-*mfmF*+*G*+*H*+*J*, yielding the nine gene-expressing *A. oryzae* strain. When constructing the strains lacking one or more genes, plasmids with a fewer number of genes were used.

For the characterization of *ocdTC*, the *A. oryzae* strain with *mfmB* was transformed twice using the two plasmids, pPyrG-*mfmA*+*C*+*E*+*F* and pAdeA-*mfmD*+*ocdTC*.

To analyze the functions of PsetPT, as well as the MfmD and PsetPT variants, the *A. oryzae* strain with *mfmB* was initially transformed using pPyrG-*mfmA*+*C*+*E*+*F*, and the resultant five gene-expressing strain was transformed using a pAdeA-HR-based plasmid harboring either a wild-type or variant prenyltransferase gene by the protoplast–polyethylene glycol method coupled with CRISPR-Cas9-guided homologous recombination.<sup>1, 9, 11</sup>

The transformants created in this study and the plasmids used for the transformation are given in Table S6.

## LC-MS analysis of metabolites derived from *A. oryzae* transformants

To analyze the metabolites produced by each *A. oryzae* transformant, the transformants were cultivated on a DPY agar plate [2% dextrin, 1% hipolypepton (Nihon Pharmaceutical Co., Ltd.), 0.5% yeast extract, 0.5% KH<sub>2</sub>PO<sub>4</sub>, 0.05% MgSO<sub>4</sub>•7H<sub>2</sub>O, and 1.5% agar] for around one week at 30 °C. A small piece of fungal mycelia and agar was cut from the plate, soaked in ethyl acetate, and extracted using an ultrasonic bath. The ethyl acetate layer was transferred to a new tube, and the solvent was removed using nitrogen gas flow. The residue was dissolved in methanol or acetonitrile and analyzed by LC-MS, with a solvent system of 20 mM formic acid (solvent A) and acetonitrile containing 20 mM formic acid (solvent B), at a flow rate of 0.4 mL/min and a

column temperature of 40 °C. HPLC separation was performed using a linear gradient from 10:90 (solvent B/solvent A) to 100:0 for 10 min, 100:0 for the following 3 min, and a linear gradient from 100:0 to 10:90 within the following 2.0 min, and then 10:90 for 2.5 min of equilibrium.

### **Isolation of each metabolite from *A. oryzae* transformants**

To isolate each metabolite, *A. oryzae* transformants were cultivated on DPY agar plates (the volume of medium in one plate is *ca.* 20 mL) for around one week at 30 °C. The resulting fungal cultures, including agar medium, were crushed into small pieces, soaked in ethyl acetate, and extracted twice using an ultrasonic bath. After filtration, ethyl acetate was removed in vacuo. The resultant crude extract was fractionated by flash chromatography or open silica gel chromatography. The fractions containing the targeted compound were subjected to a reduction reaction and/or were further purified by preparative HPLC or open-column chromatography. For preparative HPLC, a COSMOSIL 5C<sub>18</sub>-AR-II column (10 i.d. x 250 mm, Nacalai Tesque, Inc) was used for the purification of **4** (which was obtained by the reduction of **5**), **8'**, and **9'**, whereas an XBridge BEH C18 OBD Prep Column (100 Å, 5 µm, 19 i.d. x 250 mm; Waters Corporation) for the purification of **3** and **4** (which was isolated from the *A. oryzae* transformant).

For the reduction reaction, the partially purified substrate was initially dissolved in methanol on ice. Subsequently, an excess amount of sodium borohydride (NaBH<sub>4</sub>) was gradually added to the solution until the reaction was completed. The pH value of the reaction mixture was then adjusted to 7 using hydrochloric acid. The solvent was removed in vacuo, and the resulting residue was dissolved in water and extracted using ethyl acetate. The reduced product was finally purified by open-column chromatography or preparative HPLC.

Purification methods for each compound are described in detail below.

#### **Purification condition for compound **1'**:**

The extract of *A. oryzae/mfmBACDEFGHJ* cultivated on 150 DPY agar plates (1.8 g) was subjected to open silica gel chromatography and eluted stepwise using hexane:acetone gradient (6:1 to 2:1). Fractions containing **1** (184.0 mg) were then concentrated and reduced using 0.4 g of NaBH<sub>4</sub>. The reaction product was further purified by open silica gel chromatography (hexane: acetone 12:1) to yield 63.2 mg of **1'**.

#### **Purification condition for 5,7-dihydroxy-4-(hydroxymethyl)-6-methylphthalide (**3**):**

The extract of *A. oryzae/mfmBAC* cultivated on 150 DPY agar plates (0.89 g) was subjected to flash chromatography and eluted stepwise using dichloromethane:ethyl acetate gradient (100:0 to 0:100). Fractions that contained **3** (43.3 mg) were then purified by reverse-phase preparative HPLC (13% aqueous acetonitrile, 8.0 mL/min) to yield 11.2 mg of **3**.



**Purification condition for 5-hydroxy-4-(hydroxymethyl)-7-methoxy-6-methylphthalide (4):**

The extract of *A. oryzae/mfmBACE* cultivated on 60 DPY agar plates (0.86 g) was subjected to flash chromatography and eluted stepwise using dichloromethane:ethyl acetate gradient (100:0 to 0:100). Fractions that contained **4** (126.5 mg) were then purified by reverse-phase preparative HPLC (19% aqueous acetonitrile, 8.0 mL/min) to yield of 35.9 mg of **4**.

In addition, **4** was also obtained from the reduction of **5**. The extract of *A. oryzae/mfmBACEF* cultivated on 100 DPY agar plates (0.76 g) was subjected to open silica gel chromatography and eluted stepwise using hexane:acetone gradient (4:1 to 2:1). Fractions containing **5** (29.5 mg) were then concentrated and reduced using 0.1 g of NaBH<sub>4</sub>. The reaction product was further purified by reverse-phase preparative HPLC (20% aqueous acetonitrile, 3.0 mL/min) to yield of 4.5 mg of **4**. The <sup>1</sup>H NMR spectrum of the reduced product is identical to that of **4** isolated from the *A. oryzae* transformant (Figure S22).

**Purification condition for compound 6':**

The extract of *A. oryzae/mfmBACDEFGJ* cultivated on 100 DPY agar plates (0.47 g) was subjected to open silica gel chromatography and eluted stepwise using hexane:acetone gradient (9:1 to 7:1). Fractions containing **6** (96.0 mg) were then concentrated and reduced using 1.0 g of NaBH<sub>4</sub>. The reaction product was further purified by open silica gel chromatography (hexane:acetone 15:1) to yield 6.8 mg of **6'**.

**Purification condition for compound 7':**

The extract of *A. oryzae/mfmBACEFD+ocdTC* cultivated on 200 DPY agar plates (2.4 g) was subjected to open silica gel chromatography and eluted stepwise using hexane:acetone gradient (9:1 to 2:1). Fractions containing **7** (82.3 mg) were then concentrated and reduced using 0.2 g of NaBH<sub>4</sub>. The reaction product was further purified by open silica gel chromatography (hexane:acetone:1) to yield 19.2 mg of **7'**.

**Purification condition for compound 8':**

The extract of *A. oryzae/mfmBACEF+psetPT* cultivated on 100 DPY agar plates (0.47 g) was subjected to open silica gel chromatography and eluted stepwise using hexane:acetone gradient (9:1 to 1:1). Fractions containing **8** (33.0 mg) were then concentrated and reduced using 0.6 g of NaBH<sub>4</sub>. The reaction product was further purified by reverse-phase preparative HPLC (40% aqueous acetonitrile, 3.0 mL/min) to yield 2.9 mg of **8'**.

**Purification condition for compound 9':**

The extract of *A. oryzae/mfmBACEF+psetPT* (Y251G+C348Y) cultivated on 150 DPY agar plates (1.38 g) was subjected to open silica gel chromatography and eluted stepwise using hexane:acetone gradient (9:1 to 1:1). Fractions containing **9** (25.0 mg) were then concentrated and reduced using 0.4 g of NaBH<sub>4</sub>. The reaction product was further purified by reverse-phase preparative HPLC (56% aqueous acetonitrile, 3.0 mL/min) to

yield 2.5 mg of **9'**.

### X-ray crystallographic analysis

A single crystal of **1'** was grown in acetonitrile by a slow evaporation process at 4 °C. Single crystal X-ray diffraction measurement was performed on a Bruker D8 Venture diffractometer using Cu K $\alpha$  radiation at 193 K. The data collection was performed with the APEX3 program, and cell refinement and data reduction were carried out using the SAINT program. The structure of **1'** was solved by direct method with the SHELXT program and refined using the SHELXL program. All non-hydrogen atoms were refined anisotropically, whereas hydrogen atoms were placed by geometrical calculations. The absolute configuration of **1'** was determined by the Flack parameter.

### Analytical data

**Compound 1'**. Colorless crystal;  $[\alpha]_D^{24} +40.4$  (*c* 1.0, CHCl<sub>3</sub>); for NMR data, see Figure S9 to Figure S15; HRMS (ESI) *m/z*: [M + H]<sup>+</sup> Calcd for C<sub>26</sub>H<sub>39</sub>O<sub>6</sub> 447.2741; Found 447.2748.

**5,7-Dihydroxy-4-(hydroxymethyl)-6-methylphthalide (3)**. White amorphous solid; for NMR data, see Figure S16 to Figure S20; HRMS (ESI) *m/z*: [M + H]<sup>+</sup> Calcd for C<sub>10</sub>H<sub>11</sub>O<sub>5</sub> 211.0601; Found 211.0599.

**5-Hydroxy-4-(hydroxymethyl)-7-methoxy-6-methylphthalide (4)**. White amorphous solid; <sup>1</sup>H NMR (CD<sub>3</sub>OD, 400 MHz):  $\delta$  5.29 (s, 2H), 4.74 (s, 2H), 3.94 (s, 3H), 2.15 (s, 3H); <sup>13</sup>C {<sup>1</sup>H} NMR (CD<sub>3</sub>OD, 100 MHz):  $\delta$  171.7, 162.1, 158.6, 147.6, 120.1, 117.4, 109.2, 69.9, 62.5, 58.8, 8.8; for NMR spectra, see Figure S21 and Figure S23; HRMS (ESI) *m/z*: [M + H]<sup>+</sup> Calcd for C<sub>11</sub>H<sub>13</sub>O<sub>5</sub> 225.0757; Found 225.0753. The NMR data are in good agreement with the reported data.<sup>12</sup>

**Compound 6'**. Colorless oil; for NMR data, see Figure S24 to Figure S29; HRMS (ESI) *m/z*: [M + H]<sup>+</sup> Calcd for C<sub>26</sub>H<sub>37</sub>O<sub>5</sub> 429.2636; Found 429.2624.

**Compound 7'**. Colorless oil;  $[\alpha]_D^{23} +11.2$  (*c* 1.0, CHCl<sub>3</sub>); for NMR data, see Figure S30 to Figure S36; HRMS (ESI) *m/z*: [M + Na]<sup>+</sup> Calcd for C<sub>26</sub>H<sub>38</sub>O<sub>6</sub>Na 469.2561; Found 469.2567.

**Compound 8'**. White amorphous solid; for NMR data, see Figure S37 to Figure S42; HRMS (ESI) *m/z*: [M + H]<sup>+</sup> Calcd for C<sub>16</sub>H<sub>21</sub>O<sub>5</sub> 293.1384; Found 293.1384.

**Compound 9'**. White amorphous solid; for NMR data, see Figure S43 to Figure S48; HRMS (ESI) *m/z*: [M + H]<sup>+</sup> Calcd for C<sub>21</sub>H<sub>29</sub>O<sub>5</sub> 361.2010; Found 361.2020.

*Crystallographic data for 1'*. C<sub>26</sub>H<sub>38</sub>O<sub>6</sub>,  $M = 446.56$ ,  $a = 9.061(12)$  Å,  $b = 11.978(12)$  Å,  $c = 12.657(16)$  Å,  $\alpha = 107.62(4)^\circ$ ,  $\beta = 110.74(4)^\circ$ ,  $\gamma = 93.69(4)^\circ$ ,  $V = 1202(3)$  Å<sup>3</sup>,  $T = 193(2)$  K, space group  $P1$ ,  $Z = 2$ ,  $\mu(\text{Cu K}\alpha) = 0.697 \text{ mm}^{-1}$ , 39 390 reflections measured, 9406 independent reflections ( $R_{\text{int}} = 0.0629$ ). The final  $R_1$  values were 0.0454 ( $I > 2\sigma(I)$ ). The final  $wR(F^2)$  values were 0.1164 ( $I > 2\sigma(I)$ ). The final  $R_1$  values were 0.0498 (all data). The final  $wR(F^2)$  values were 0.1216 (all data). The goodness of fit on  $F^2$  was 1.051. Flack parameter  $-0.06(8)$ . The crystallographic information file (CIF) for this crystal structure was submitted to The Cambridge Crystallographic Data Centre (CCDC) under reference number 2293718.

Table S1. Terpene cyclase homologues identified in this study and used to create the phylogenetic tree in Figure

S1.

| Locus tag<br>Accession<br>Origin                                                                    | Protein sequence                                                                                                                                                                                                                                                |
|-----------------------------------------------------------------------------------------------------|-----------------------------------------------------------------------------------------------------------------------------------------------------------------------------------------------------------------------------------------------------------------|
| F5B19DRAFT_81170<br>KAI1087245.1                                                                    | MLSNFHLPLNPIDKVNQPPVSYLVQVDGLILCSGLCWTTIAYILYRQAYRDKSYGMPLVCLCANIAWEFLFGAAIPESAAQV<br>SFFPWFVIDIGIVYTTWKFGREQWKHAPLVAQNLGWILLGGITGMLVMFWFTLKTYYNNRYEAGFYLAWTDDQIVSTTSVAQL<br>MSRNNSTSGHSWGIWFTRWIGSVFAELIFVWRYWNYNYPESYPVAATHVTIFLVTTELADLTYPFVYASLDKKEKKKLK*   |
| <i>Rostrophoxylon terebratum</i> CBS 119137<br>F4806DRAFT_52672<br>KAI0896154.1                     | MLSNFHLPLNPIDRVNQPVSYLQVDGLILCSGLCWTTIAYILYRQAYRDKSYGMPLVCLCANIAWEFLFGAAIPESAAQV<br>VSFFPWFVIDIGIVYTTWKFGREQWKHAPLVAQNLGWILLGGITGMLVMFWFTLKTYYNNRYEAGFYLAWTDDQIVSTTSVAQL<br>LMSRNNSTSGHSWGIWFTRWIGSVFAELIFVWRYWNYNYPESYPVAATHVTIFLVTTELADLTYPFVYASLEKKEKKKLK*   |
| <i>Annulohypoxylon nitens</i> CBS 120705<br>F4805DRAFT_30178 (MfmH)<br>KAI1452419.1                 | MFSNLHLPLNPIDKVNQPPVYLVQVDGLILCSGLCWTTIAYILYRQAYRDKSYGMPLVCLCANIAWEFLFGAAIPESAAQV<br>SFFPWFVIDIGIVYTTWKFGREQWKHAPLVAQNLGWILLGGITGMLVMFWFTLKTYYNNRYEAGFYLAWTDDQIVSTTSVAQL<br>MSRNNSTSGHSWGIWFTRWIGSVFAELIFVWRYWNYNYPESYPVAATHVTIFLVTTELADLTYPFVYASLDKKEKKKLK*    |
| <i>Annulohypoxylon moriforme</i> CBS 123579<br>GGS22DRAFT_19057<br>XP_047817924.1                   | MFSNLHLPLNPIDKVNQPPVYLVQVDGLILCSGLCWTTIAYILYRQAYRDKSYGMPLVCLCANIAWEFLFGAAIPESAAQV<br>SFFPWFVIDIGIVYTTWKFGREQWKHAPLVAQNLGWILLGGITGMLVMFWFTLKTYYNNRYEAGFYLAWTDDQIVSTTSVAQL<br>MSRNNSTSGHSWGIWFTRWIGSVFAELIFVWRYWNYNYPESYPVAATHVTIFLVTTELADLTYPFVYASLEKKEKKKLK*    |
| <i>Annulohypoxylon maeteangense</i> CBS 123835<br>F4807DRAFT_439860<br>XP_047850900.1               | MLSDFHLPLNPIDKVNQPPVHYLVQVDGLILCSGLCWTTIAYILYRQAYRDKSYGMPLVCLCANIAWEFLFGAAIPESAAQV<br>VSFFPWFVIDIGIVYTTWKFGREQWKHAPLVAQNLGWILLGGITGMLVMFWFTLKTYYNNRYEAGFYLAWTDDQIVSTTSVAQL<br>LMSRNNSTSGHSWGIWFTRWIGSVFAELIFVWRYWNYNYPESYPVAATHVTIFLVTTELADLTYPFVYASLERKEKKKLK* |
| <i>Annulohypoxylon truncatum</i> CBS 140777<br>F4781DRAFT_40845<br>KAI2465131.1                     | MLSNFHLPLNPIDKANQPPVHYLVQVDGLIISGLCWTTIAYILYRQAYRDKSYGMPLVCLCANIAWEFLFGAVIPDSAAQV<br>SFFPWFVIDIGIVYTTWKFGRDQWKHAPLVAQNLGWILLGGITGMLVMFWFTLKTYYNNRYEAGFYLAWTDDQIVSTTSVAQL<br>LMSRNNSTSGHSWGIWFTRWIGSVFAELIFVWRYWNYNYPESYPVAATHVTIFLVTTELADLTYPFVYASLEKKEKKKLK*   |
| <i>Annulohypoxylon bovei</i> var. <i>microspora</i> CBS 124037<br>F4776DRAFT_677579<br>KAI0139589.1 | MLSEFHLPLNPIDKVNQPPVSYLVQVDGLIISGLCWTTIAYILYRQAYRDKSYGMPLVCLCANIAWEFLFGAVIPDSAAQV<br>SFFPWFVIDIGIVYTTWKFGREQWKHAPLVAQNLGWILLGGITGMLVMFWFTLKTYYNNRYEAGFYLAWTDDQIVSTTSVAQL<br>MSRHNTSGHSWGIWFTRWIGSVFAELIFVWRYWNYNYPESYPVAATHVTIFLVTTELADLTYPFVYASLQKKEKKNL*      |
| <i>Hypoxylon</i> sp. NC0597<br>F5Y13DRAFT_183420<br>KAI1407369.1                                    | MLSEFHLPLNPIDRVNQPVSYLQVDGLIISGLCWTTIAYILYRQAYRDKSYGMPLVCLCANIAWEFLFGAVIPDSAAQV<br>SFFPWFVIDIGIVYTTWKFGREQWKHAPLVAQNLGWILLGGITGMLVMFWFTLKTYYNNRYEAGFYLAWTDDQIVSTTSVAQL<br>MSRHNTSGHSWGIWFTRWIGSVFAELIFVWRYWNYNYPESYPVAATHVTIFLVTTELADLTYPFVYASLQKKEKKNL*        |
| <i>Hypoxylon</i> sp. FL1857<br>HO133_005438<br>XP_037148330.1                                       | MPFHLPLSPDRRNQPPVYLVQVDGLIISGLCWTTIAYILYRQAYRDKSYGMPLVCLCANIAWEFLFGVAPTSAAQV<br>VPWLLIDVAVIYTTWRFQDQWKRSPVANMGMWVTSGLTMTGLFWFTFKITVGNLVEAGFYLAWTDDQIVSTTSVAQL<br>NNTSGHSLGIWFRASGCTLLIFLAWRYHYADSYPRVAQPTTLFLVGVSEVDSIYPMVYFLEKAKKKG*                           |
| <i>Letharia lupina</i> WasteWater1<br>G7Y79_00010g027750<br>KAG7007274.1                            | MPYHLPLSPDRRNQPPVYLVQVDGLIISGLCWTTIAYILYRQAYRDKSYGMPLVCLCANIAWEFLFGVAPTSAAQV<br>VPWLLIDVAVIYTTWRFQDQWKRSPVANMGMWVTSGLTMTGLFWFTFKITVGNLVEAGFYLAWTDDQIVSTTSVAQL<br>NNTSGHSLGIWFRASGCTLLIFLAWRYHYADSYPRVAQPTTLFLVGVSEVDSIYPMVYFLEKAKKKG*                           |
| <i>Phycia stellaris</i> C0375214F<br>B0135DRAFT_436133<br>KAH7313938.1                              | MQLHLPLSPVDTKNQPPLYLVQVDGLILQSVLWTTIAYILYRQAYRDKSYGMPLVCLCANIAWEFLFGVAPTSAAQV<br>VPWLLIDVAVIYTTWRFQDQWKRSPVANMGMWVTSGLTMTGLFWFTFKITVGNLVEAGFYLAWTDDQIVSTTSVAQL<br>SRHNTSGHSLGIWFRASGCTLLIFLAWRYHYADSYPRVAQPTTLFLVGVSEVDSIYPMVYFLEKAKKKG*                        |
| <i>Stachybotrys elegans</i> MPI-CAGE-CH-0235<br>OIDMADRAFT_101952<br>KIN05208.1                     | MALHLPLNPIDRANRPPAYLTVQDGLILSSALWTTIAYILYRQAYRDKSYGMPLVCLCANIAWEFLFGVAPTSAAQV<br>PWLVIDIGIVYTTWKFGPEQWAKHAPLVAQNLGWILLGGITGMLVMFWFTLKTYYNNRYEAGFYLAWTDDQIVSTTSVAQL<br>HSWSIWFRTTGTAAITAQFIWKYSHYPKSPYPRVAPLTLQFLFISCTMIDLIYPFVYMAVEQREGNRLK*                    |
| <i>Oidiodendron maius</i> Zn<br>Ci238_03399 <sup>a</sup><br>KZL80443.1                              | MGFHLPLNRIDKANQPPVYLVQVDGLILSVSIFWTIAYILYRQAYRDKSYGMPLFALCANIAWEFLFGVAPTSAAQV<br>VPWLLIDVAVIYTTWKFGPEQWAKHAPLVAQNLGWILLGGITGMLVMFWFTLKTYYNNRYEAGFYLAWTDDQIVSTTSVAQL<br>TAGHSWGIWFRNRTFTGLSIVLFWRYAFYPGSYPRVAQPIVVFVASEVLDVAYAFVYSHIAAQLERLQK*                   |
| <i>Colletotrichum incanum</i> MAFF 238704<br>SETTUDRAFT_36580<br>XP_008021319.1                     | MGFHLPLNRIDKANQPPVYLVQVDGLILSVSIFWTIAYILYRQAYRDKSYGMPLFALCANIAWEFLFGVAPTSAAQV<br>VPWLLIDVAVIYTTWKFGPEQWAKHAPLVAQNLGWILLGGITGMLVMFWFTLKTYYNNRYEAGFYLAWTDDQIVSTTSVAQL<br>TAGHSWGIWFRNRTFTGLSIVLFWRYAFYPGSYPRVAQPIVVFVASEVLDVAYAFVYSHIAAQLERLQK*                   |
| <i>Exserohilum turcica</i> Et28A<br>J7T55_011203<br>XP_052988876.1                                  | MSYHLPLSPVDRAIQPPVYLVQVDGLILSVSIFWTIAYILYRQAYRDKSYGMPLFALCANIAWEFLFGVAPTSAAQV<br>FVPWLLIDVAVIYTTWKFGPEQWAKHAPLVAQNLGWILLGGITGMLVMFWFTLKTYYNNRYEAGFYLAWTDDQIVSTTSVAQL<br>STSGHSWGIWFRNRTFTGLSIVLFWRYAFYPGSYPRVAQPIVVFVASEVLDVAYAFVYSHIAAQLERLQK*                 |
| <i>Diaporthe amygdali</i> CAA958<br>CORC01_00031 <sup>a</sup> (OcdTC)<br>XP_022481694.1             | MPYHLPLSPDRAIQPPVYLVQVDGLILSVSIFWTIAYILYRQAYRDKSYGMPLFALCANIAWEFLFGVAPTSAAQV<br>FVPWLLIDVAVIYTTWKFGPEQWAKHAPLVAQNLGWILLGGITGMLVMFWFTLKTYYNNRYEAGFYLAWTDDQIVSTTSVAQL<br>NLTGHSWGIWFRNRTFTGLSIVLFWRYAFYPGSYPRVAQPIVVFVASEVLDVAYAFVYSHIAAQLERLQK*                  |
| <i>Colletotrichum orchidophilum</i> IMI 309357<br>F5883DRAFT_475157<br>KAH8746268.1                 | MPYHLPLSPDRAIQPPVYLVQVDGLILSVSIFWTIAYILYRQAYRDKSYGMPLFALCANIAWEFLFGVAPTSAAQV<br>FVPWLLIDVAVIYTTWKFGPEQWAKHAPLVAQNLGWILLGGITGMLVMFWFTLKTYYNNRYEAGFYLAWTDDQIVSTTSVAQL<br>NLTGHSWGIWFRNRTFTGLSIVLFWRYAFYPGSYPRVAQPIVVFVASEVLDVAYAFVYSHIAAQLERLQK*                  |
| <i>Diaportheaceae</i> sp. PML_573<br>INS49_009288 <sup>a</sup><br>XP_043024587.1                    | MPYHLPLSPDRAIQPPVYLVQVDGLILSVSIFWTIAYILYRQAYRDKSYGMPLFALCANIAWEFLFGVAPTSAAQV<br>FVPWLLIDVAVIYTTWKFGPEQWAKHAPLVAQNLGWILLGGITGMLVMFWFTLKTYYNNRYEAGFYLAWTDDQIVSTTSVAQL<br>NLTGHSWGIWFRNRTFTGLSIVLFWRYAFYPGSYPRVAQPIVVFVASEVLDVAYAFVYSHIAAQLERLQK*                  |
| <i>Diaporthe citri</i> NFHF-8-4<br>KVR01_002063 <sup>a</sup><br>XP_044647078.1                      | MPYHLPLSPDRAIQPPVYLVQVDGLILSVSIFWTIAYILYRQAYRDKSYGMPLFALCANIAWEFLFGVAPTSAAQV<br>FVPWLLIDVAVIYTTWKFGPEQWAKHAPLVAQNLGWILLGGITGMLVMFWFTLKTYYNNRYEAGFYLAWTDDQIVSTTSVAQL<br>NLTGHSWGIWFRNRTFTGLSIVLFWRYAFYPGSYPRVAQPIVVFVASEVLDVAYAFVYSHIAAQLERLQK*                  |
| <i>Diaporthe batatas</i> CRI 302-4<br>MMC15_002493 <sup>a</sup><br>MCJ1317170.1                     | MQLHLPLSPDKVLPASVYLVQVDGLILSVSIFWTIAYILYRQAYRDKSYGMPLVCLCANIAWEFLFGVAPTSAAQV<br>FVPWLLIDVAVIYTTWKFGPEQWAKHAPLVAQNLGWILLGGITGMLVMFWFTLKTYYNNRYEAGFYLAWTDDQIVSTTSVAQL<br>GNTDGHSLGIWFRATATVAVFAFVWRYWYHPEAHARVQGFSTFLVFSVTLDDVILVLYLSLERKRSKMK*                   |
| <i>Xylographa vitiligio</i> T1866<br>F4822DRAFT_399218<br>XP_051315447.1                            | MGLHLPLSPDRNLRPPVYLVQVDGLILSGAMWTTIAYILYRQAYRDKSYGMPLVCLCANISWELLYGVVYTSVQV<br>AFTSWLITDIIYVYTTWKFGPEQWAKHAPLVAQNLGWILLGGITGMLVMFWFTLKTYYNNRYEAGFYLAWTDDQIVSTTSVAQL<br>CRDNTSGHSWGIWFRNRTFTGLSIVLFWRYAFYPGSYPRVAQPIVVFVASEVLDVAYAFVYSHIAAQLERLQK*               |
| <i>Hypoxylon trugodes</i> CBS 135444<br>RAG0_16103 <sup>a</sup><br>CZT12178.1                       | MVRYLSPVDKVNKPSRLYLQVDQDFVVLGSGIPWTIAYILYRQANIDKSYGMPLIPLCANIAWEFLFGVAPTSAAQV<br>WLIADVPVYVWTLKHGPKSWEQAPLVADNLLGLLAVGIAMMLAMHLAFRRSCKNIEDGPFVSAWVCCQLLISCGSMHLMCR<br>NETSGHSWGIWVCRWLGLTSAISLFAWRYAHYPKDYPMMAAKPMALFIFVSEADLIYFVYASLESKHGIV*                   |
| <i>Rhynchosporium agropyri</i> 04CH-RAC-A.6.1<br>RCO7_07690 <sup>a</sup><br>CZT12485.1              | MVRYLSPVDKVNKPSRLYLQVDQDFVVLGSGIPWTIAYILYRQANIDKSYGMPLIPLCANIAWEFLFGVAPTSAAQV<br>WLIADVPVYVWTLKHGPKSWEQAPLVADNLLGLLAVGIAMMLAMHLAFRRSCKNIEDGPFVSAWVCCQLLISCGSMHLMCR<br>CRNETSGHSWGIWVCRWLGLTSAISLFAWRYAHYPKDYPMMAAKPMALFIFVSEADLIYFVYASLESKHGIV*                 |
| <i>Rhynchosporium commune</i> UK7<br>RSE6_10008 <sup>a</sup><br>CZT49202.1                          | MVRYLSPVDKVNKPSRLYLQVDQDFVVLGSGIPWTIAYILYRQANIDKSYGMPLIPLCANIAWEFLFGVAPTSAAQV<br>WLIADVPVYVWTLKHGPKSWEQAPLVADNLLGLLAVGIAMMLAMHLAFRRSCKNIEDGPFVSAWVCCQLLISCGSMHLMCR<br>RNETSGHSWGIWVCRWLGLTSAISLFAWRYAHYPKDYPMMAAKPMALFIFVSEADLIYFVYASLESKHGIV*                  |
| <i>Rhynchosporium secalis</i> 02CH4-6a.1                                                            | MVRYLSPVDKVNKPSRLYLQVDQDFVVLGSGIPWTIAYILYRQANIDKSYGMPLIPLCANIAWEFLFGVAPTSAAQV<br>WLIADVPVYVWTLKHGPKSWEQAPLVADNLLGLLAVGIAMMLAMHLAFRRSCKNIEDGPFVSAWVCCQLLISCGSMHLMCR<br>RNETSGHSWGIWVCRWLGLTSAISLFAWRYAHYPKDYPMMAAKPMALFIFVSEADLIYFVYASLESKHGIV*                  |

<sup>a</sup>These sequences were manually revised in this study.



Table S4. Primers used in this study.

| Primer           | Sequence (5' to 3')                      |
|------------------|------------------------------------------|
| mfmA-F           | TCGAGCTCGGTACCCTGATTGAAGCCATGGACAAG      |
| mfmA-R           | CTACTACAGATCCCCTATACCTGCTGGTTTTTCACC     |
| mfmB-F           | TCGAGCTCGGTACCCGATGACTCAATTCGGCACTTCG    |
| mfmB-R           | CTACTACAGATCCCCACTCAATCACTCAAACCAAC      |
| mfmC-F           | TCGAGCTCGGTACCCATGGTGACTAAGCCAACAACCC    |
| mfmC-R           | CTACTACAGATCCCCGGTGTCTAGCTACACTTTAAGCTCG |
| mfmD-F           | TCGAGCTCGGTACCCATGACTGCTGCAGTCCAATCC     |
| mfmD-R           | CTACTACAGATCCCCGGTACATTTAGAAAGCGTGGTGTAC |
| mfmE-F           | TCGAGCTCGGTACCCGAGCATGGCATCCACTAC        |
| mfmE-R           | CTACTACAGATCCCCTATTGATCAAGTTCGGCCTC      |
| mfmF-F           | TCGAGCTCGGTACCCAAGATGTGGTGCCTGATTCC      |
| mfmF-R           | CTACTACAGATCCCCTCCGCGCATCTCGGTGTATCTAAC  |
| mfmG-F           | TCGAGCTCGGTACCCATGTATATGCTCCGTCCTAGC     |
| mfmG-R           | CTACTACAGATCCCCATTCTATCTAGTACTTCGTCTGC   |
| mfmH-F           | TCGAGCTCGGTACCCATGTTCTCCAATCTCCATCTCCC   |
| mfmH-R           | CTACTACAGATCCCCGGCGAATACCACCAATGATTACTTC |
| mfmJ-F           | TCGAGCTCGGTACCCATGGTTTTCTTCAAAGGAGCTACCG |
| mfmJ-R           | CTACTACAGATCCCCTAAGATTCAATTTCTTTTCATGGAC |
| ocdTC-F          | TCGAGCTCGGTACCCATGCCGTACCACCTCCCCTTAAG   |
| ocdTC-R          | CTACTACAGATCCCCTTATCTGCTTTTCTTCTATAGCGC  |
| psetPT-F         | TCGAGCTCGGTACCCATGTCGGTCAACGTTGAAGTAC    |
| psetPT-R         | CTACTACAGATCCCCGCTGCTAAATTCGTGGGGTTG     |
| mfmD_G257Y-F     | GAGCACGCTATCTGTCAACAGATTTTCGTC           |
| mfmD_G257Y-R     | TTGACAGATAGCGTGTCCACCCGCAAG              |
| mfmD_Y357C-F     | CAAAGTCTGTTTTACCCGGCTCGTG                |
| mfmD_Y357C-R     | GTAAAAACAGACTTTGGGGATCGGATATG            |
| psetPT_Y251G-F   | TCCGCGCGGTCTGGCGACCGACTTTG               |
| psetPT_Y251G-R   | GCCAGACCGCGCGGACCGTTTTTCATACTC           |
| psetPT_C348Y-F   | AAGATCTACTTCTACCCTGCGAAGCTTTGC           |
| psetPT_C348Y-R   | GTAGAAGTAGATCTTCGCGCGGG                  |
| InF-linker-F1    | GCTCGCGAGCGGTTCCACTGCATCATCAGTCTAG       |
| InF-linker-R1    | AACGCGCTCGCGAGCAAGTACCATACAGTACCGCG      |
| InF-linker-F2    | TCGCGTGCAGGTTTACCCATCATGGTGTGTTTGATC     |
| InF-linker-R2    | TAAACGCGCACGCGACATTAATCCGGATCCTTTCC      |
| InF-pAdeA_XbaI-F | GCAGGTCGACTCTAGCCATCATGGTGTGTTTGATC      |
| InF-pAdeA_XbaI-R | TAGTAGATCCTCTAGGTAAGATACATGAGCTTCGG      |
| InF-pAdeA_SpeI-F | TAGAGGATCTACTAGTCAAGAGCAGAATGTGAACG      |
| InF-pAdeA_SpeI-R | AATCCATATGACTAGTGATACATGAGCTTCGGTG       |
| InF-pUSA_BamHI-F | TTATAGGAAAGGATCCCCTCATGGTGTGTTTGATC      |
| InF-pUSA_BamHI-R | TGACTCTAGAGGATCGTAAGATACATGAGCTTCGG      |

Table S5. Plasmids constructed in this study and PCR conditions for the amplification of the inserts for the plasmid constructions.

| Plasmid                       | Inserts                                                                                                                                                                       | Primer 1                                           | Primer 2                                           | PCR Template                              | Vector                                  |
|-------------------------------|-------------------------------------------------------------------------------------------------------------------------------------------------------------------------------|----------------------------------------------------|----------------------------------------------------|-------------------------------------------|-----------------------------------------|
| pPyrG-mfmA                    | <i>mfmA</i>                                                                                                                                                                   | mfmA-F                                             | mfmA-R                                             | gDNA                                      | pPyrG digested with <i>Sma</i> I        |
| pTAex3-mfmB                   | <i>mfmB</i>                                                                                                                                                                   | mfmB-F                                             | mfmB-R                                             | gDNA                                      | pTAex3 digested with <i>Sma</i> I       |
| pTAex3-mfmC                   | <i>mfmC</i>                                                                                                                                                                   | mfmC-F                                             | mfmC-R                                             | gDNA                                      | pTAex3 digested with <i>Sma</i> I       |
| pTAex3-mfmD                   | <i>mfmD</i>                                                                                                                                                                   | mfmD-F                                             | mfmD-R                                             | gDNA                                      | pTAex3 digested with <i>Sma</i> I       |
| pTAex3-mfmE                   | <i>mfmE</i>                                                                                                                                                                   | mfmE-F                                             | mfmE-R                                             | gDNA                                      | pTAex3 digested with <i>Sma</i> I       |
| pTAex3-mfmF                   | <i>mfmF</i>                                                                                                                                                                   | mfmF-F                                             | mfmF-R                                             | gDNA                                      | pTAex3 digested with <i>Sma</i> I       |
| pTAex3-mfmG                   | <i>mfmG</i>                                                                                                                                                                   | mfmG-F                                             | mfmG-R                                             | gDNA                                      | pTAex3 digested with <i>Sma</i> I       |
| pTAex3-mfmH                   | <i>mfmH</i>                                                                                                                                                                   | mfmH-F                                             | mfmH-R                                             | gDNA                                      | pTAex3 digested with <i>Sma</i> I       |
| pTAex3-mfmJ                   | <i>mfmJ</i>                                                                                                                                                                   | mfmJ-F                                             | mfmJ-R                                             | gDNA                                      | pTAex3 digested with <i>Sma</i> I       |
| pTAex3-ocdTC                  | <i>ocdTC</i>                                                                                                                                                                  | ocdTC-F                                            | ocdTC-R                                            | gDNA                                      | pTAex3 digested with <i>Sma</i> I       |
| pTAex3-psetPT                 | <i>psetPT</i>                                                                                                                                                                 | psetPT-F                                           | psetPT-R                                           | gDNA                                      | pTAex3 digested with <i>Sma</i> I       |
| pPyrG-mfmA+C                  | <i>PamyB-mfmC-TamyB</i>                                                                                                                                                       | InF-pUSA_BamHI-F                                   | InF-pUSA_BamHI-R                                   | pTAex3-mfmC                               | pPyrG-mfmA digested with <i>Bam</i> HI  |
| pPyrG-mfmA+C+E                | <i>PamyB-mfmC-TamyB</i><br><i>PamyB-mfmE-TamyB</i>                                                                                                                            | InF-pUSA_BamHI-F<br>InF-Linker-F1                  | InF-Linker-R1<br>InF-pUSA_BamHI-R                  | pTAex3-mfmC<br>pTAex3-mfmE                | pPyrG-mfmA digested with <i>Bam</i> HI  |
| pPyrG-mfmA+C+E+F              | <i>PamyB-mfmC-TamyB</i><br><i>PamyB-mfmE-TamyB</i><br><i>PamyB-mfmF-TamyB</i>                                                                                                 | InF-pUSA_BamHI-F<br>InF-Linker-F1<br>InF-Linker-F2 | InF-Linker-R1<br>InF-Linker-R2<br>InF-pUSA_BamHI-R | pTAex3-mfmC<br>pTAex3-mfmE<br>pTAex3-mfmF | pPyrG-mfmA digested with <i>Bam</i> HI  |
| pPyrG-mfmA+C+D                | <i>PamyB-mfmC-TamyB</i><br><i>PamyB-mfmD-TamyB</i>                                                                                                                            | InF-pUSA_BamHI-F<br>InF-Linker-F1                  | InF-Linker-R1<br>InF-pUSA_BamHI-R                  | pTAex3-mfmC<br>pTAex3-mfmD                | pPyrG-mfmA digested with <i>Bam</i> HI  |
| pPyrG-mfmA+C+D+E              | <i>PamyB-mfmC-TamyB</i><br><i>PamyB-mfmD-TamyB</i><br><i>PamyB-mfmE-TamyB</i>                                                                                                 | InF-pUSA_BamHI-F<br>InF-Linker-F1<br>InF-Linker-F2 | InF-Linker-R1<br>InF-Linker-R2<br>InF-pUSA_BamHI-R | pTAex3-mfmC<br>pTAex3-mfmD<br>pTAex3-mfmE | pPyrG-mfmA digested with <i>Bam</i> HI  |
| pAdeA-mfmF+G                  | <i>PamyB-mfmF-TamyB</i><br><i>PamyB-mfmG-TamyB</i>                                                                                                                            | InF-pAdeA_XbaI-F<br>InF-Linker-F1                  | InF-Linker-R1<br>InF-pAdeA_XbaI-R                  | pTAex3-mfmF<br>pTAex3-mfmG                | pAdeA digested with <i>Xba</i> I        |
| pAdeA-mfmF+G+H+J              | <i>PamyB-mfmH-TamyB</i><br><i>PamyB-mfmJ-TamyB</i>                                                                                                                            | InF-pAdeA_SpeI-F<br>InF-Linker-F1                  | InF-Linker-R1<br>InF-pAdeA_SpeI-R                  | pTAex3-mfmH<br>pTAex3-mfmJ                | pAdeA-mfmF+G digested with <i>Spe</i> I |
| pAdeA-mfmF+G+H                | <i>PamyB-mfmH-TamyB</i>                                                                                                                                                       | InF-pAdeA_SpeI-F                                   | InF-pAdeA_SpeI-R                                   | pTAex3-mfmH                               | pAdeA-mfmF+G digested with <i>Spe</i> I |
| pAdeA-mfmG+H                  | <i>PamyB-mfmG-TamyB</i><br><i>PamyB-mfmH-TamyB</i>                                                                                                                            | InF-pAdeA_SpeI-F<br>InF-Linker-F1                  | InF-Linker-R1<br>InF-pAdeA_SpeI-R                  | pTAex3-mfmG<br>pTAex3-mfmH                | pAdeA digested with <i>Xba</i> I        |
| pAdeA-mfmG+H+J                | <i>PamyB-mfmJ-TamyB</i>                                                                                                                                                       | InF-pAdeA_SpeI-F                                   | InF-pAdeA_SpeI-R                                   | pTAex3-mfmJ                               | pAdeA-mfmG+H digested with <i>Spe</i> I |
| pAdeA-mfmG+F                  | <i>PamyB-mfmG-TamyB</i><br><i>PamyB-mfmF-TamyB</i>                                                                                                                            | InF-pAdeA_SpeI-F<br>InF-Linker-F1                  | InF-Linker-R1<br>InF-pAdeA_SpeI-R                  | pTAex3-mfmG<br>pTAex3-mfmF                | pAdeA digested with <i>Xba</i> I        |
| pAdeA-mfmG+F+J                | <i>PamyB-mfmJ-TamyB</i>                                                                                                                                                       | InF-pAdeA_SpeI-F                                   | InF-pAdeA_SpeI-R                                   | pTAex3-mfmJ                               | pAdeA-mfmG+F digested with <i>Spe</i> I |
| pAdeA-mfmF+H                  | <i>PamyB-mfmF-TamyB</i><br><i>PamyB-mfmH-TamyB</i>                                                                                                                            | InF-pAdeA_SpeI-F<br>InF-Linker-F1                  | InF-Linker-R1<br>InF-pAdeA_SpeI-R                  | pTAex3-mfmF<br>pTAex3-mfmH                | pAdeA digested with <i>Xba</i> I        |
| pAdeA-mfmF+H+J                | <i>PamyB-mfmJ-TamyB</i>                                                                                                                                                       | InF-pAdeA_SpeI-F                                   | InF-pAdeA_SpeI-R                                   | pTAex3-mfmJ                               | pAdeA-mfmF+H digested with <i>Spe</i> I |
| pAdeA-mfmD+H                  | <i>PamyB-mfmD-TamyB</i><br><i>PamyB-mfmH-TamyB</i>                                                                                                                            | InF-pAdeA_XbaI-F<br>InF-Linker-F1                  | InF-Linker-R1<br>InF-pAdeA_XbaI-R                  | pTAex3-mfmD<br>pTAex3-mfmH                | pAdeA digested with <i>Xba</i> I        |
| pAdeA-mfmD+ocdTC              | <i>PamyB-mfmD-TamyB</i><br><i>PamyB-ocdTC-TamyB</i>                                                                                                                           | InF-pAdeA_XbaI-F<br>InF-Linker-F1                  | InF-Linker-R1<br>InF-pAdeA_XbaI-R                  | pTAex3-mfmD<br>pTAex3-ocdTC               | pAdeA digested with <i>Xba</i> I        |
| pAdeA-HR-mfmD                 | <i>PamyB-mfmD-TamyB</i>                                                                                                                                                       | InF-pAdeA_XbaI-F                                   | InF-pAdeA_XbaI-R                                   | pTAex3-mfmD                               | pAdeA-HR digested with <i>Xba</i> I     |
| pAdeA-HR-psetPT               | <i>PamyB-psetPT-TamyB</i>                                                                                                                                                     | InF-pAdeA_XbaI-F                                   | InF-pAdeA_XbaI-R                                   | pTAex3-psetPT                             | pAdeA-HR digested with <i>Xba</i> I     |
| pTAex3-mfmD (G257Y)           | 1 <sup>st</sup> fragment of <i>mfmD</i> (G257Y)<br>2 <sup>nd</sup> fragment of <i>mfmD</i> (G257Y)                                                                            | mfmD-F<br>mfmD-G257Y-F                             | mfmD-G257Y-R<br>mfmD-R                             | pTAex3-mfmD                               | pTAex3 digested with <i>Sma</i> I       |
| pTAex3-mfmD (Y357C)           | 1 <sup>st</sup> fragment of <i>mfmD</i> (Y357C)<br>2 <sup>nd</sup> fragment of <i>mfmD</i> (Y357C)                                                                            | mfmD-F<br>mfmD-Y357C-F                             | mfmD-Y357C-R<br>mfmD-R                             | pTAex3-mfmD                               | pTAex3 digested with <i>Sma</i> I       |
| pTAex3-mfmD (G257Y/Y357C)     | 1 <sup>st</sup> fragment of <i>mfmD</i> (G257Y/Y357C)<br>2 <sup>nd</sup> fragment of <i>mfmD</i> (G257Y/Y357C)<br>3 <sup>rd</sup> fragment of <i>mfmD</i> (G257Y/Y357C)       | mfmD-F<br>mfmD-G257Y-F<br>mfmD-Y357C-F             | mfmD-G257Y-R<br>mfmD-Y357C-R<br>mfmD-R             | pTAex3-mfmD                               | pTAex3 digested with <i>Sma</i> I       |
| pTAex3-psetPT (Y251G)         | 1 <sup>st</sup> fragment of <i>psetPT</i> (Y251G)<br>2 <sup>nd</sup> fragment of <i>psetPT</i> (Y251G)                                                                        | psetPT-F<br>psetPT-Y251G-F                         | psetPT-Y251G-R<br>psetPT-R                         | pTAex3-psetPT                             | pTAex3 digested with <i>Sma</i> I       |
| pTAex3-psetPT (C348Y)         | 1 <sup>st</sup> fragment of <i>psetPT</i> (C348Y)<br>2 <sup>nd</sup> fragment of <i>psetPT</i> (C348Y)                                                                        | psetPT-F<br>psetPT-C348Y-F                         | psetPT-C348Y-R<br>psetPT-R                         | pTAex3-psetPT                             | pTAex3 digested with <i>Sma</i> I       |
| pTAex3-psetPT (Y251G/C348Y)   | 1 <sup>st</sup> fragment of <i>psetPT</i> (Y251G/C348Y)<br>2 <sup>nd</sup> fragment of <i>psetPT</i> (Y251G/C348Y)<br>3 <sup>rd</sup> fragment of <i>psetPT</i> (Y251G/C348Y) | psetPT-F<br>psetPT-Y251G-F<br>psetPT-C348Y-F       | psetPT-Y251G-R<br>psetPT-C348Y-R<br>psetPT-R       | pTAex3-psetPT                             | pTAex3 digested with <i>Sma</i> I       |
| pAdeA-HR-mfmD (G257Y)         | <i>PamyB-mfmD</i> (G257Y)- <i>TamyB</i>                                                                                                                                       | InF-pAdeA_XbaI-F                                   | InF-pAdeA_XbaI-R                                   | pTAex3-mfmD (G257Y)                       | pAdeA-HR digested with <i>Xba</i> I     |
| pAdeA-HR-mfmD (Y357C)         | <i>PamyB-mfmD</i> (Y357C)- <i>TamyB</i>                                                                                                                                       | InF-pAdeA_XbaI-F                                   | InF-pAdeA_XbaI-R                                   | pTAex3-mfmD (Y357C)                       | pAdeA-HR digested with <i>Xba</i> I     |
| pAdeA-HR-mfmD (G257Y/Y357C)   | <i>PamyB-mfmD</i> (G257Y/Y357C)- <i>TamyB</i>                                                                                                                                 | InF-pAdeA_XbaI-F                                   | InF-pAdeA_XbaI-R                                   | pTAex3-mfmD (G257Y+Y357C)                 | pAdeA-HR digested with <i>Xba</i> I     |
| pAdeA-HR-psetPT (Y251G)       | <i>PamyB-psetPT</i> (Y251G)- <i>TamyB</i>                                                                                                                                     | InF-pAdeA_XbaI-F                                   | InF-pAdeA_XbaI-R                                   | pTAex3-psetPT (Y251G)                     | pAdeA-HR digested with <i>Xba</i> I     |
| pAdeA-HR-psetPT (C348Y)       | <i>PamyB-psetPT</i> (C348Y)- <i>TamyB</i>                                                                                                                                     | InF-pAdeA_XbaI-F                                   | InF-pAdeA_XbaI-R                                   | pTAex3-psetPT (C348Y)                     | pAdeA-HR digested with <i>Xba</i> I     |
| pAdeA-HR-psetPT (Y251G/C348Y) | <i>PamyB-psetPT</i> (Y251G/C348Y)- <i>TamyB</i>                                                                                                                               | InF-pAdeA_XbaI-F                                   | InF-pAdeA_XbaI-R                                   | pTAex3-psetPT (Y251G+C348Y)               | pAdeA-HR digested with <i>Xba</i> I     |

Table S6. *Aspergillus oryzae* transformants constructed in this study.

| Strain                                         | Host strain               | Plasmids used for transformation |
|------------------------------------------------|---------------------------|----------------------------------|
| <i>A. oryzae/mfmB</i>                          | <i>A. oryzae</i> NSARU1   | pTAex3-mfmB                      |
| <i>A. oryzae/mfmBAC</i>                        | <i>A. oryzae/mfmB</i>     | pPyrG-mfmA+C                     |
| <i>A. oryzae/mfmBACE</i>                       | <i>A. oryzae/mfmB</i>     | pPyrG-mfmA+C+E                   |
| <i>A. oryzae/mfmBACEF</i>                      | <i>A. oryzae/mfmB</i>     | pPyrG-mfmA+C+E+F                 |
| <i>A. oryzae/mfmBACDE</i>                      | <i>A. oryzae/mfmB</i>     | pPyrG-mfmA+C+D+E                 |
| <i>A. oryzae/mfmBACDEFGHJ</i>                  | <i>A. oryzae/mfmBACDE</i> | pAdeA-mfmF+G+H+J                 |
| <i>A. oryzae/mfmBACEFGHJ</i>                   | <i>A. oryzae/mfmB</i>     | pPyrG-mfmA+C+E, pAdeA-mfmF+G+H+J |
| <i>A. oryzae/mfmBACDFGHJ</i>                   | <i>A. oryzae/mfmB</i>     | pPyrG-mfmA+C+D, pAdeA-mfmF+G+H+J |
| <i>A. oryzae/mfmBACDEGHJ</i>                   | <i>A. oryzae/mfmBACDE</i> | pAdeA-mfmG+H+J                   |
| <i>A. oryzae/mfmBACDEFHJ</i>                   | <i>A. oryzae/mfmBACDE</i> | pAdeA-mfmF+H+J                   |
| <i>A. oryzae/mfmBACDEFGJ</i>                   | <i>A. oryzae/mfmBACDE</i> | pAdeA-mfmF+G+J                   |
| <i>A. oryzae/mfmBACDEFGH</i>                   | <i>A. oryzae/mfmBACDE</i> | pAdeA-mfmF+G+H                   |
| <i>A. oryzae/mfmBACEFDH</i>                    | <i>A. oryzae/mfmBACEF</i> | pAdeA-mfmD+H                     |
| <i>A. oryzae/mfmBACEFD+ocdTC</i>               | <i>A. oryzae/mfmBACEF</i> | pAdeA-mfmD+ocdTC                 |
| <i>A. oryzae/mfmBACEFD</i>                     | <i>A. oryzae/mfmBACEF</i> | pAdeA-HR-mfmD                    |
| <i>A. oryzae/mfmBACEF+psetPT</i>               | <i>A. oryzae/mfmBACEF</i> | pAdeA-HR-psetPT                  |
| <i>A. oryzae/mfmBACEFD</i> (G257Y)             | <i>A. oryzae/mfmBACEF</i> | pAdeA-HR-mfmD (G257Y)            |
| <i>A. oryzae/mfmBACEFD</i> (Y357C)             | <i>A. oryzae/mfmBACEF</i> | pAdeA-HR-mfmD (Y357C)            |
| <i>A. oryzae/mfmBACEFD</i> (G257Y+Y357C)       | <i>A. oryzae/mfmBACEF</i> | pAdeA-HR-mfmD (G257Y+Y357C)      |
| <i>A. oryzae/mfmBACEF+psetPT</i> (Y251G)       | <i>A. oryzae/mfmBACEF</i> | pAdeA-HR-psetPT (Y251G)          |
| <i>A. oryzae/mfmBACEF+psetPT</i> (C348Y)       | <i>A. oryzae/mfmBACEF</i> | pAdeA-HR-psetPT (C348Y)          |
| <i>A. oryzae/mfmBACEF+psetPT</i> (Y251G+C348Y) | <i>A. oryzae/mfmBACEF</i> | pAdeA-HR-psetPT (Y251G+C348Y)    |



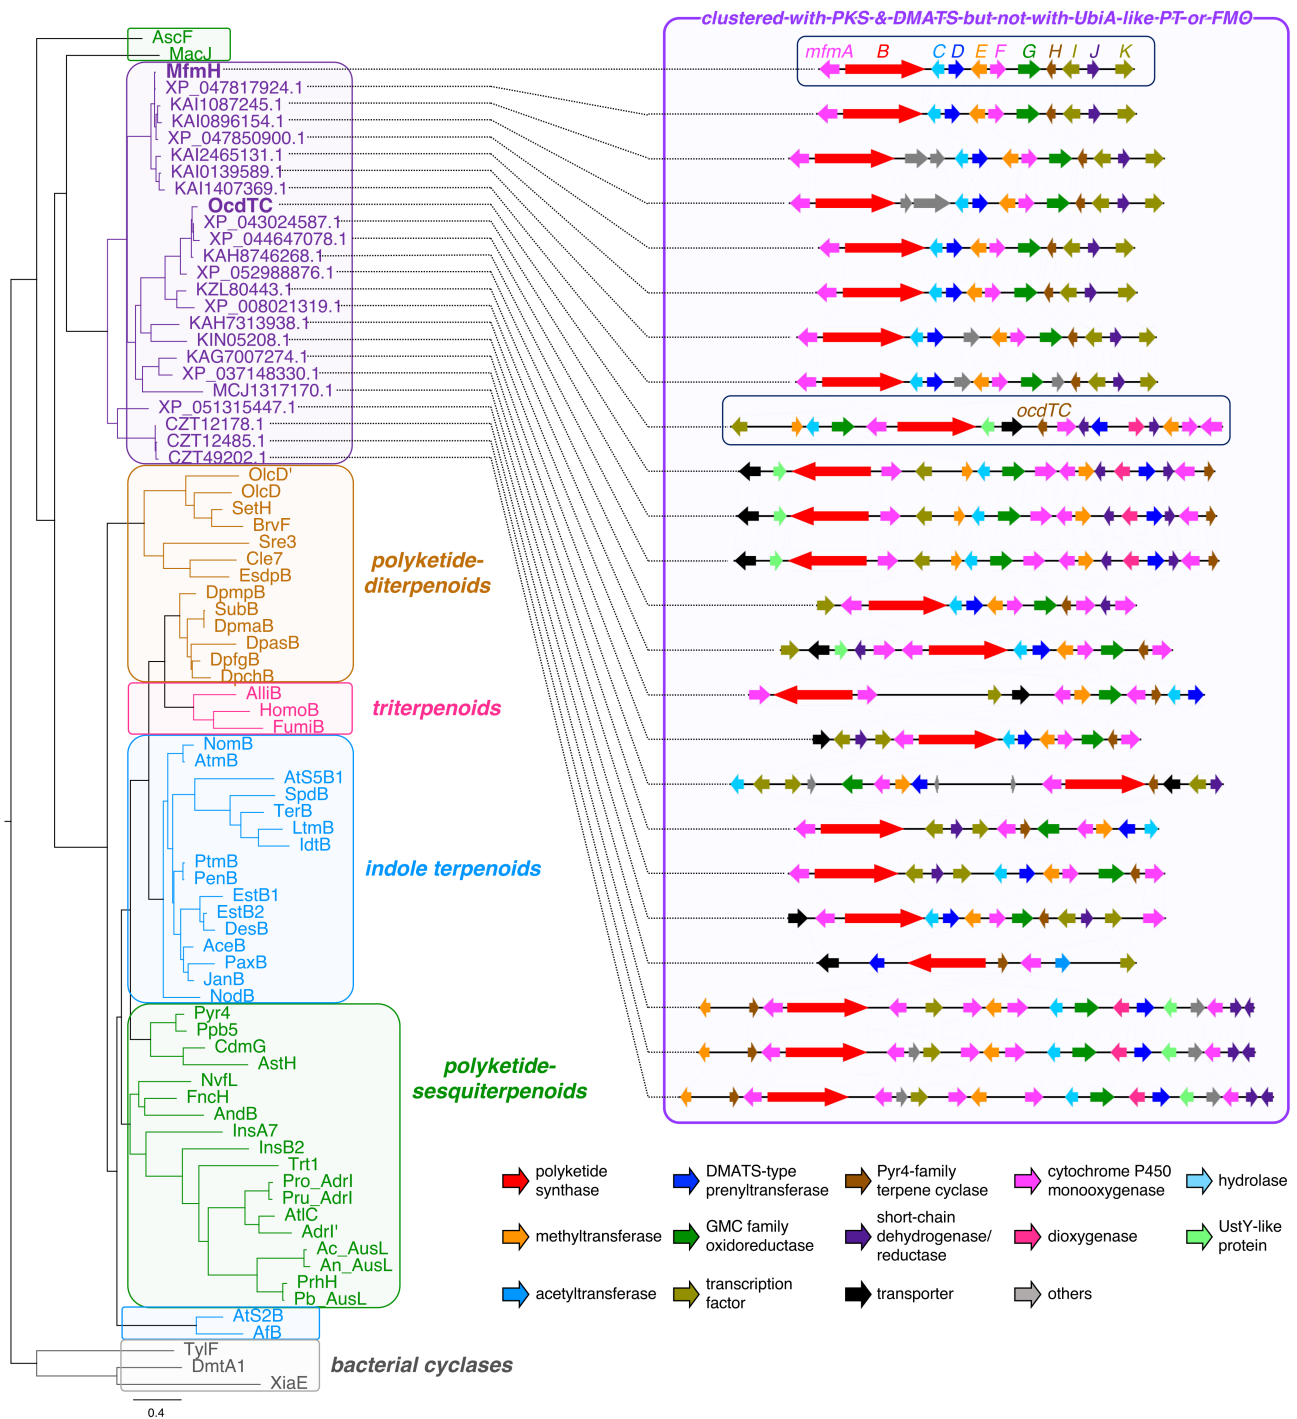

Figure S1. Phylogenetic analysis of the characterized Pyr4 homologues and those clustered with a PKS and a dimethylallyltryptophan synthase (DMATS)-type prenyltransferase identified in this study, along with their associated BGCs. Some of the gene sequences were manually revised upon creating the phylogenetic tree (refer to Table S1 and Supplementary Data for their sequences). The BGCs focused on in this study are boxed.

| BGC2 - Annulohyoxylon moriforme |                                 |
|---------------------------------|---------------------------------|
| Scaffold / Position             | MU403194 / 31289...66340        |
| Length (bp)                     | 35052                           |
| Core enzymes                    | NR-PKS, TC (Pyr4), PT (DMATS)   |
| Similar BGC / Similarity score  | FBGC00220 (aspernidine A) / 8.6 |

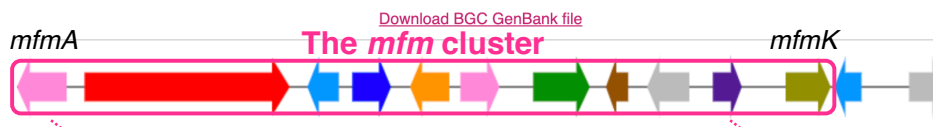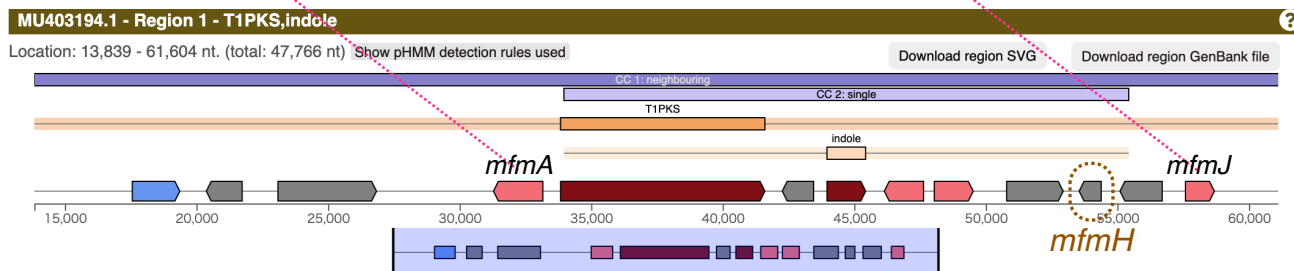

**Legend:**

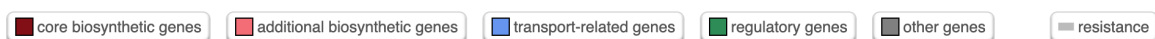

Figure S2. Comparison of BGC extractions by FunBGCeX (top) and antiSMASH (bottom). Genomic regions corresponding to the *mfm* cluster is shown. In the antiSMASH analysis, the terpene cyclase gene *mfmH* is classified as “other genes.”

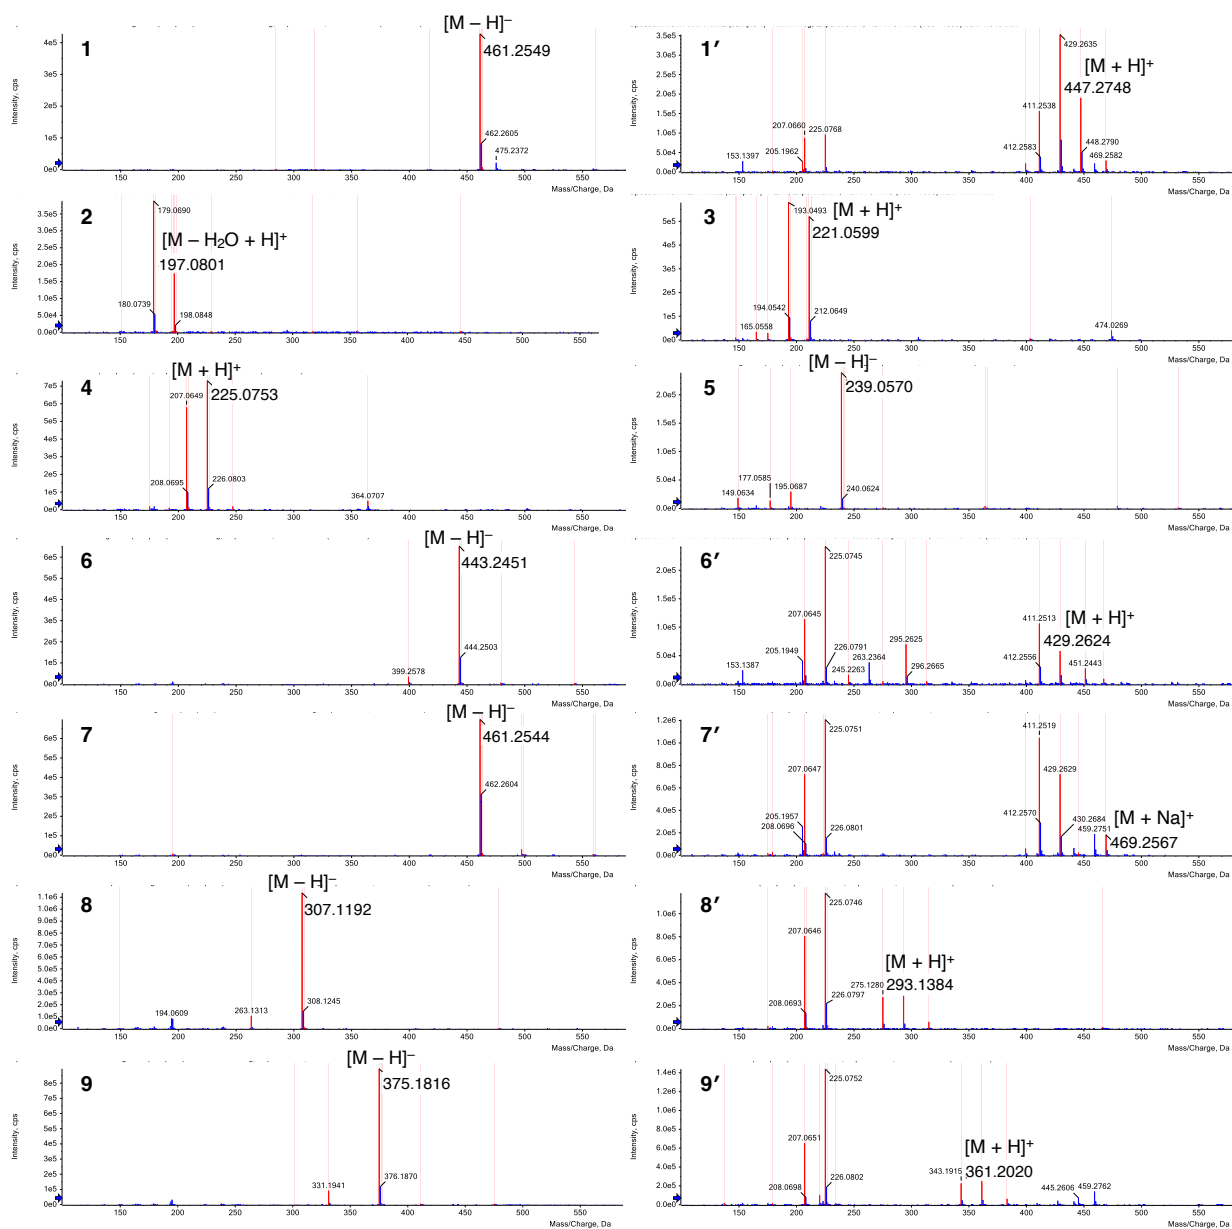

Figure S3. MS spectra of metabolites detected or isolated in this study.

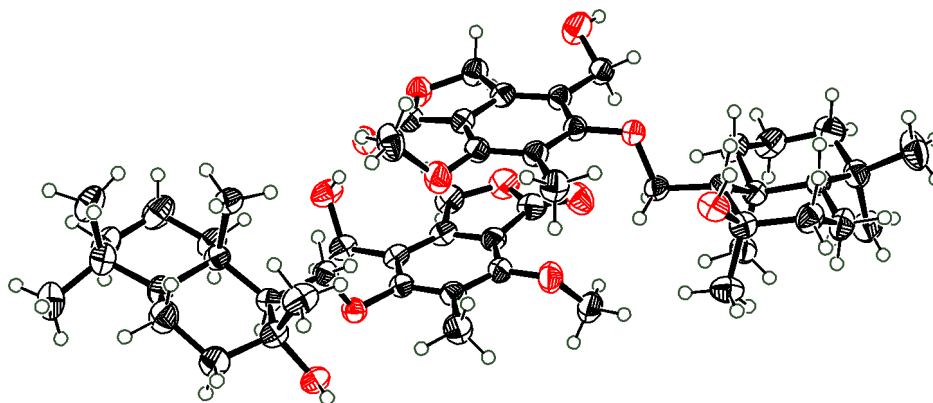

Figure S4. X-ray crystal structure of compound 1' (with 50% probability of thermal ellipsoid).

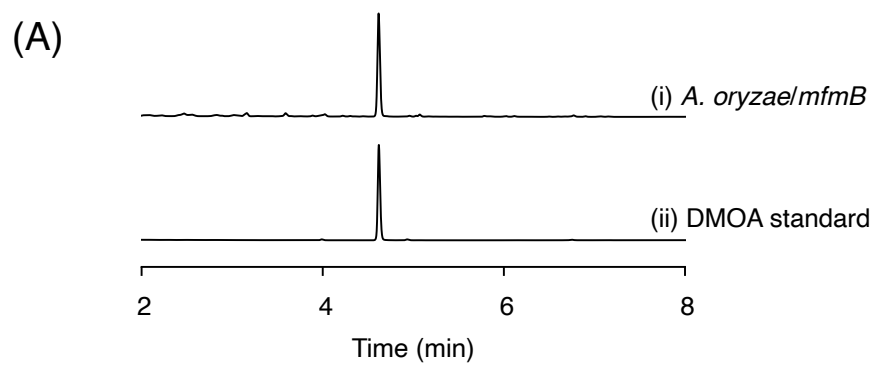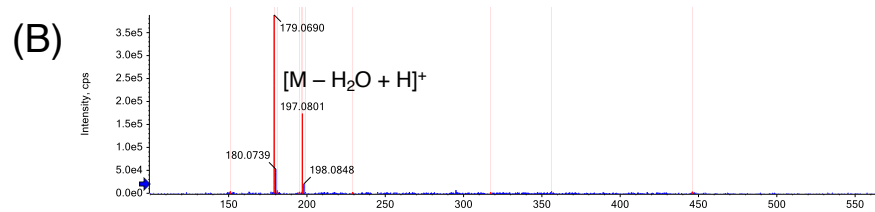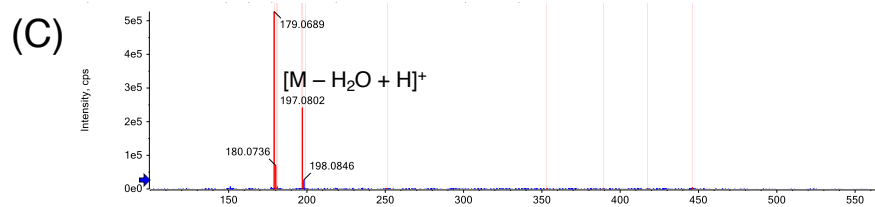

Figure S5. (A) HPLC analysis of (i) the metabolites from the *A. oryzae* transformant expressing *mfmB* and (ii) the DMOA standard. (B, C) MS spectra of (B) **2** detected in the *A. oryzae* transformant and (C) the DMOA standard.

0 Identity (%) 100

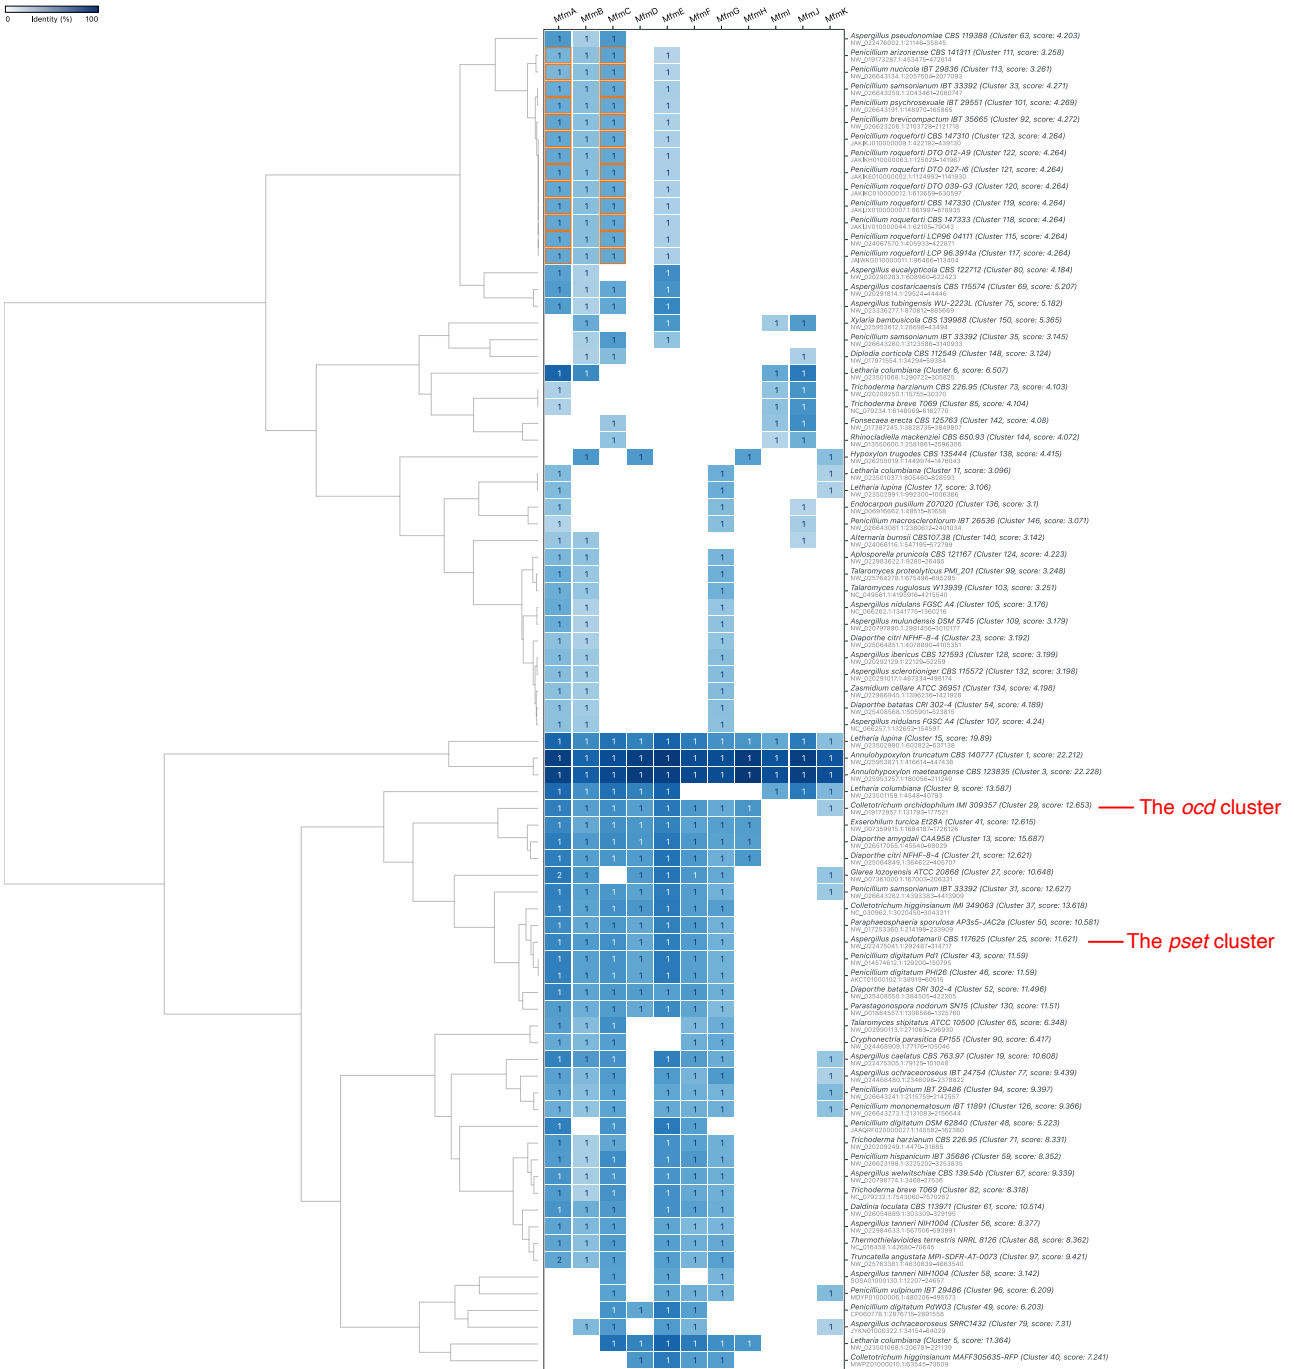

Figure S6. Result of the cblast analysis against the RefSeq database using the sequences of MfmA–K as queries.

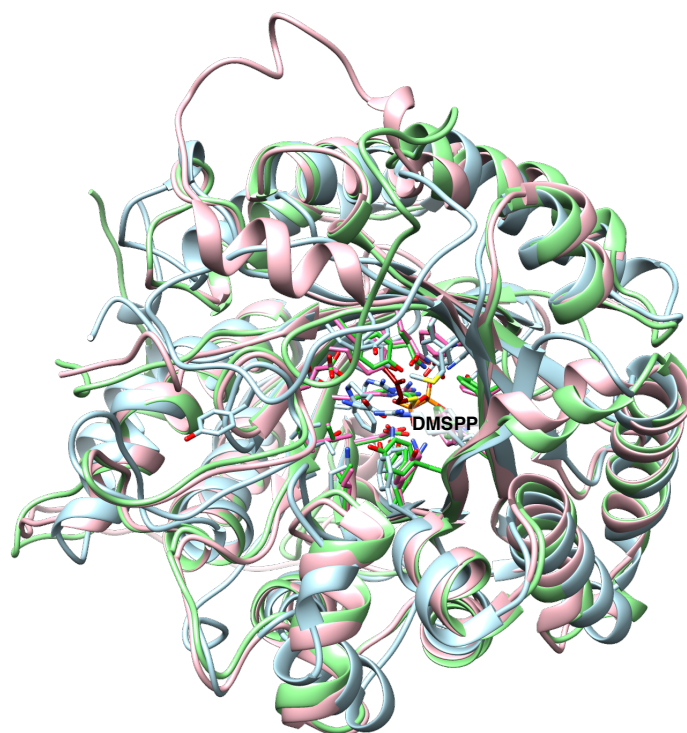

Figure S7. Superimposition of the modeled structures of MfmD (pink) and PsetPT (light green) and the crystal structure of FgaPT2 (light blue) in the complex with DMSPP (PDB: 3I4X).

|        |                                                        |                                                          |                                                        |                                                        |                                                        |                                                        |    |
|--------|--------------------------------------------------------|----------------------------------------------------------|--------------------------------------------------------|--------------------------------------------------------|--------------------------------------------------------|--------------------------------------------------------|----|
| MfmD   | 1                                                      | 10                                                       | 20                                                     | 30                                                     | 40                                                     | 50                                                     | 60 |
| PsetPT |                                                        |                                                          |                                                        |                                                        |                                                        |                                                        |    |
| MfmD   | <b>M</b> TAA <b>V</b> Q <b>S</b> P <b>V</b> L          | P <b>L</b> E <b>K</b> E <b>N</b> V <b>A</b> D            | I <b>A</b> I <b>P</b> E <b>G</b> D <b>S</b> T <b>Y</b> | <b>W</b> W <b>R</b> T <b>S</b> G <b>Q</b> D <b>L</b> S | <b>R</b> M <b>L</b> Q <b>E</b> A <b>G</b> Y <b>P</b> D | <b>E</b> A <b>K</b> R <b>Q</b> F <b>L</b> N <b>Y</b> F |    |
| PsetPT | <b>M</b> S <b>V</b> T <b>M</b> E <b>L</b> P <b>T</b> F | Q <b>S</b> I <b>L</b> G <b>R</b> E <b>S</b> P <b>A</b> S | E <b>G</b> L <b>P</b> ----- <b>Y</b>                   | <b>W</b> W <b>L</b> T <b>S</b> G <b>R</b> D <b>L</b> A | <b>R</b> M <b>L</b> Q <b>E</b> A <b>Q</b> Y <b>P</b> E | <b>D</b> T <b>Q</b> R <b>Q</b> F <b>L</b> L <b>F</b> F |    |
| MfmD   | <b>R</b> D <b>T</b> I <b>C</b> P <b>T</b> L <b>G</b> G | K <b>P</b> D <b>S</b> N <b>A</b> L <b>R</b> T <b>A</b>   | <b>V</b> G <b>W</b> D <b>G</b> S <b>P</b> F <b>E</b> Y | <b>S</b> F <b>E</b> F <b>K</b> E <b>S</b> T <b>K</b> S | <b>A</b> G <b>V</b> R <b>F</b> V <b>V</b> D <b>L</b> T | <b>Q</b> L <b>R</b> P <b>G</b> D <b>K</b> S <b>A</b> P |    |
| PsetPT | <b>R</b> D <b>T</b> I <b>C</b> P <b>Q</b> L <b>G</b> G | R <b>P</b> E <b>A</b> D <b>S</b> L <b>R</b> S <b>G</b>   | <b>V</b> G <b>W</b> D <b>G</b> N <b>P</b> F <b>E</b> Y | <b>S</b> F <b>E</b> L <b>K</b> S <b>S</b> G <b>K</b> E | <b>Q</b> A <b>V</b> R <b>F</b> V <b>V</b> D <b>V</b> S | <b>P</b> L <b>R</b> P <b>A</b> D <b>D</b> A <b>N</b> P |    |
| MfmD   | <b>L</b> T <b>T</b> K <b>T</b> T <b>E</b> N <b>V</b> I | E <b>S</b> L <b>S</b> K <b>K</b> T <b>P</b> L <b>F</b>   | <b>D</b> D <b>N</b> W <b>H</b> R <b>A</b> L <b>S</b> Q | <b>W</b> F <b>V</b> Y <b>S</b> H <b>A</b> P <b>E</b> S | <b>E</b> Q <b>K</b> A <b>L</b> V <b>A</b> A <b>A</b> G | <b>Y</b> Q <b>T</b> N <b>I</b> I <b>M</b> G <b>F</b> D |    |
| PsetPT | <b>L</b> S <b>I</b> K <b>N</b> F <b>E</b> I <b>V</b> L | D <b>A</b> L <b>A</b> K <b>K</b> T <b>P</b> G <b>F</b>   | <b>D</b> D <b>I</b> W <b>Y</b> A <b>S</b> L <b>R</b> K | <b>W</b> F <b>V</b> H <b>S</b> D <b>R</b> S <b>T</b> E | <b>E</b> Q <b>K</b> S <b>L</b> V <b>A</b> Q <b>A</b> G | <b>Y</b> Q <b>M</b> P <b>M</b> I <b>L</b> G <b>F</b> D |    |
| MfmD   | <b>I</b> N <b>A</b> K <b>I</b> L <b>D</b> L <b>A</b> P | G <b>Y</b> L <b>P</b> I <b>M</b> A <b>K</b> S <b>Y</b>   | <b>F</b> P <b>P</b> C <b>F</b> V <b>A</b> E <b>A</b> K | <b>G</b> F <b>T</b> R <b>W</b> Q <b>A</b> L <b>S</b> L | <b>G</b> I <b>R</b> Q <b>I</b> P <b>D</b> I <b>G</b> S | <b>H</b> P <b>N</b> I <b>L</b> L <b>A</b> L <b>K</b> L |    |
| PsetPT | <b>I</b> R <b>R</b> R <b>L</b> -- <b>P</b> S <b>P</b>  | D <b>A</b> I <b>P</b> V <b>M</b> A <b>K</b> V <b>Y</b>   | <b>F</b> P <b>P</b> C <b>F</b> T <b>A</b> V <b>A</b> E | <b>G</b> I <b>T</b> R <b>W</b> E <b>A</b> V <b>R</b> R | <b>G</b> V <b>Y</b> Q <b>L</b> P <b>N</b> I <b>E</b> S | <b>H</b> P <b>N</b> I <b>L</b> R <b>S</b> I <b>E</b> L |    |
| MfmD   | <b>I</b> E <b>D</b> Y <b>V</b> A <b>A</b> K <b>P</b> - | E <b>L</b> A <b>G</b> G <b>A</b> R <b>G</b> L <b>S</b>   | <b>T</b> D <b>F</b> V <b>K</b> A <b>G</b> K <b>A</b> R | <b>L</b> K <b>I</b> Y <b>M</b> R <b>Y</b> L <b>G</b> D | <b>D</b> F <b>E</b> E <b>V</b> W <b>D</b> Y <b>Y</b> T | <b>L</b> G <b>G</b> K <b>I</b> P <b>D</b> L <b>E</b> S |    |
| PsetPT | <b>I</b> Q <b>Q</b> Y <b>L</b> D <b>S</b> K <b>P</b> K | E <b>Y</b> E <b>N</b> G <b>P</b> R <b>Y</b> L <b>A</b>   | <b>T</b> D <b>F</b> V <b>T</b> T <b>D</b> Q <b>A</b> R | <b>L</b> K <b>I</b> Y <b>M</b> R <b>H</b> P <b>A</b> E | <b>S</b> F <b>E</b> D <b>I</b> W <b>D</b> Y <b>Y</b> T | <b>L</b> G <b>G</b> R <b>I</b> P <b>G</b> L <b>D</b> E |    |
| MfmD   | <b>D</b> K <b>E</b> M <b>E</b> R <b>D</b> L <b>M</b> T | L <b>S</b> S <b>P</b> S <b>T</b> Y <b>T</b> E <b>E</b>   | D <b>W</b> K <b>D</b> T <b>Q</b> V <b>D</b> P <b>R</b> | <b>R</b> R <b>A</b> A <b>F</b> K <b>T</b> K <b>P</b> T | <b>A</b> V <b>Y</b> F <b>S</b> L <b>S</b> P <b>D</b> K | <b>P</b> Y <b>P</b> I <b>P</b> K <b>V</b> Y <b>F</b> Y |    |
| PsetPT | <b>D</b> K <b>E</b> K <b>F</b> R <b>E</b> L <b>M</b> S | L <b>T</b> A--- <b>Y</b> N <b>P</b> D                    | P <b>T</b> P <b>A</b> Q <b>D</b> G <b>G</b> Q <b>P</b> | <b>H</b> Y <b>T</b> A <b>V</b> Q <b>R</b> K <b>M</b> T | <b>A</b> I <b>Y</b> F <b>S</b> L <b>S</b> T <b>D</b> N | <b>P</b> T <b>P</b> A <b>P</b> K <b>I</b> C <b>F</b> Y |    |
| MfmD   | <b>P</b> A <b>R</b> A <b>A</b> P <b>N</b> D <b>K</b> V | I <b>A</b> R <b>G</b> L <b>D</b> A <b>W</b> L <b>T</b>   | K <b>Y</b> N <b>W</b> H <b>D</b> G <b>G</b> K <b>S</b> | <b>V</b> E <b>R</b> V <b>E</b> S <b>V</b> E <b>T</b>   | <b>H</b> R <b>K</b> L <b>E</b> E <b>N</b> P <b>G</b> I | <b>F</b> T <b>F</b> I <b>G</b> L <b>G</b> R <b>K</b> E |    |
| PsetPT | <b>P</b> A <b>N</b> F <b>A</b> A <b>N</b> D <b>E</b> V | I <b>G</b> A <b>G</b> V <b>D</b> Q <b>W</b> L <b>Q</b>   | K <b>Y</b> G <b>W</b> D <b>D</b> G <b>S</b> K <b>P</b> | <b>M</b> K <b>E</b> K <b>V</b> R <b>S</b> V <b>E</b> T | <b>H</b> R <b>N</b> L <b>S</b> D <b>K</b> K <b>G</b> I | <b>F</b> T <b>F</b> L <b>G</b> I <b>G</b> R <b>K</b> E |    |
| MfmD   | <b>D</b> S <b>T</b> K <b>K</b> G <b>L</b> S <b>L</b> Q | <b>V</b> Y <b>M</b> T <b>P</b> E <b>L</b> Y <b>V</b> I   | <b>P</b> R <b>F</b> *                                  |                                                        |                                                        |                                                        |    |
| PsetPT | <b>D</b> P <b>T</b> K <b>K</b> E <b>L</b> S <b>M</b> Q | <b>V</b> Y <b>V</b> T <b>G</b> E <b>L</b> Y <b>T</b> I   | <b>P</b> R <b>I</b> *                                  |                                                        |                                                        |                                                        |    |

Figure S8. Sequence alignment of MfmD and PsetPT. The amino acid residues important for prenyl donor selectivity are boxed.

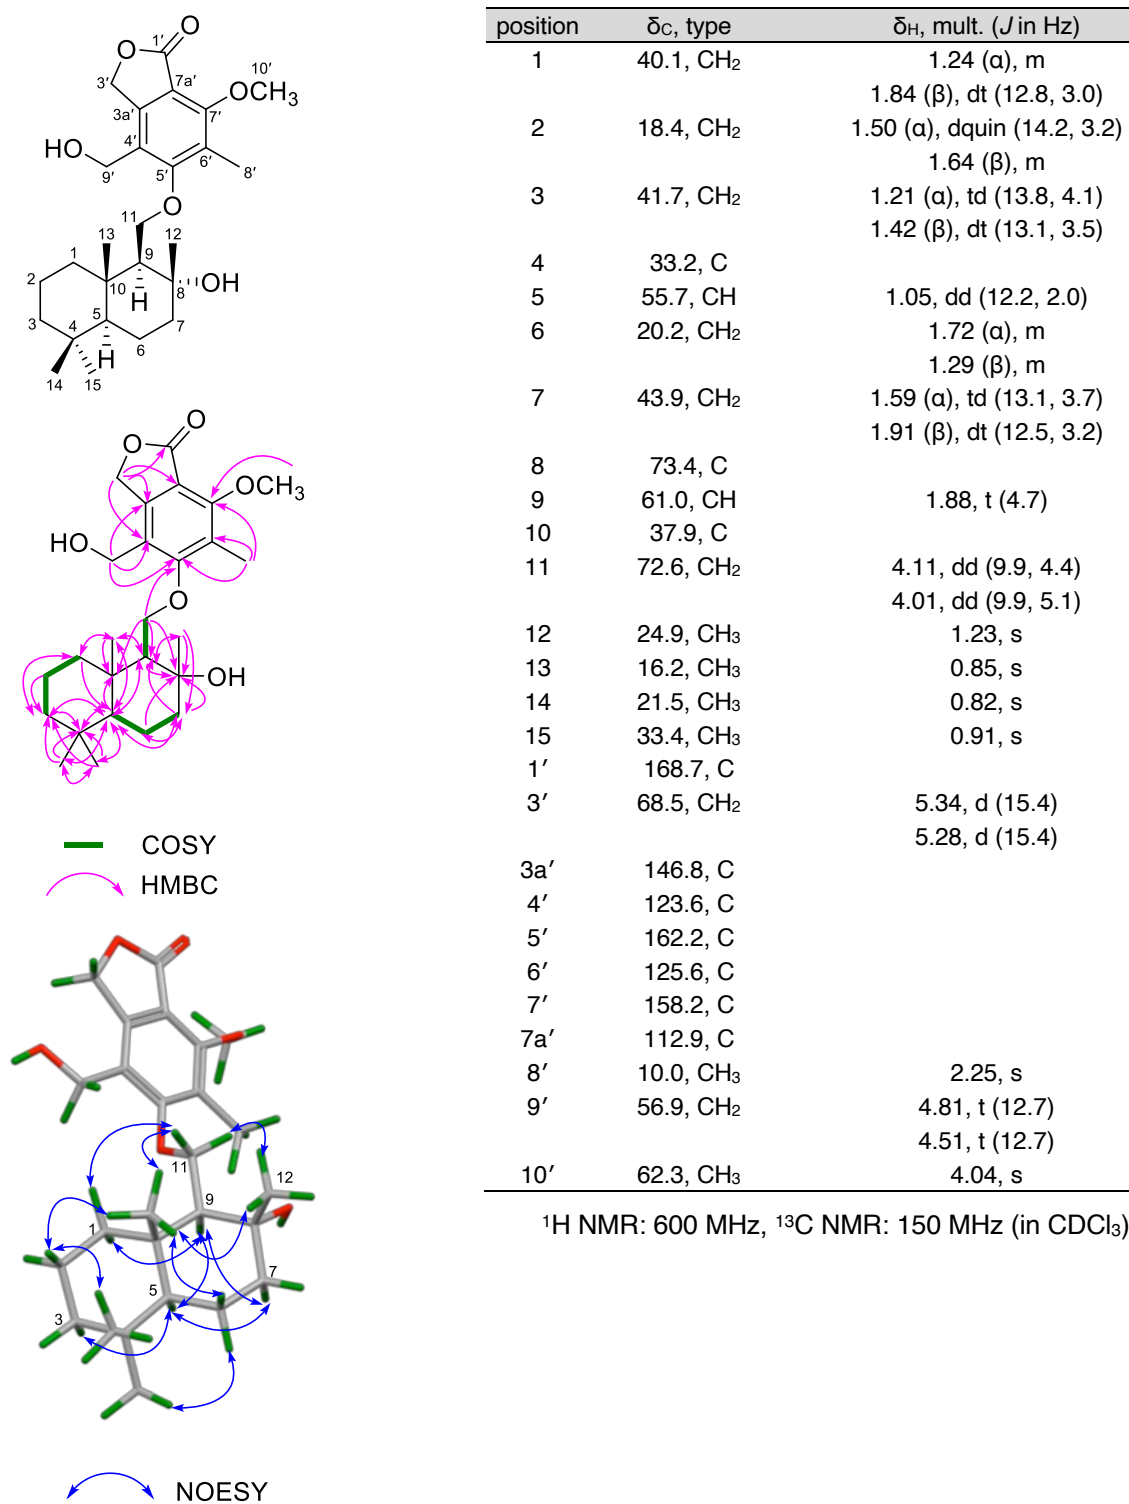

Figure S9. NMR data of **1'**.

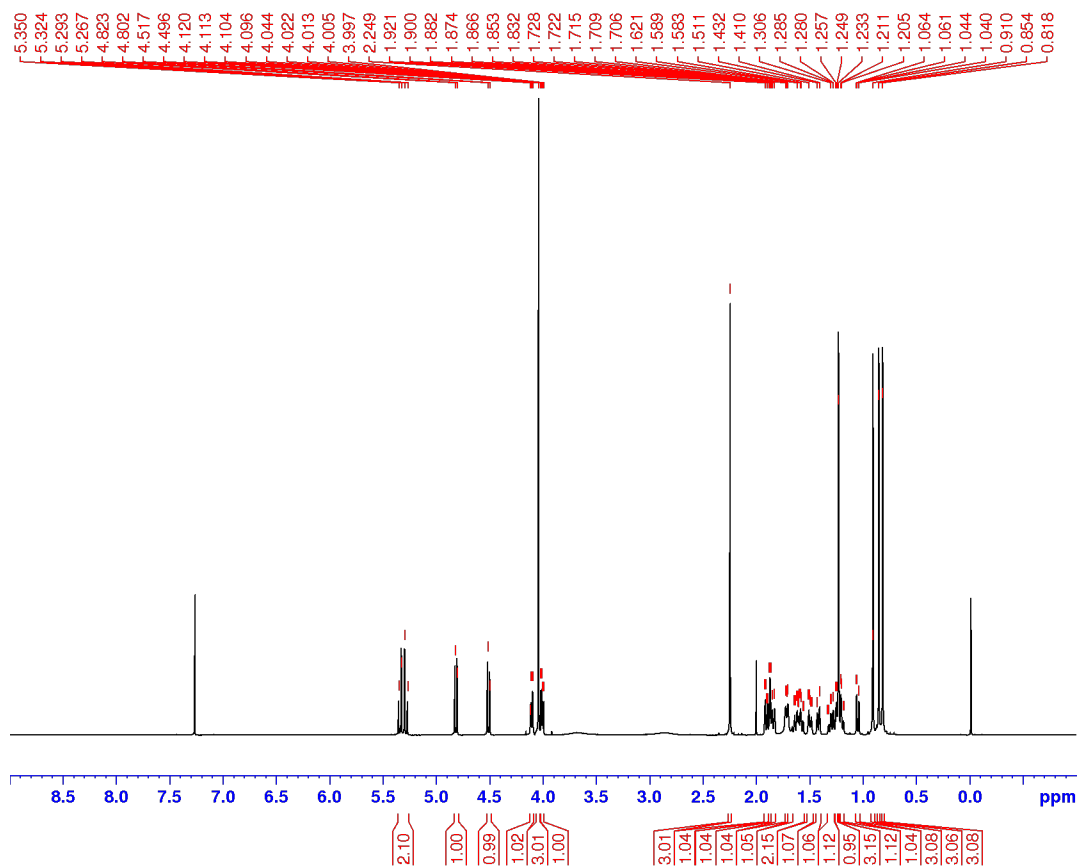

Figure S10.  $^1\text{H}$  NMR spectrum of **1'** in  $\text{CDCl}_3$  at 600 MHz.

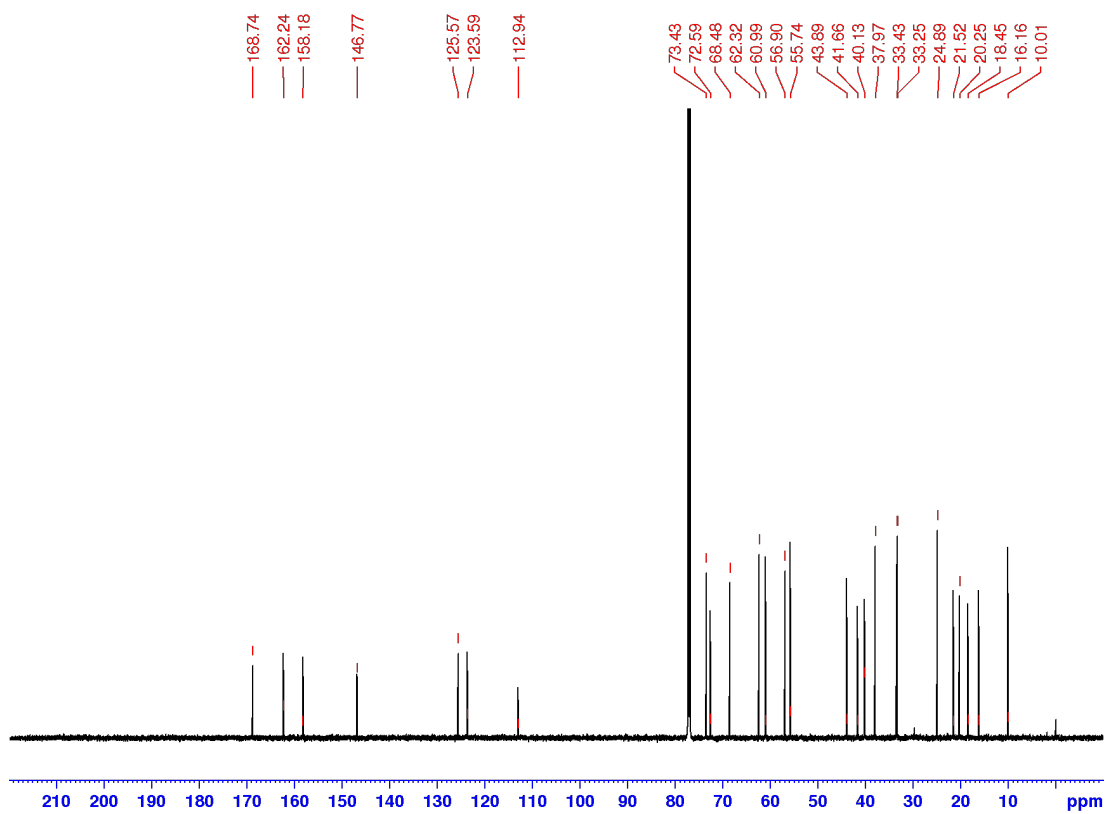

Figure S11.  $^{13}\text{C}\{^1\text{H}\}$  NMR spectrum of **1'** in  $\text{CDCl}_3$  at 150 MHz.



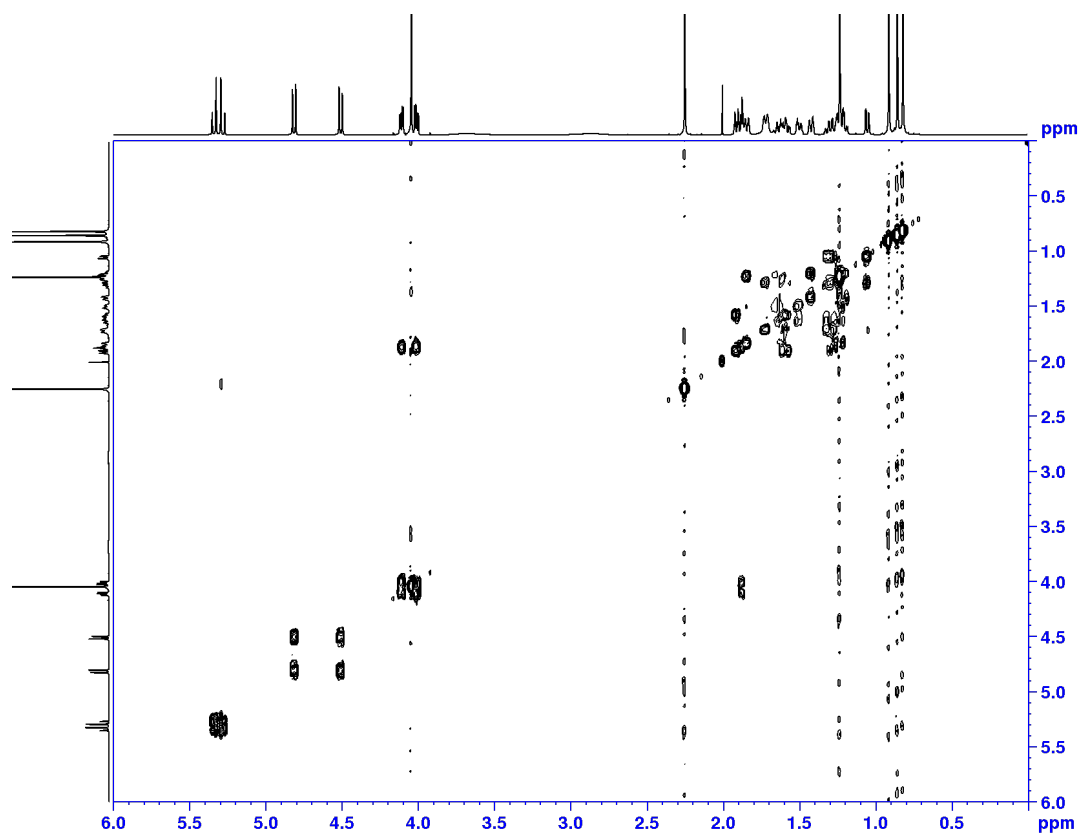

Figure S12.  $^1\text{H}$ - $^1\text{H}$  COSY spectrum of **1'** in  $\text{CDCl}_3$ .

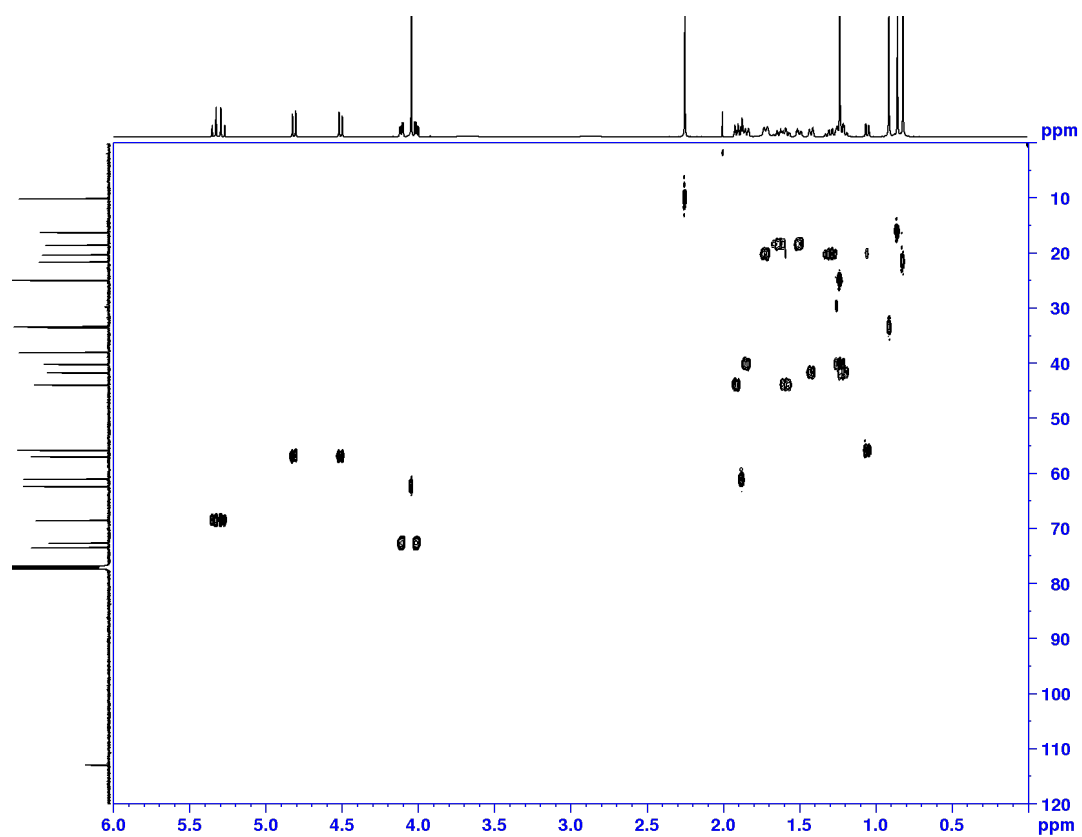

Figure S13. HSQC spectrum of **1'** in  $\text{CDCl}_3$ .

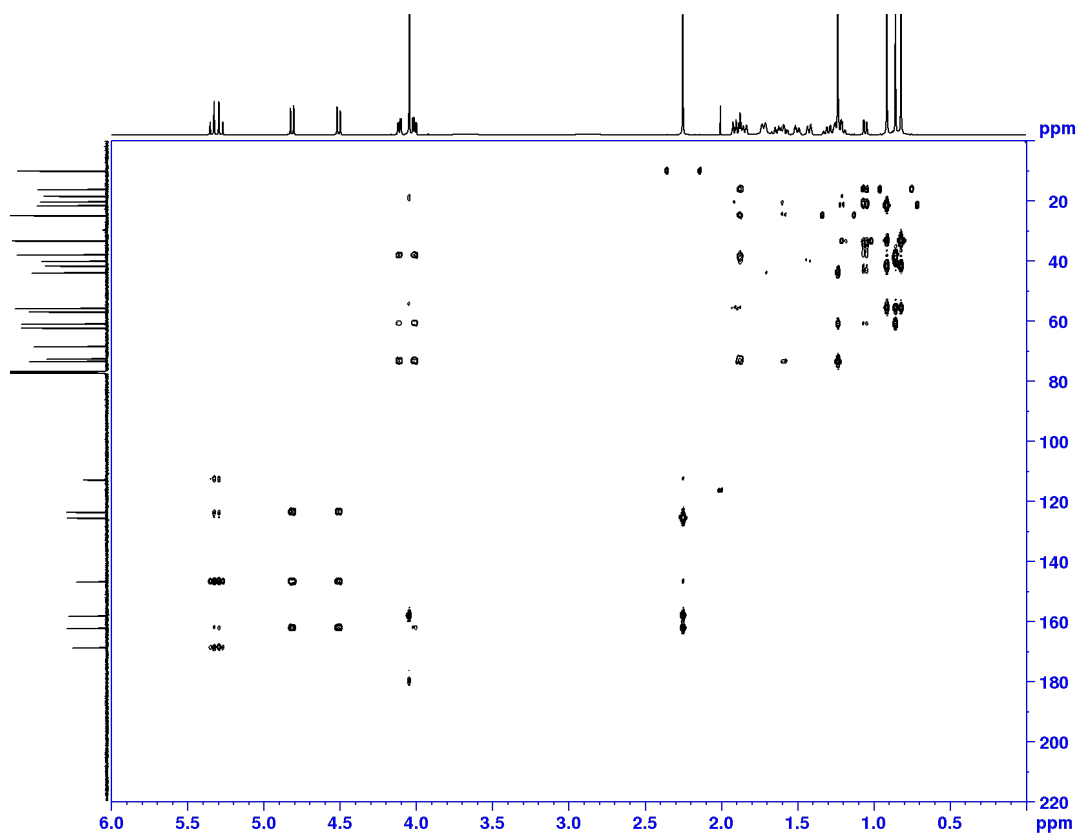

Figure S14. HMBC spectrum of **1'** in  $\text{CDCl}_3$ .

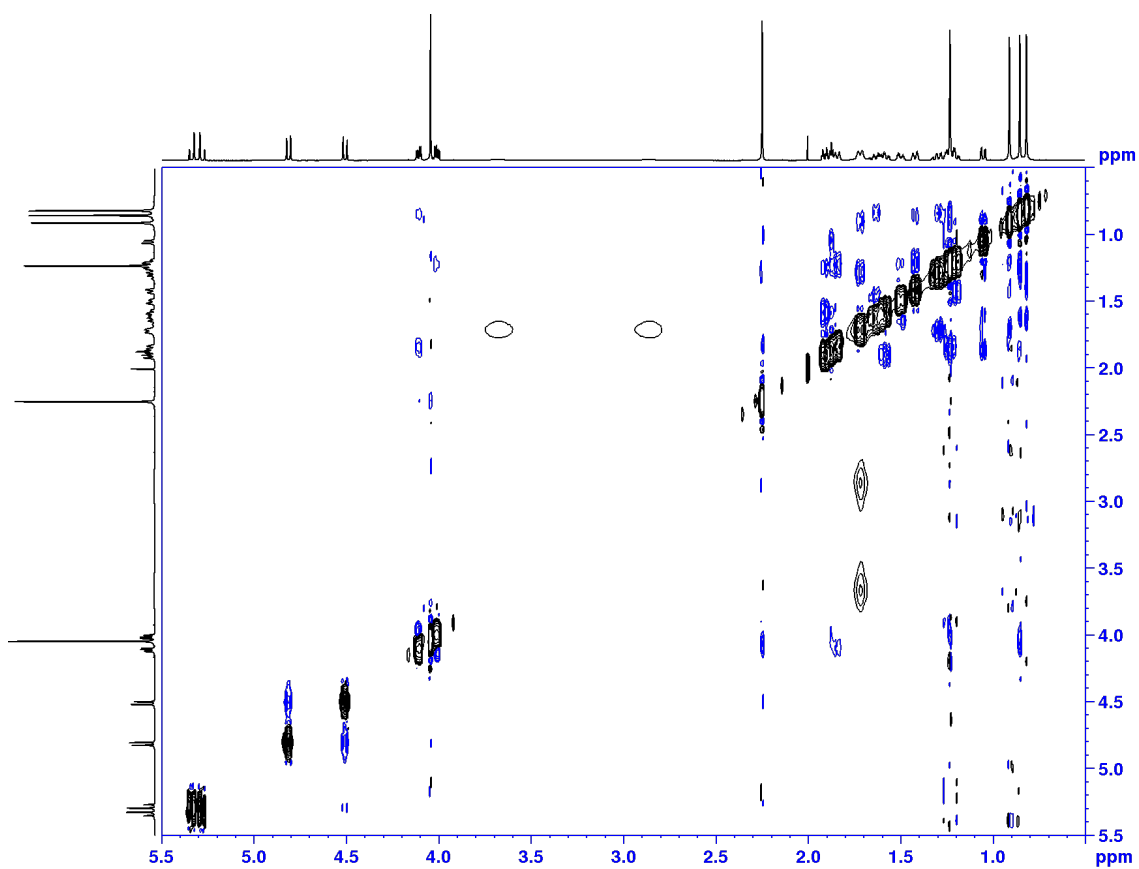

Figure S15. NOESY spectrum of **1'** in  $\text{CDCl}_3$ .

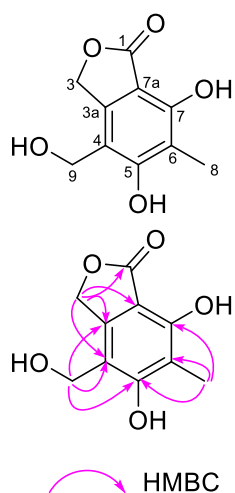

| position | $\delta_C$ , type     | $\delta_H$ , mult. ( <i>J</i> in Hz) |
|----------|-----------------------|--------------------------------------|
| 1        | 170.4, C              |                                      |
| 3        | 68.9, CH <sub>2</sub> | 5.29, s                              |
| 3a       | 144.4, C              |                                      |
| 4        | 114.1, C              |                                      |
| 5        | 159.5, C              |                                      |
| 6        | 111.6, C              |                                      |
| 7        | 153.6, C              |                                      |
| 7a       | 102.8, C              |                                      |
| 8        | 8.5, CH <sub>3</sub>  | 2.03, s                              |
| 9        | 56.8, CH <sub>2</sub> | 4.56, s                              |
| OH       |                       | 9.11, s                              |
| OH       |                       | 9.53, brs                            |

<sup>1</sup>H NMR: 600 MHz, <sup>13</sup>C NMR: 150 MHz (in DMSO-*d*<sub>6</sub>)

Figure S16. NMR data of **3**.

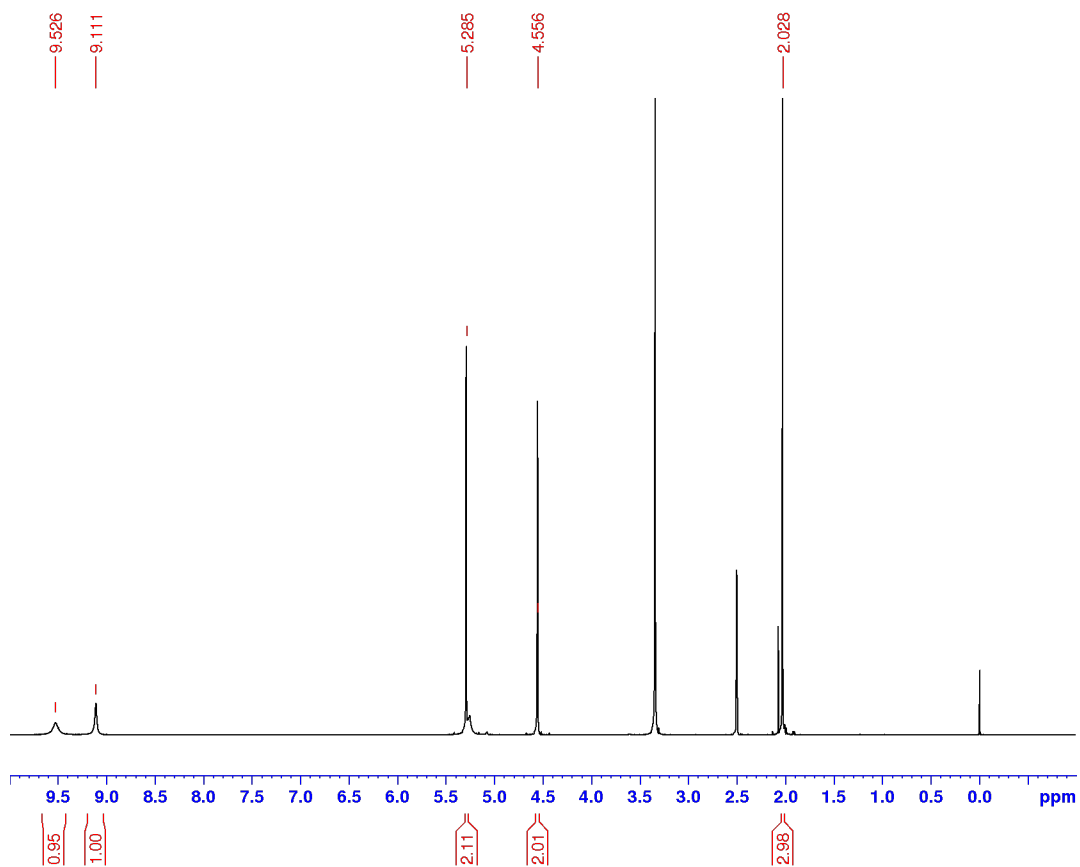

Figure S17.  $^1\text{H}$  NMR spectrum of **3** in  $\text{DMSO-}d_6$  at 600 MHz.

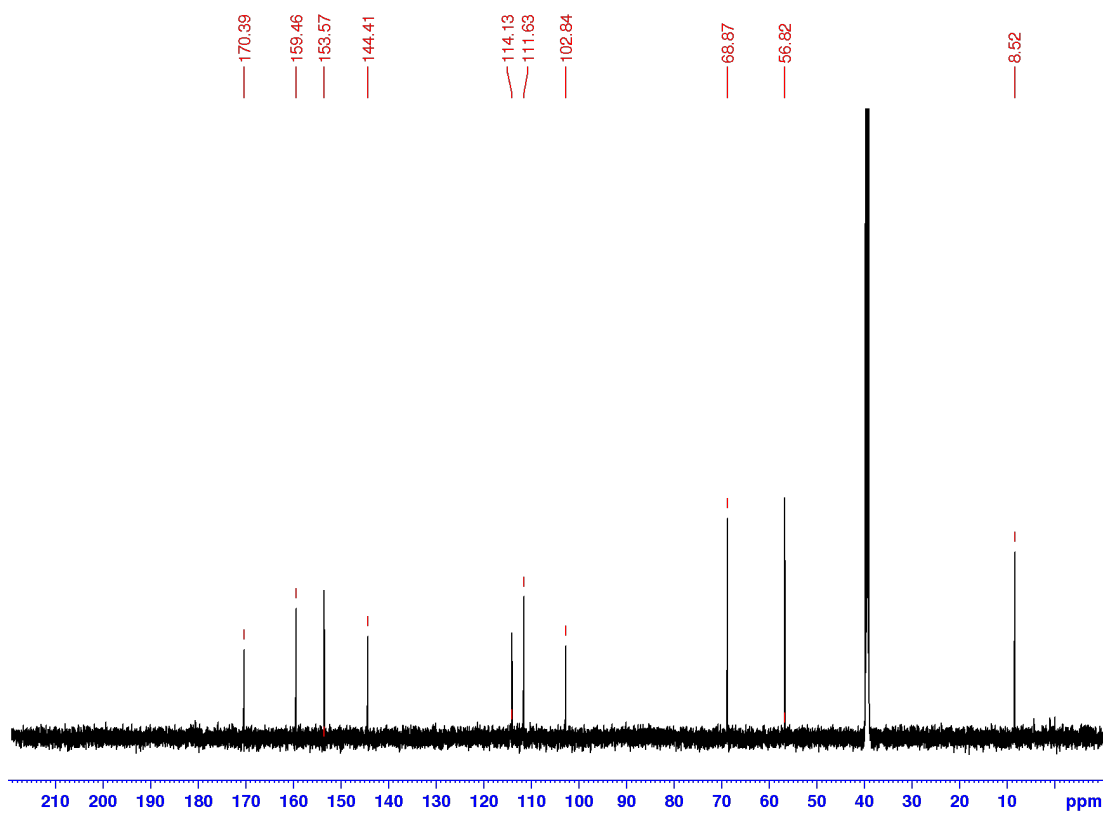

Figure S18.  $^{13}\text{C}\{^1\text{H}\}$  NMR spectrum of **3** in  $\text{DMSO-}d_6$  at 150 MHz.

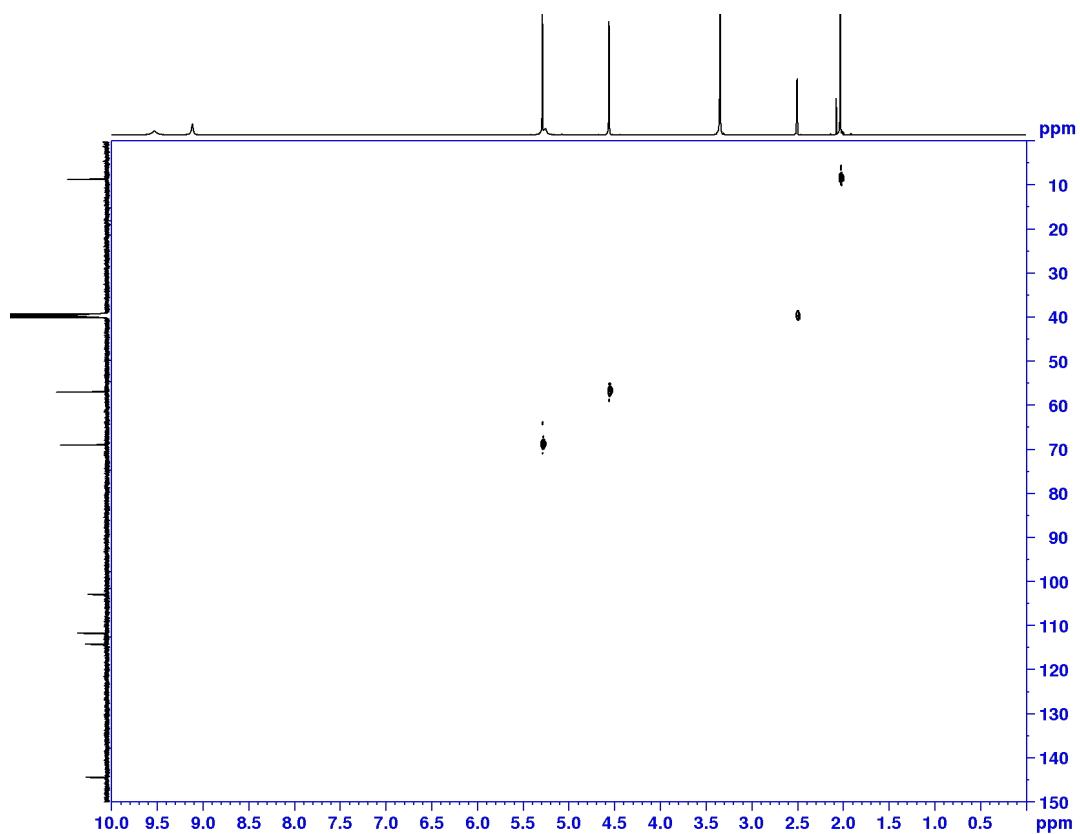

Figure S19. HSQC spectrum of **3** in DMSO-*d*<sub>6</sub>.

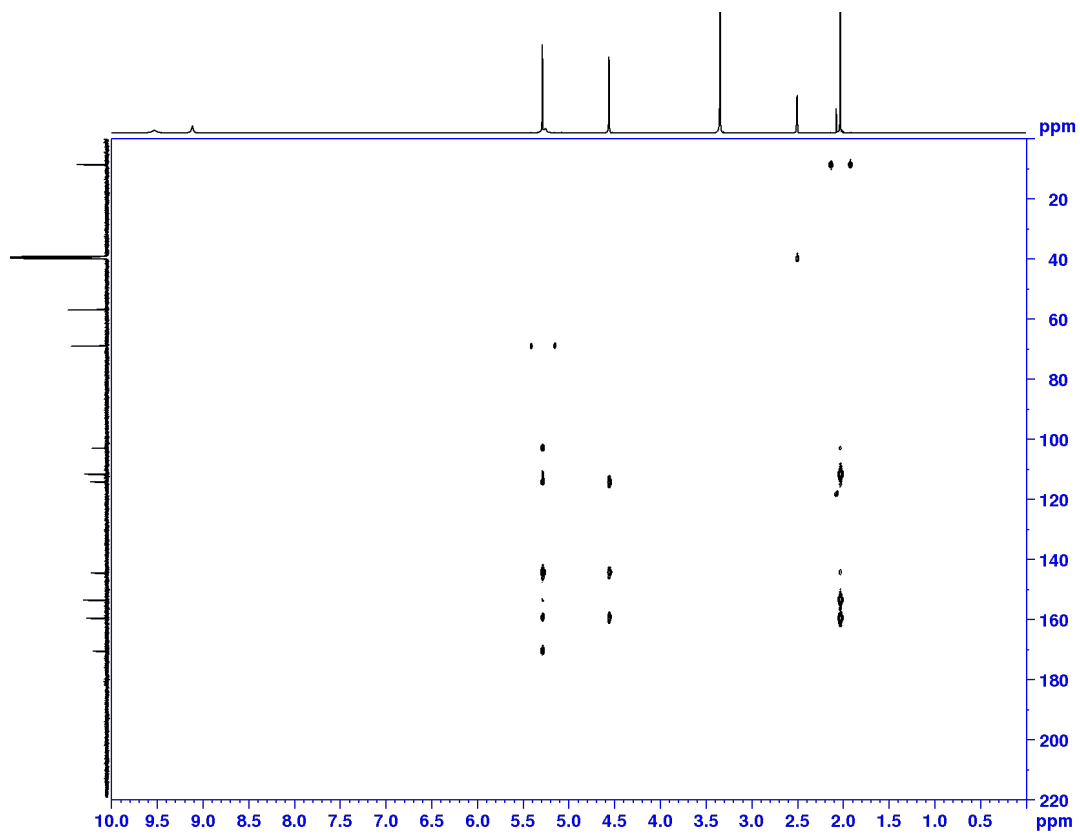

Figure S20. HMBC spectrum of **3** in DMSO-*d*<sub>6</sub>.

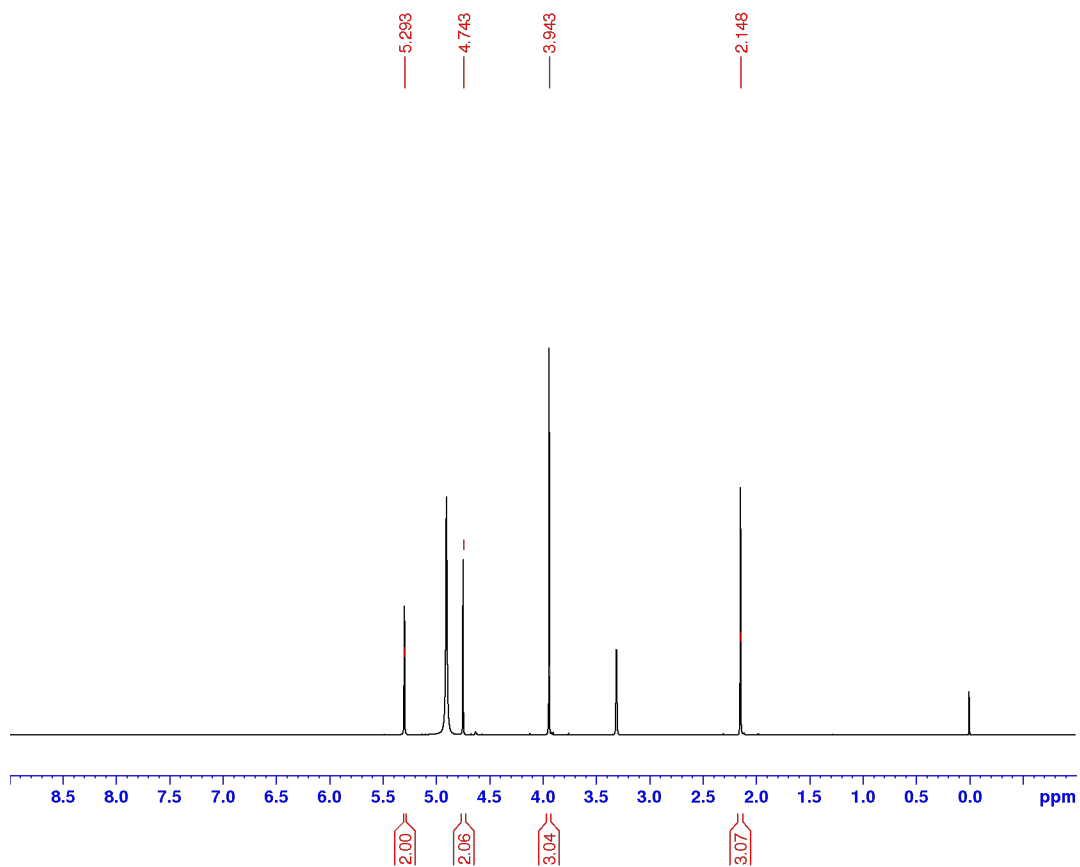

Figure S21. <sup>1</sup>H NMR spectrum of **4** in CD<sub>3</sub>OD at 400 MHz.

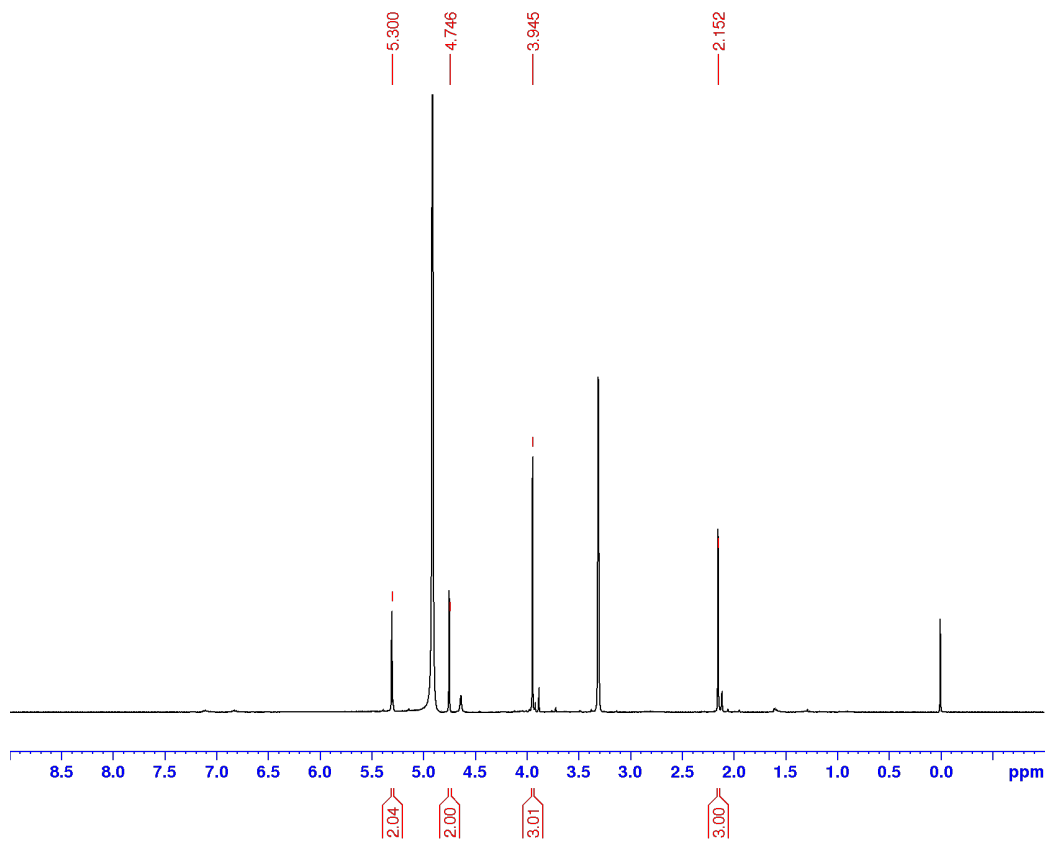

Figure S22. <sup>1</sup>H NMR spectrum of **4** (from the reduction of **5**) in CD<sub>3</sub>OD at 400 MHz.

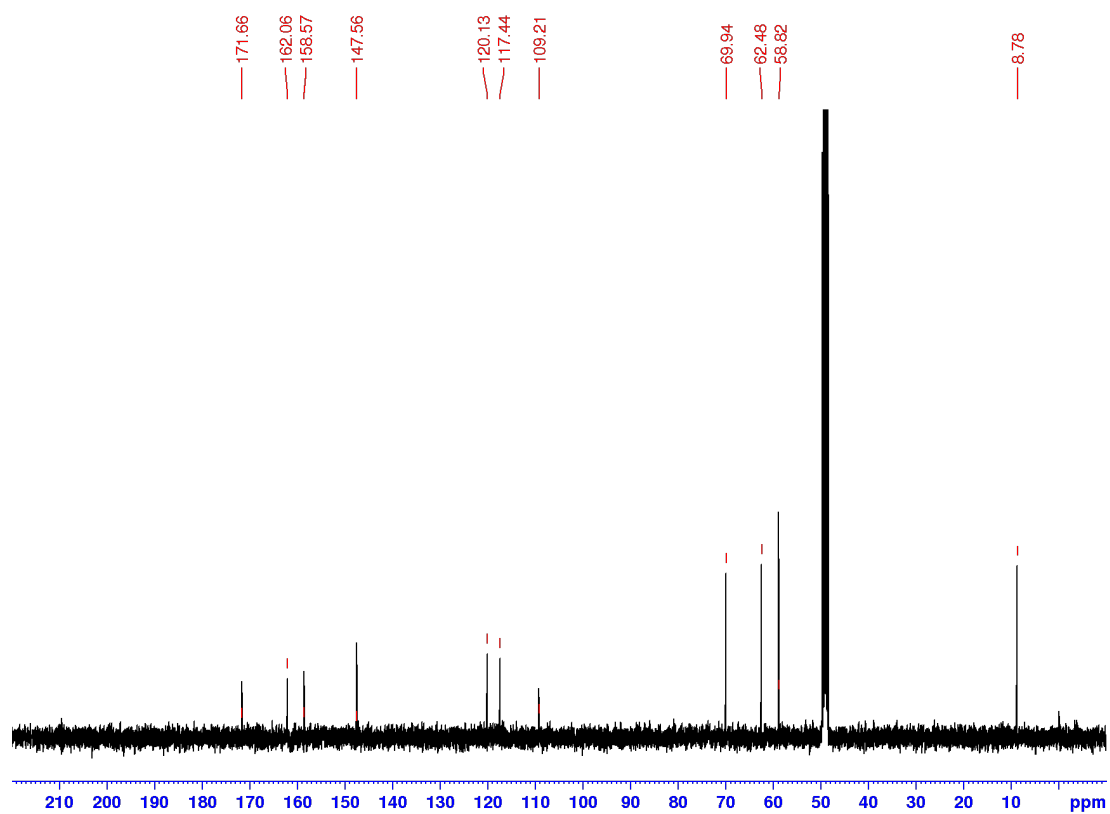

Figure S23.  $^{13}\text{C}\{^1\text{H}\}$  NMR spectrum of **4** in  $\text{CD}_3\text{OD}$  at 100 MHz.

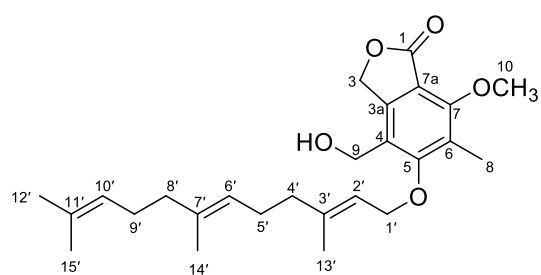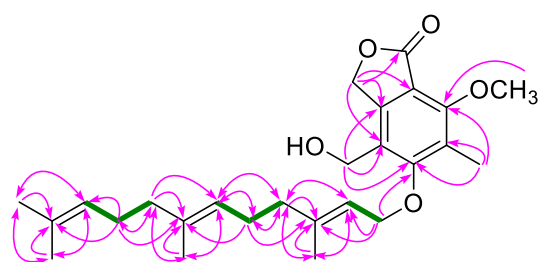

— COSY  
 HMBC

| position | $\delta_c$ , type     | $\delta_H$ , mult. ( <i>J</i> in Hz) |
|----------|-----------------------|--------------------------------------|
| 1        | 168.9, C              |                                      |
| 3        | 69.5, CH <sub>2</sub> | 5.40, s                              |
| 3a       | 147.9, C              |                                      |
| 4        | 125.9, C              |                                      |
| 5        | 161.8, C              |                                      |
| 6        | 125.9, C              |                                      |
| 7        | 158.1, C              |                                      |
| 7a       | 113.8, C              |                                      |
| 8        | 9.8, CH <sub>3</sub>  | 2.23, s                              |
| 9        | 57.9, CH <sub>2</sub> | 4.81, s                              |
| 10       | 62.2, CH <sub>3</sub> | 4.00, s                              |
| 1'       | 71.5, CH <sub>2</sub> | 4.48, d (7.1)                        |
| 2'       | 127.0, CH             | 5.59, tq (7.1, 1.2)                  |
| 3'       | 142.2, C              |                                      |
| 4'       | 40.2, CH <sub>2</sub> | 2.10, brt (6.7)                      |
| 5'       | 27.0, CH <sub>2</sub> | 2.16, m                              |
| 6'       | 124.6, CH             | 5.16, tq (7.0, 1.1)                  |
| 7'       | 136.0, C              |                                      |
| 8'       | 40.4, CH <sub>2</sub> | 1.99, brt (7.5)                      |
| 9'       | 27.4, CH <sub>2</sub> | 2.08, m                              |
| 10'      | 125.1, CH             | 5.11, tsept (7.1, 1.2)               |
| 11'      | 131.7, C              |                                      |
| 12'      | 25.8, CH <sub>3</sub> | 1.65, s                              |
| 13'      | 16.5, CH <sub>3</sub> | 1.70, s                              |
| 14'      | 16.1, CH <sub>3</sub> | 1.62, s                              |
| 15'      | 17.7, CH <sub>3</sub> | 1.59, s                              |

<sup>1</sup>H NMR: 600 MHz, <sup>13</sup>C NMR: 150 MHz (in acetone-*d*<sub>6</sub>)

Figure S24. NMR data of **6'**.



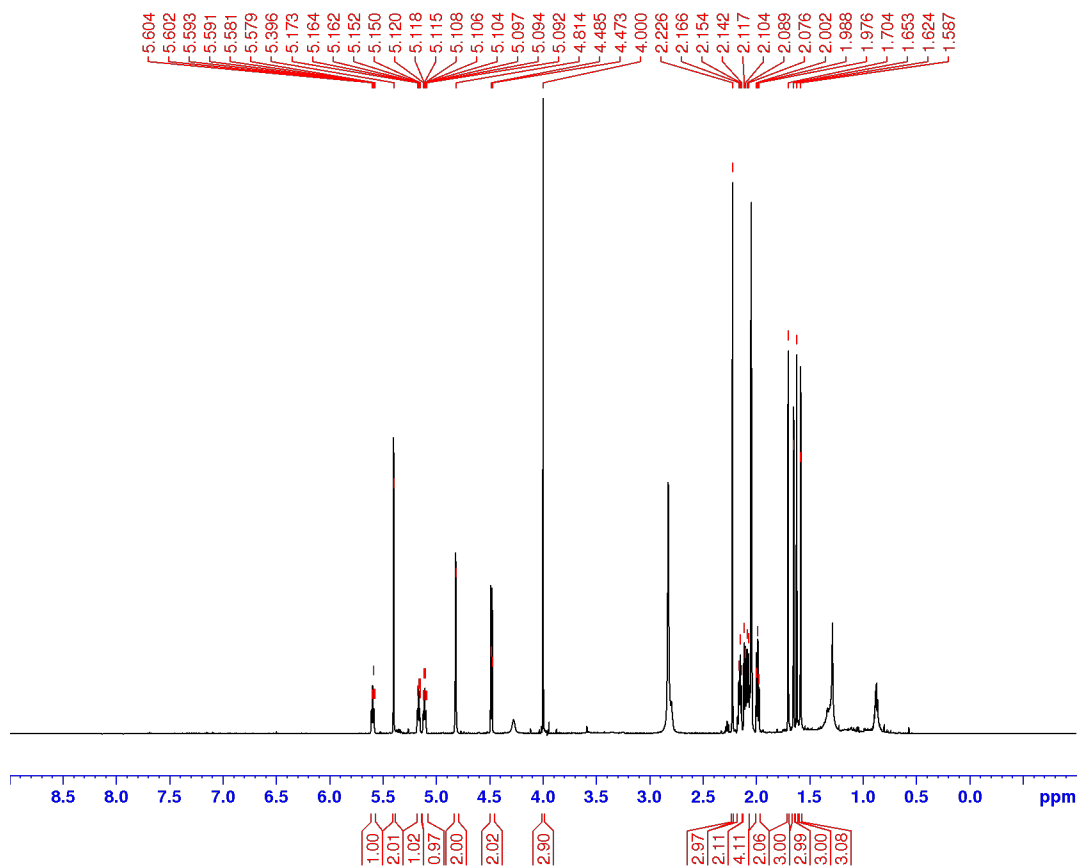

Figure S25.  $^1\text{H}$  NMR spectrum of **6'** in acetone- $d_6$  at 600 MHz.

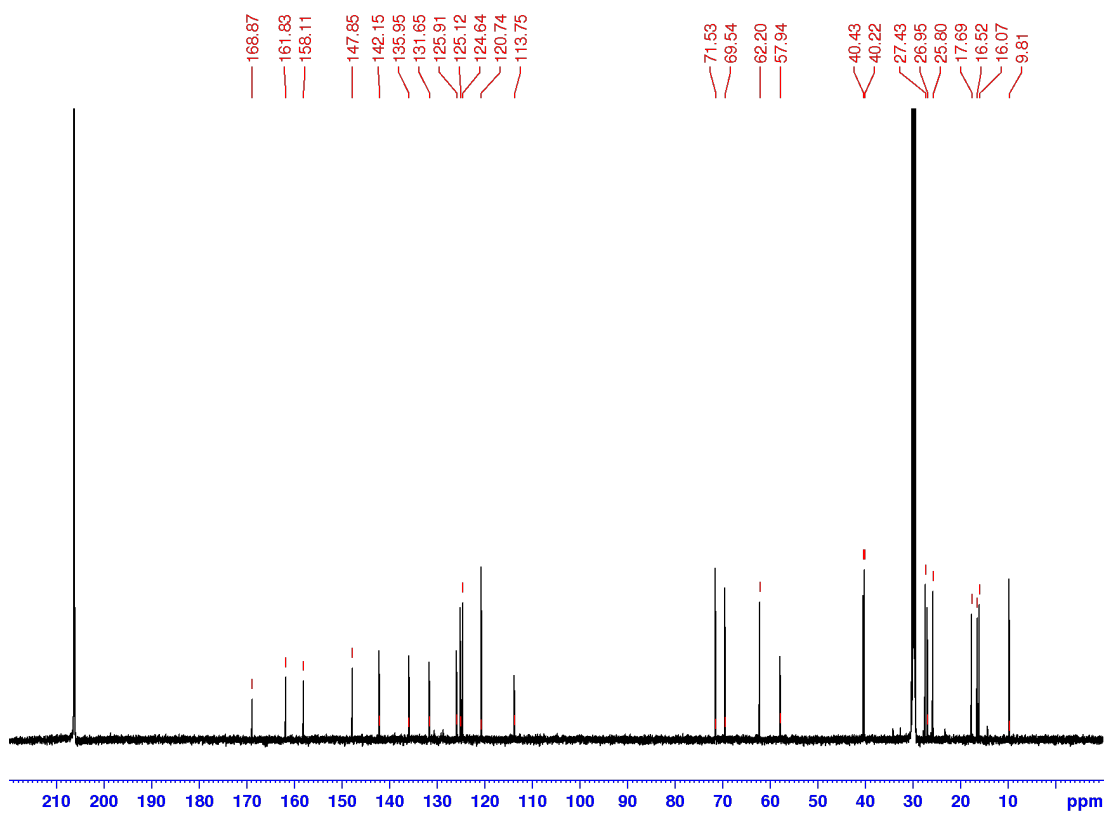

Figure S26.  $^{13}\text{C}\{^1\text{H}\}$  NMR spectrum of **6'** in acetone- $d_6$  at 150 MHz.

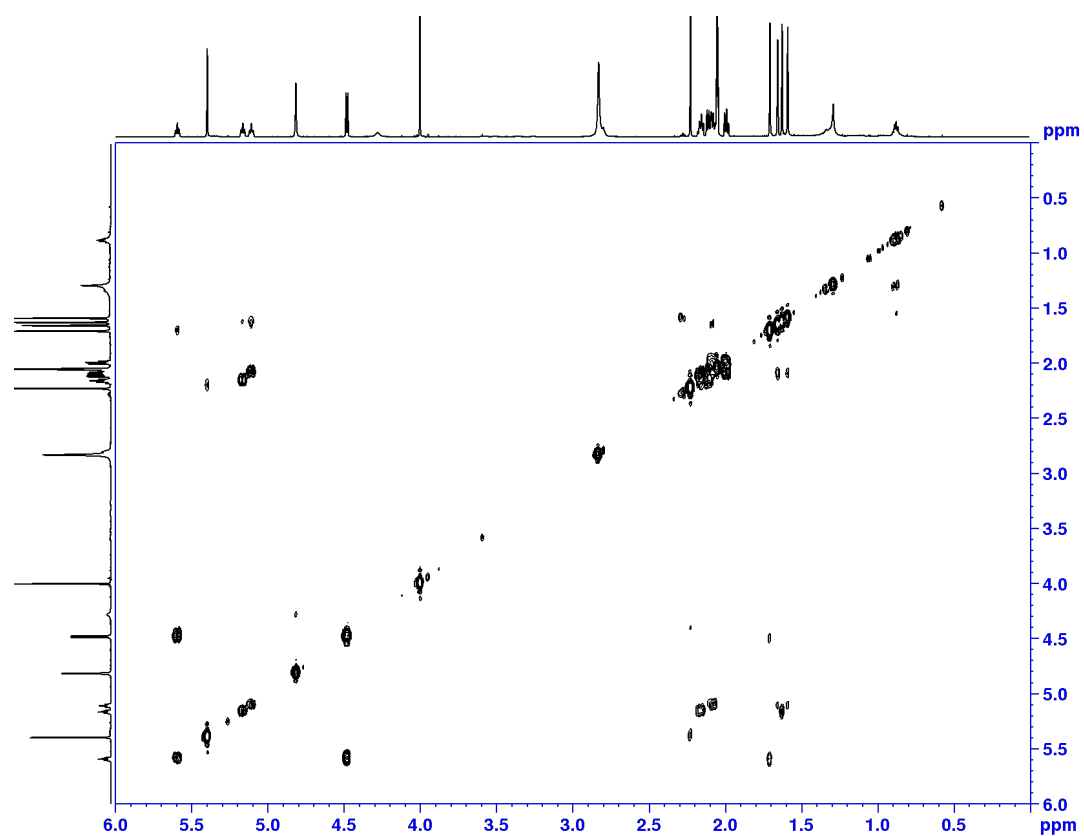

Figure S27.  $^1\text{H}$ - $^1\text{H}$  COSY spectrum of **6'** in acetone- $d_6$ .

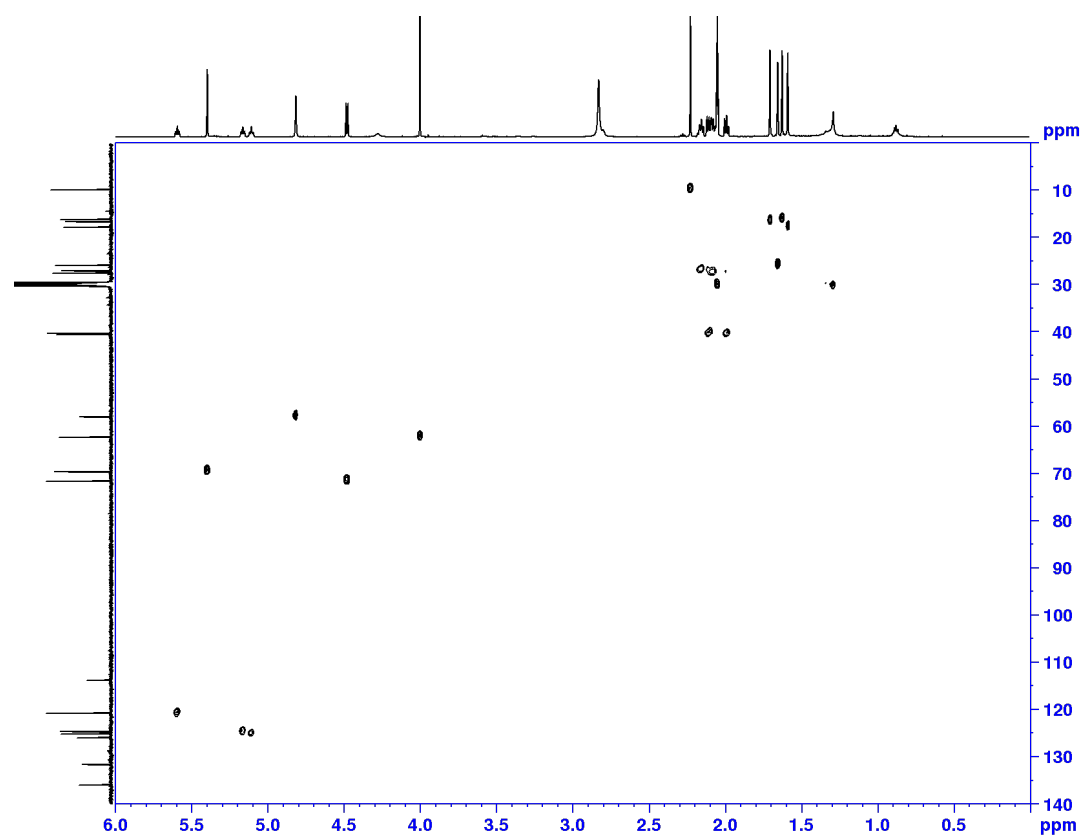

Figure S28. HSQC spectrum of **6'** in acetone- $d_6$ .

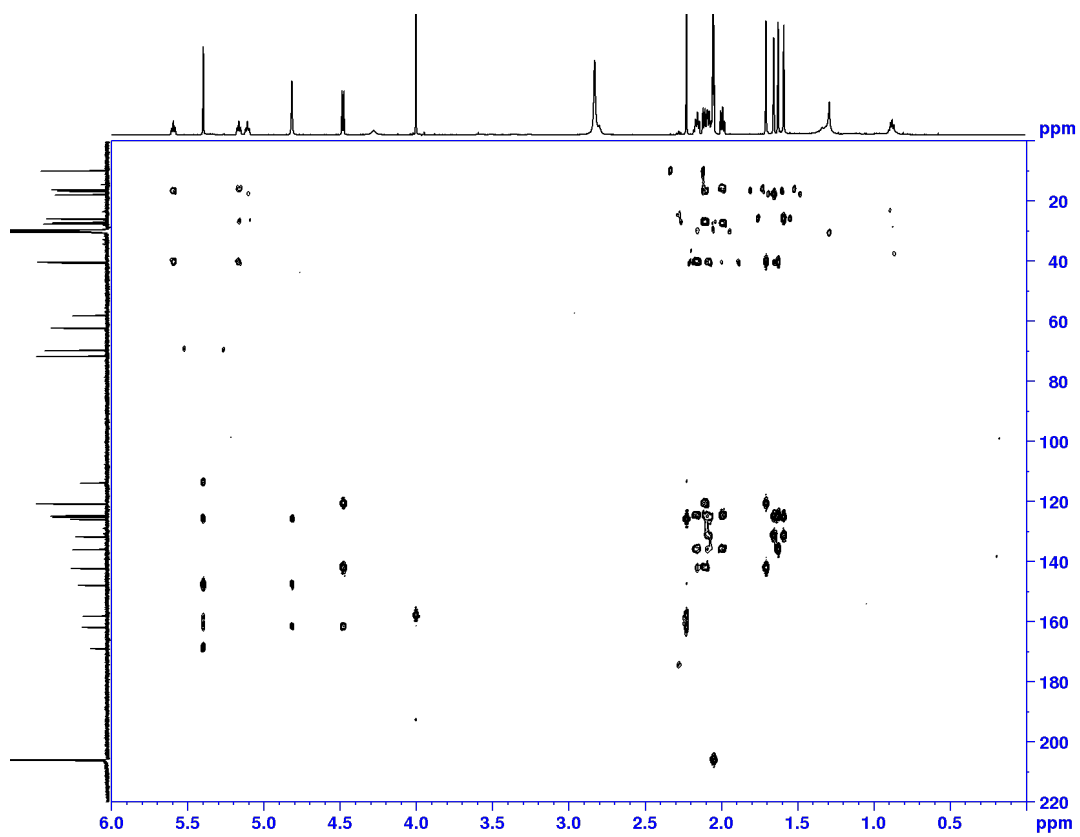

Figure S29. HMBC spectrum of **6'** in acetone-*d*<sub>6</sub>.

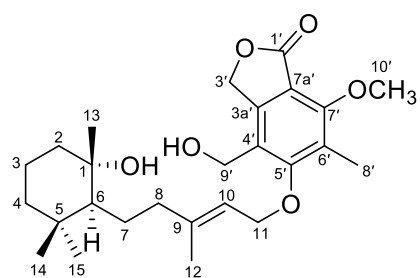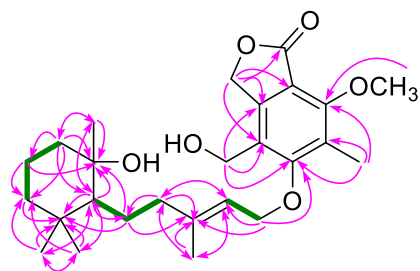

— COSY  
 ↷ HMBC

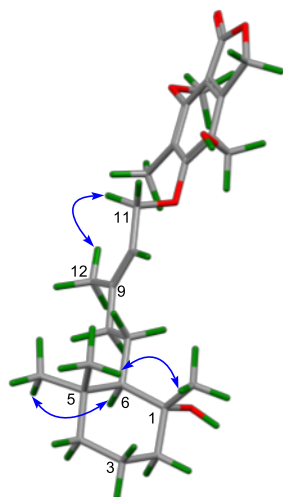

↔ NOESY

| position | $\delta_C$ , type     | $\delta_H$ , mult. ( $J$ in Hz)                          |
|----------|-----------------------|----------------------------------------------------------|
| 1        | 73.6, C               |                                                          |
| 2        | 44.2, CH <sub>2</sub> | 1.38 (α), overlapped<br>1.69 (β), overlapped             |
| 3        | 21.2, CH <sub>2</sub> | 1.49, m                                                  |
| 4        | 42.4, CH <sub>2</sub> | 1.21 (α), td (12.6, 5.3)<br>1.36 (β), dt (11.8, 3.2)     |
| 5        | 36.1, C               |                                                          |
| 6        | 57.3, CH              | 1.19 (α), t (4.4)                                        |
| 7        | 25.5, CH <sub>2</sub> | 1.69, m<br>1.40, m                                       |
| 8        | 43.5, CH <sub>2</sub> | 2.34, ddd (13.9, 9.7, 5.5)<br>2.13, ddd (13.9, 9.6, 5.3) |
| 9        | 143.9, C              |                                                          |
| 10       | 119.9, CH             | 5.58, tq (7.1, 1.0)                                      |
| 11       | 71.5, CH <sub>2</sub> | 4.48, d (7.1)                                            |
| 12       | 16.7, CH <sub>3</sub> | 1.70, brs                                                |
| 13       | 23.7, CH <sub>3</sub> | 1.14, s                                                  |
| 14       | 21.8, CH <sub>3</sub> | 0.84, s                                                  |
| 15       | 33.3, CH <sub>3</sub> | 0.96, s                                                  |
| 1'       | 168.9, C              |                                                          |
| 3'       | 69.6, CH <sub>2</sub> | 5.40, s                                                  |
| 3a'      | 147.8, C              |                                                          |
| 4'       | 126.0, C              |                                                          |
| 5'       | 161.8, C              |                                                          |
| 6'       | 126.0, C              |                                                          |
| 7'       | 158.1, C              |                                                          |
| 7a'      | 113.7, C              |                                                          |
| 8'       | 9.9, CH <sub>3</sub>  | 2.23, s                                                  |
| 9'       | 58.0, CH <sub>2</sub> | 4.82, s                                                  |
| 10'      | 62.2, CH <sub>3</sub> | 4.00, s                                                  |

<sup>1</sup>H NMR: 600 MHz, <sup>13</sup>C NMR: 150 MHz (in acetone-*d*<sub>6</sub>)

Figure S30. NMR data of 7'.

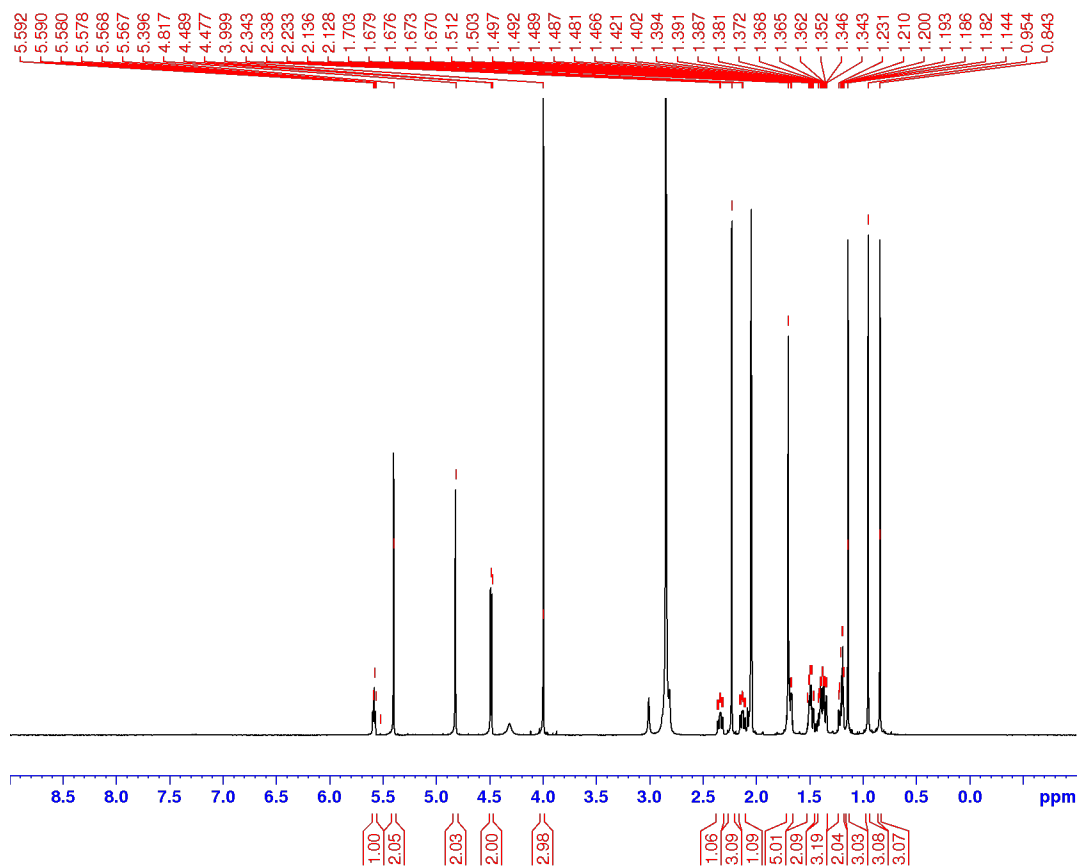

Figure S31.  $^1\text{H}$  NMR spectrum of **7'** in acetone- $d_6$  at 600 MHz.

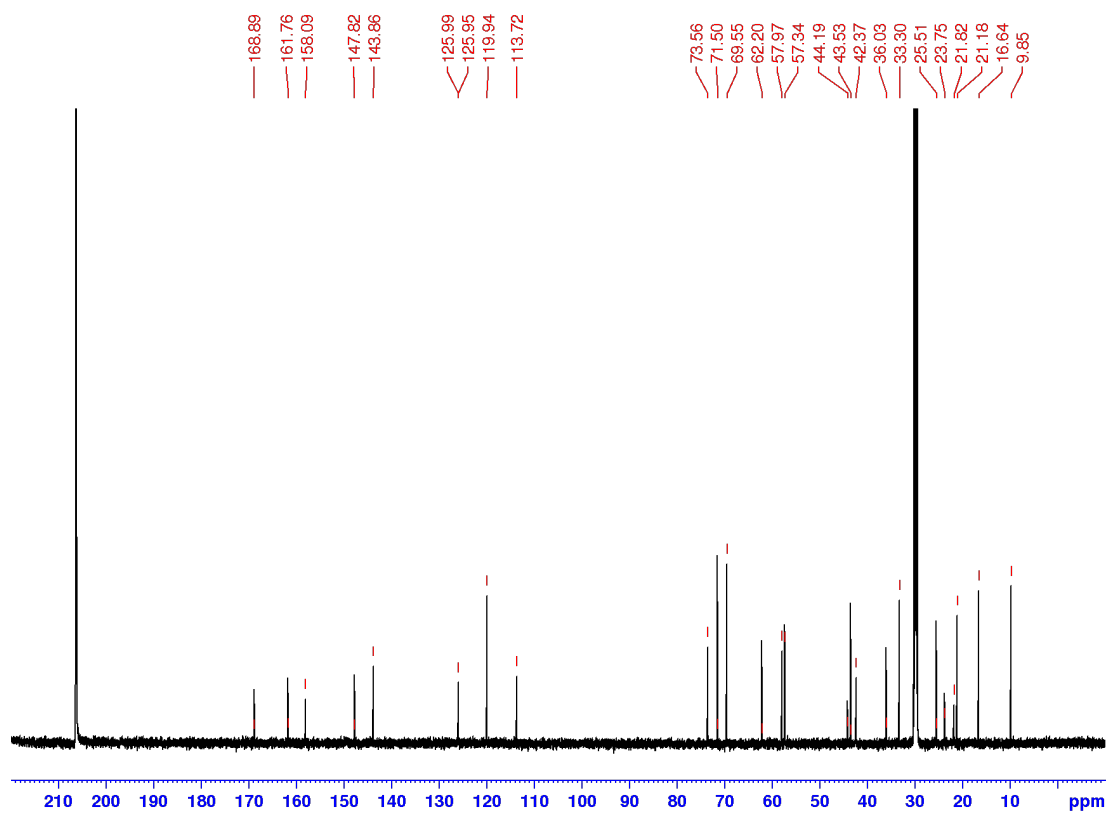

Figure S32.  $^{13}\text{C}\{^1\text{H}\}$  NMR spectrum of **7'** in acetone- $d_6$  at 150 MHz.

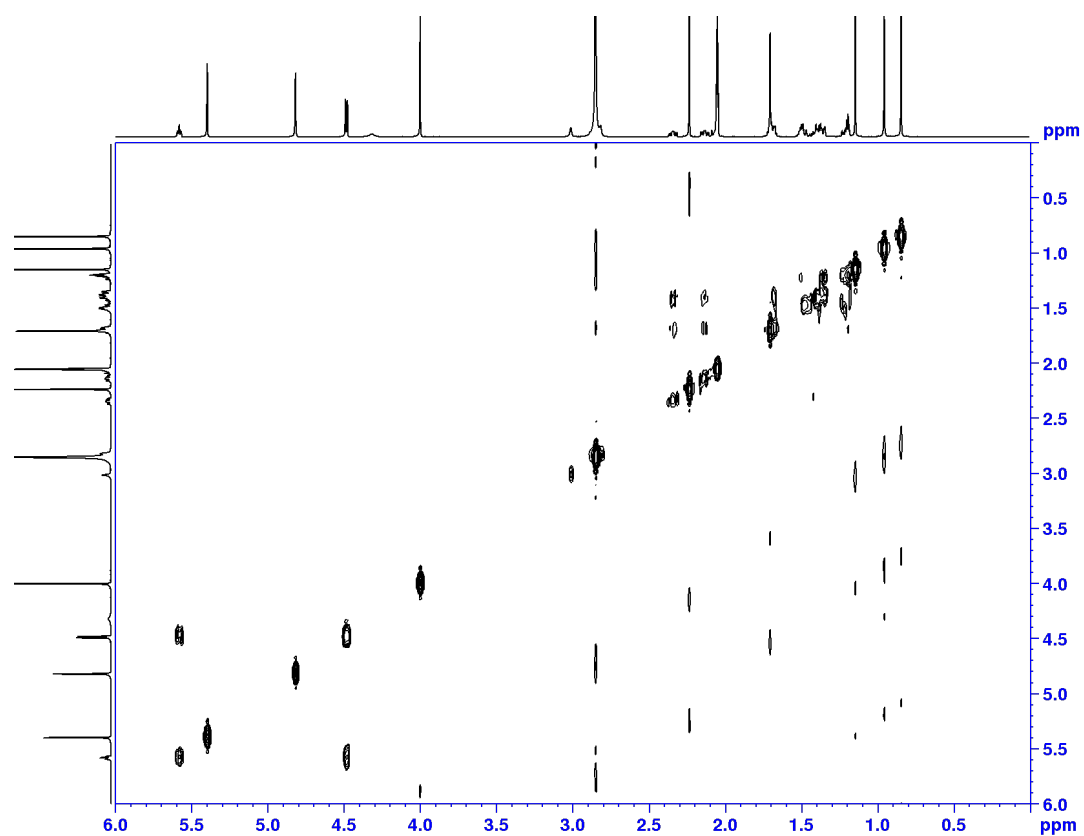

Figure S33.  $^1\text{H}$ - $^1\text{H}$  COSY spectrum of **7'** in acetone- $d_6$ .

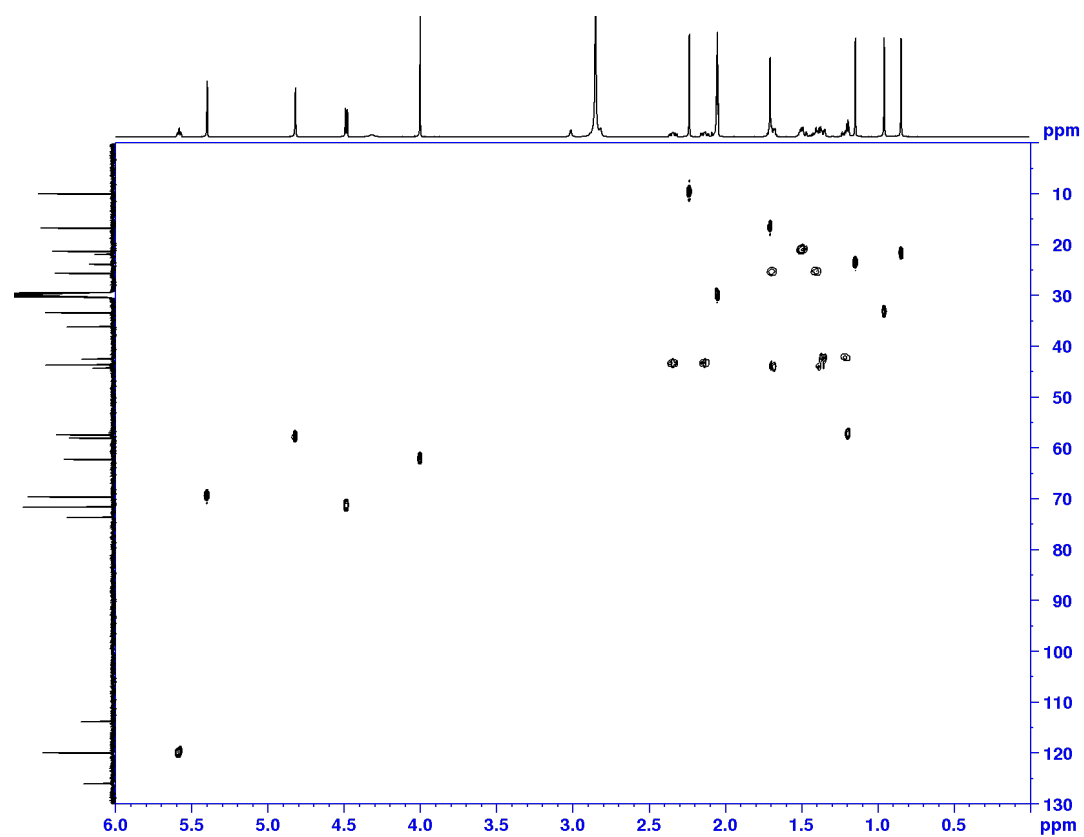

Figure S34. HSQC spectrum of **7'** in acetone- $d_6$ .

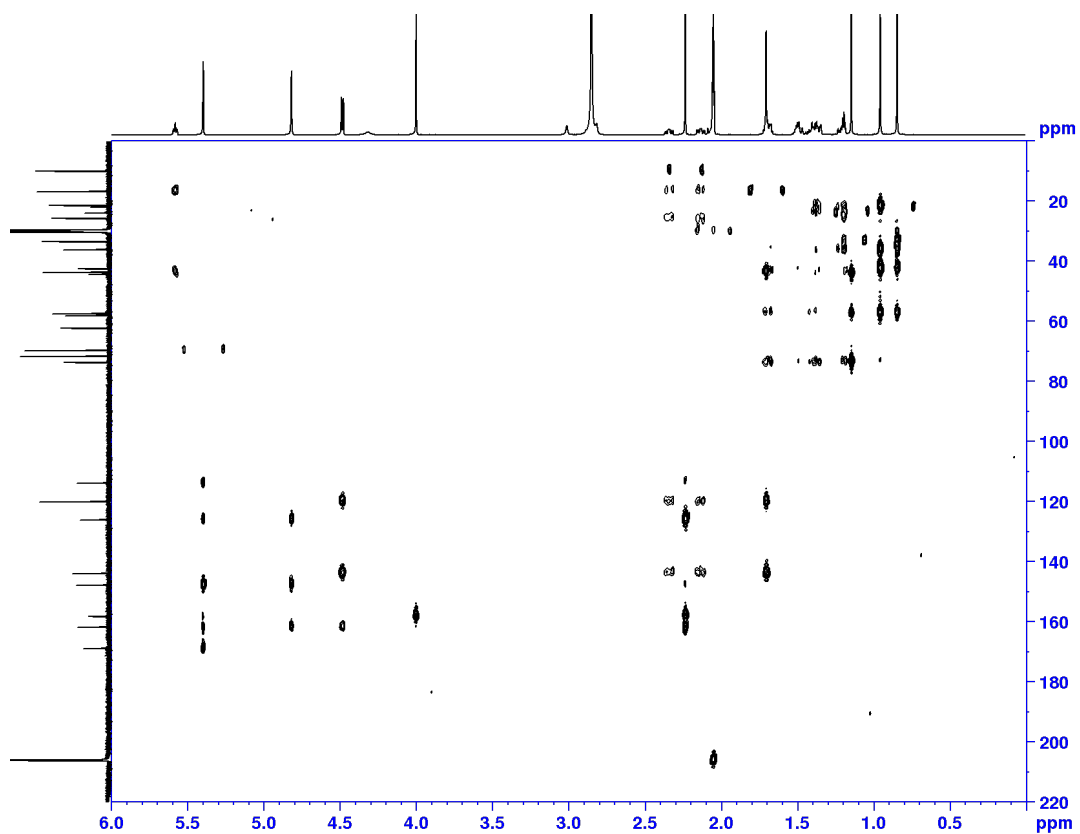

Figure S35. HMBC spectrum of 7' in acetone- $d_6$ .

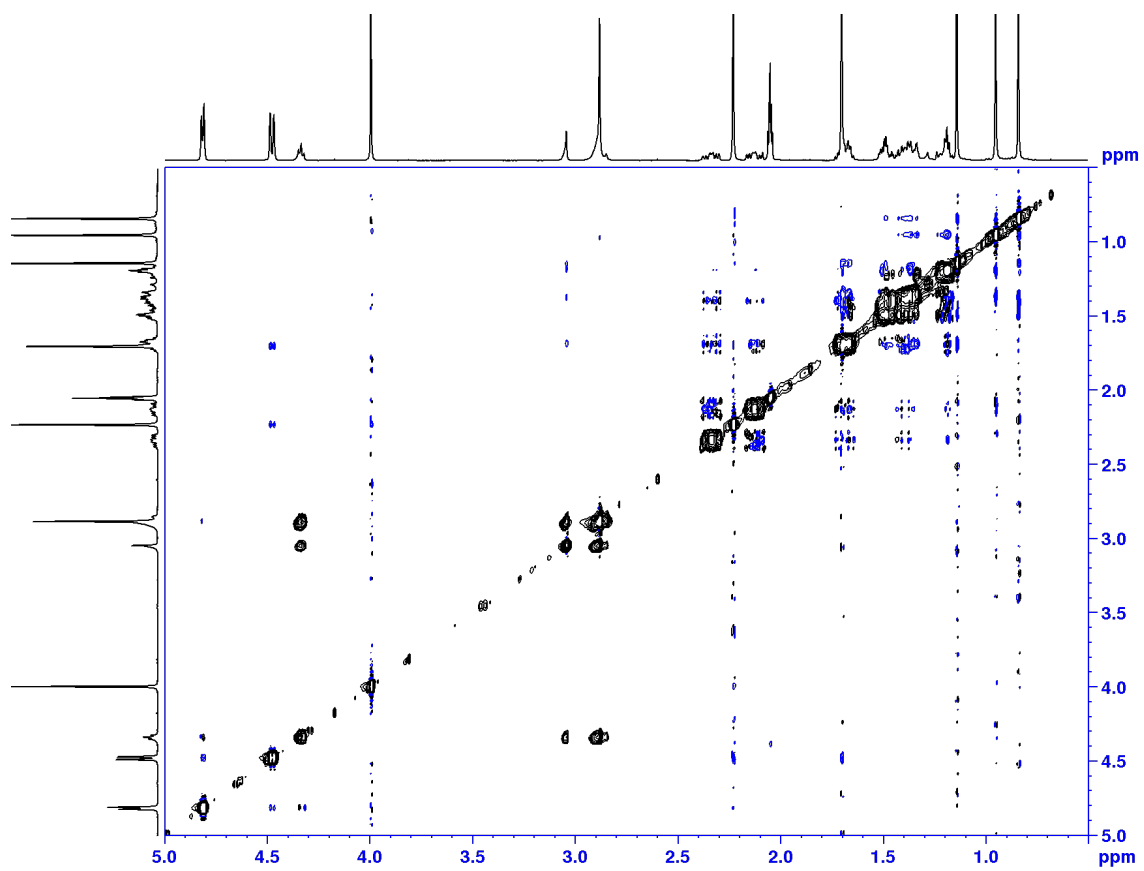

Figure S36. NOESY spectrum of 7' in  $CDCl_3$ .

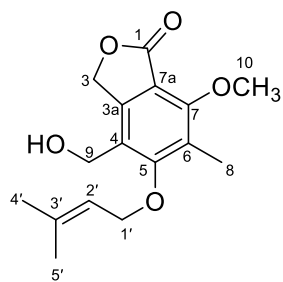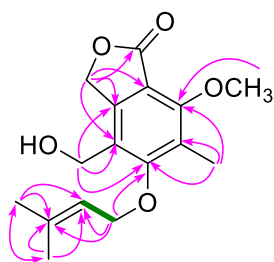

— COSY  
 ↷ HMBC

| position | $\delta_C$ , type     | $\delta_H$ , mult. ( <i>J</i> in Hz) |
|----------|-----------------------|--------------------------------------|
| 1        | 171.1, C              |                                      |
| 3        | 70.5, CH <sub>2</sub> | 5.42, s                              |
| 3a       | 148.5, C              |                                      |
| 4        | 126.1, C              |                                      |
| 5        | 162.9, C              |                                      |
| 6        | 126.9, C              |                                      |
| 7        | 158.9, C              |                                      |
| 7a       | 114.0, C              |                                      |
| 8        | 9.8, CH <sub>3</sub>  | 2.24, s                              |
| 9        | 58.0, CH <sub>2</sub> | 4.75, s                              |
| 10       | 62.6, CH <sub>3</sub> | 3.99, s                              |
| 1'       | 72.0, CH <sub>2</sub> | 4.44, d (7.2)                        |
| 2'       | 120.9, CH             | 5.56, tsept (7.3, 1.3)               |
| 3'       | 139.9, C              |                                      |
| 4'       | 25.9, CH <sub>2</sub> | 1.80, s                              |
| 5'       | 18.1, CH <sub>2</sub> | 1.70, s                              |

<sup>1</sup>H NMR: 600 MHz, <sup>13</sup>C NMR: 150 MHz (in CD<sub>3</sub>OD)

Figure S37. NMR data of **8'**.



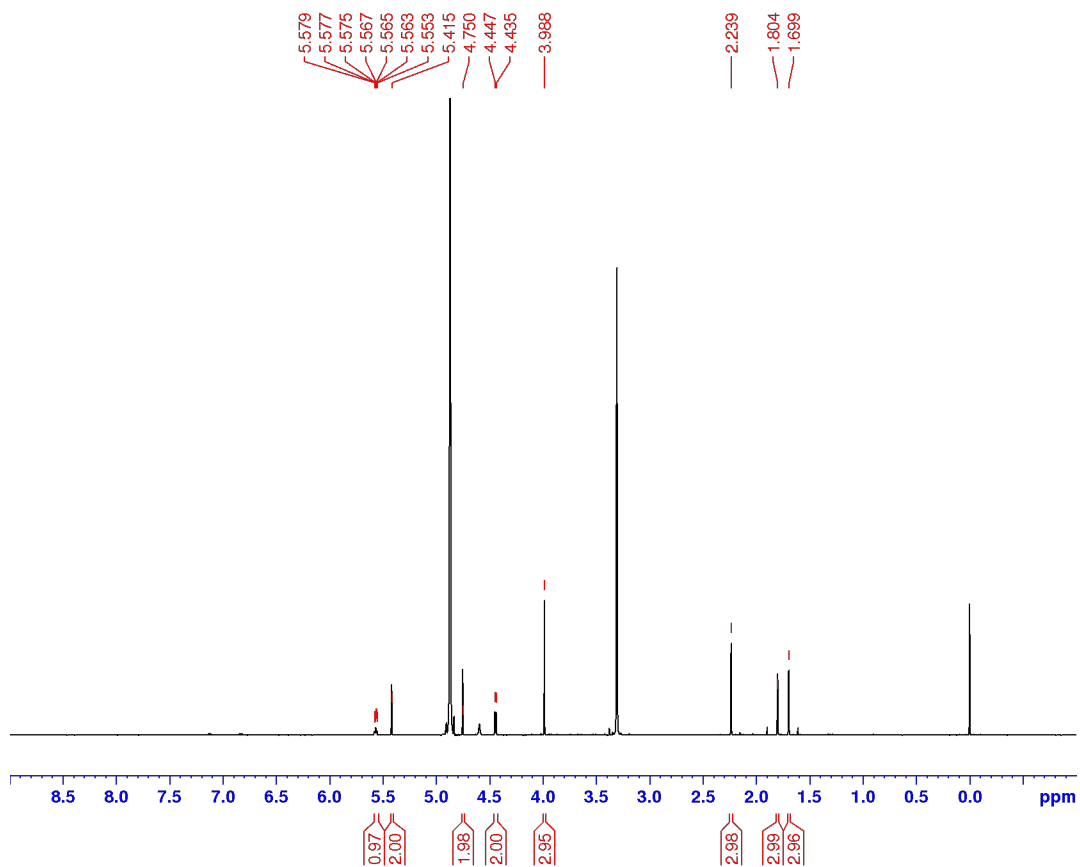

Figure S38.  $^1\text{H}$  NMR spectrum of **8'** in  $\text{CD}_3\text{OD}$  at 600 MHz.

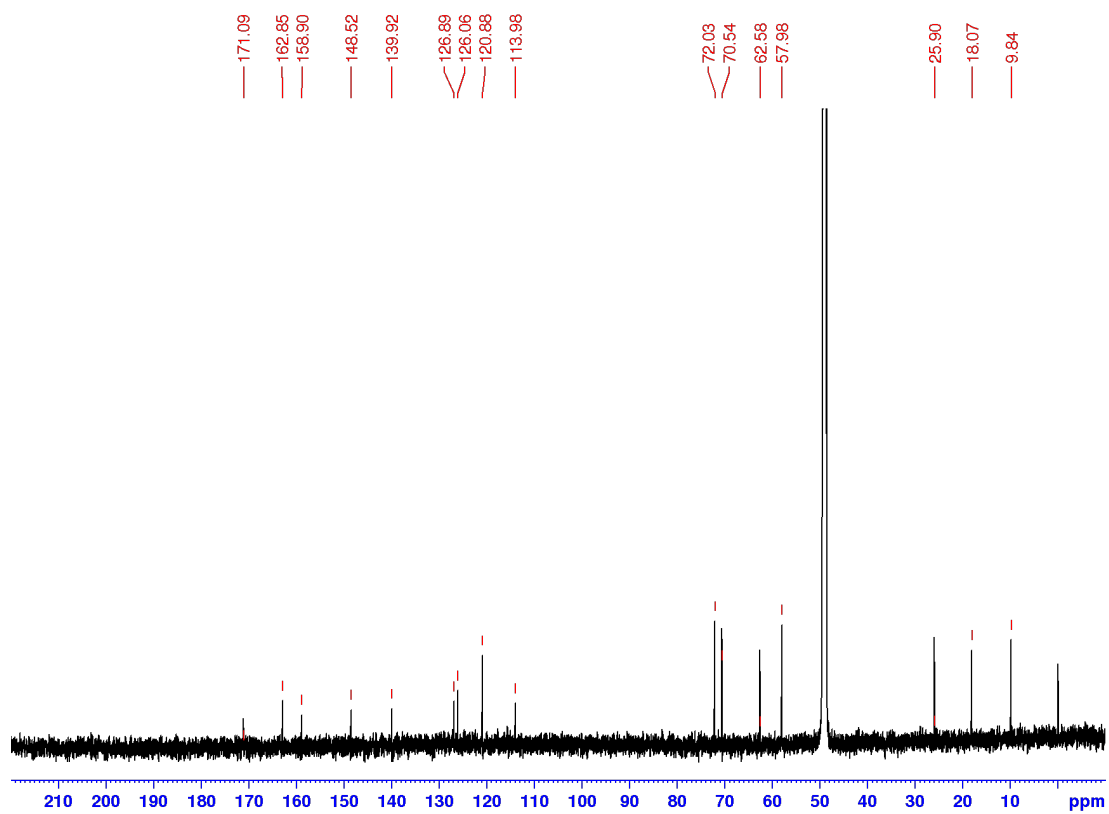

Figure S39.  $^{13}\text{C}\{^1\text{H}\}$  NMR spectrum of **8'** in  $\text{CD}_3\text{OD}$  at 150 MHz.

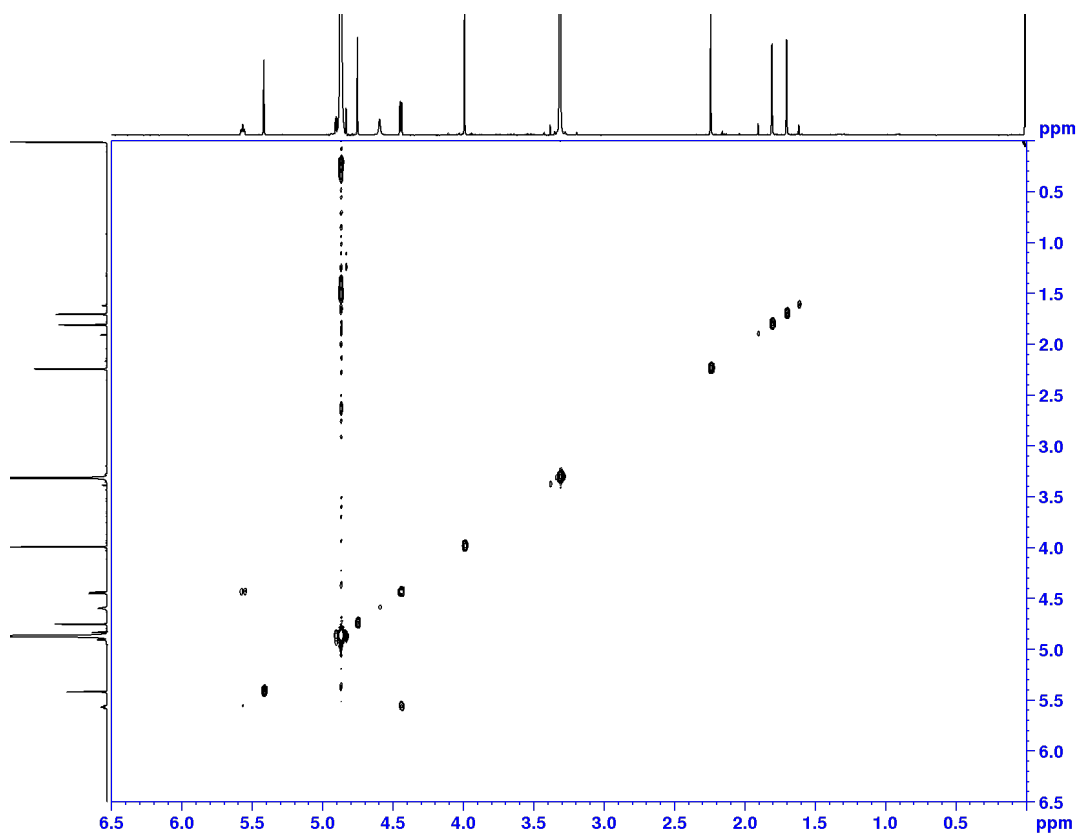

Figure S40. <sup>1</sup>H-<sup>1</sup>H COSY spectrum of **8'** in CD<sub>3</sub>OD.

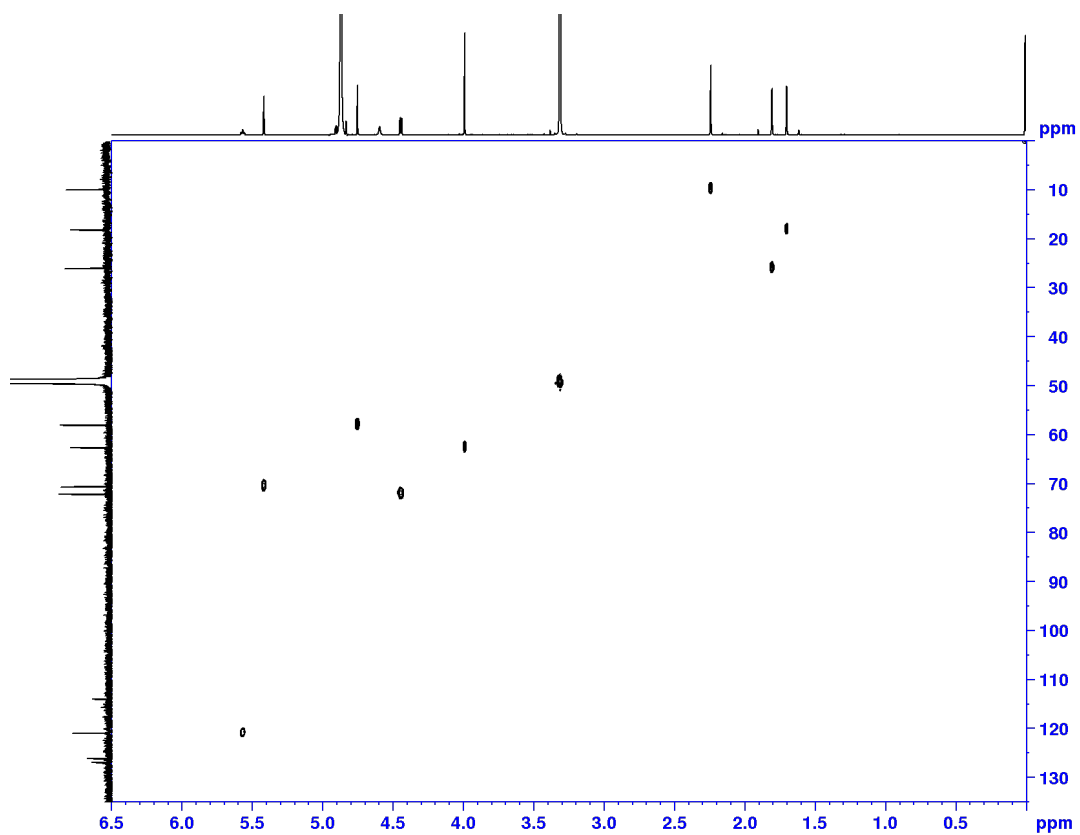

Figure S41. HSQC spectrum of **8'** in CD<sub>3</sub>OD.

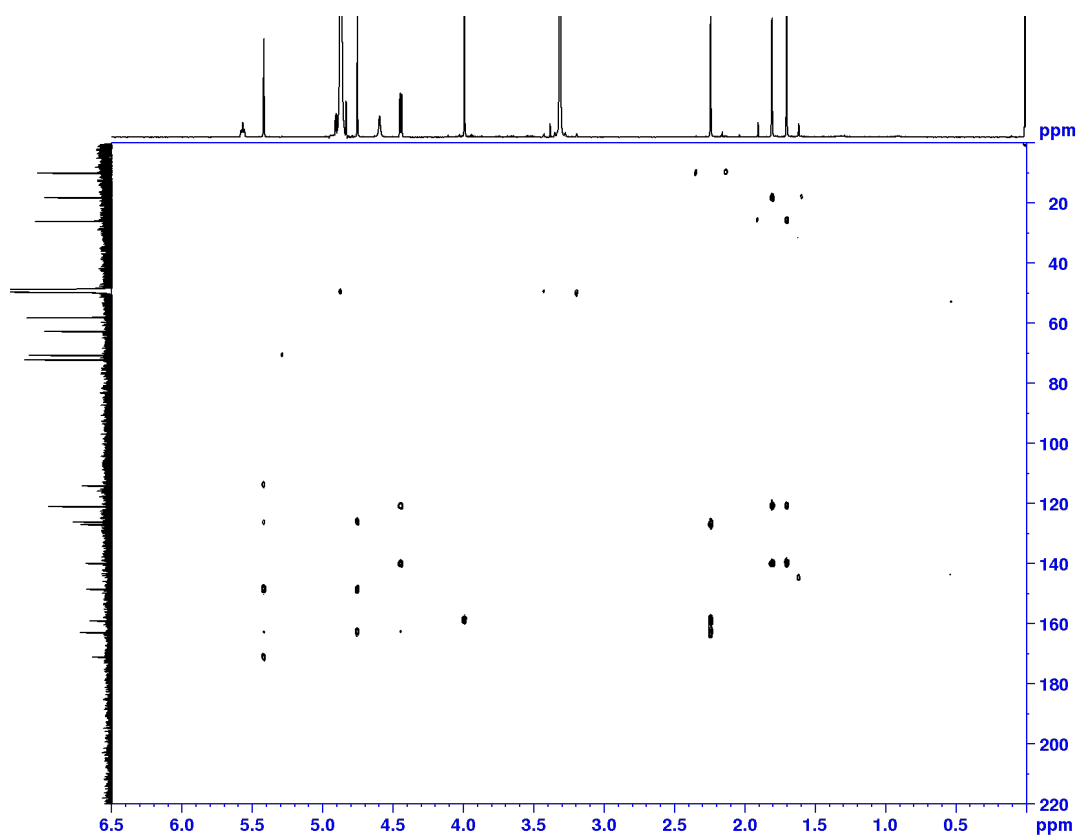

Figure S42. HMBC spectrum of **8'** in CD<sub>3</sub>OD.

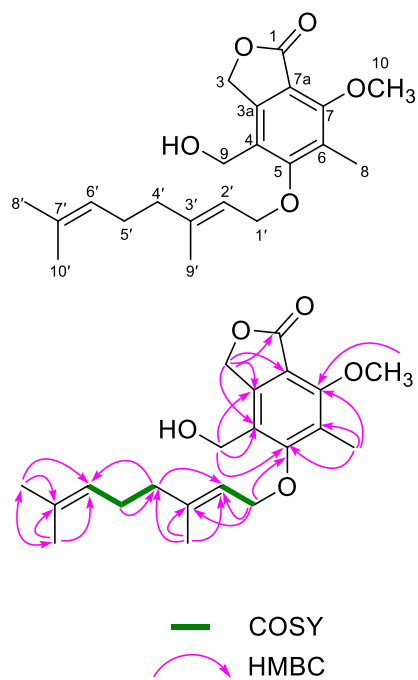

| position | $\delta_C$ , type     | $\delta_H$ , mult. ( $J$ in Hz) |
|----------|-----------------------|---------------------------------|
| 1        | 168.9, C              |                                 |
| 3        | 69.5, CH <sub>2</sub> | 5.40, s                         |
| 3a       | 147.9, C              |                                 |
| 4        | 125.9, C              |                                 |
| 5        | 161.8, C              |                                 |
| 6        | 125.9, C              |                                 |
| 7        | 158.1, C              |                                 |
| 7a       | 113.8, C              |                                 |
| 8        | 9.8, CH <sub>3</sub>  | 2.23, s                         |
| 9        | 57.9, CH <sub>2</sub> | 4.81, d (5.2)                   |
| 10       | 62.2, CH <sub>3</sub> | 4.00, s                         |
| 1'       | 71.5, CH <sub>2</sub> | 4.48, d (7.1)                   |
| 2'       | 120.7, CH             | 5.58, brt (7.2)                 |
| 3'       | 142.2, C              |                                 |
| 4'       | 40.2, CH <sub>2</sub> | 2.11, brt (7.5)                 |
| 5'       | 27.1, CH <sub>2</sub> | 2.13, m                         |
| 6'       | 124.7, CH             | 5.13, brt (7.2)                 |
| 7'       | 132.1, C              |                                 |
| 8'       | 25.8, CH <sub>3</sub> | 1.67, s                         |
| 9'       | 16.5, CH <sub>3</sub> | 1.70, s                         |
| 10'      | 17.7, CH <sub>3</sub> | 1.61, s                         |
| 9-OH     |                       | 4.28, t (5.2)                   |

<sup>1</sup>H NMR: 600 MHz, <sup>13</sup>C NMR: 150 MHz (acetone-*d*<sub>6</sub>)

Figure S43. NMR data of 9'.

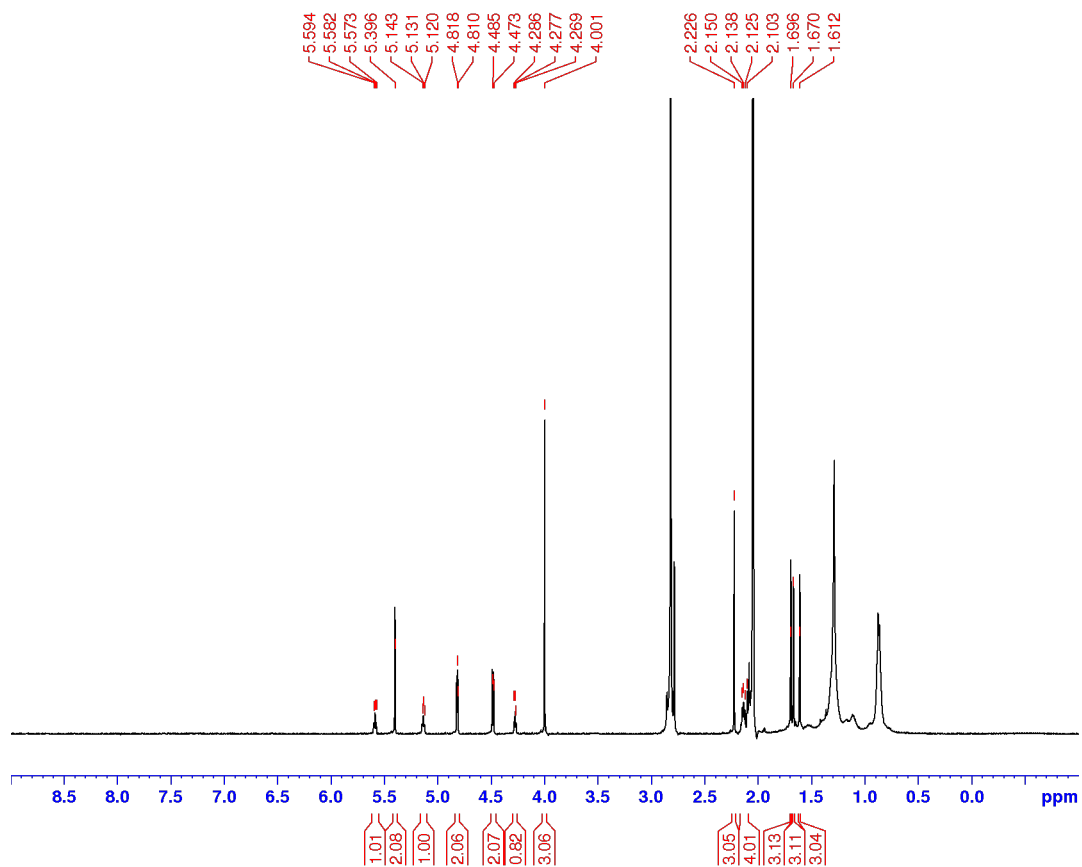

Figure S44.  $^1\text{H}$  NMR spectrum of **9'** in acetone- $d_6$  at 600 MHz.

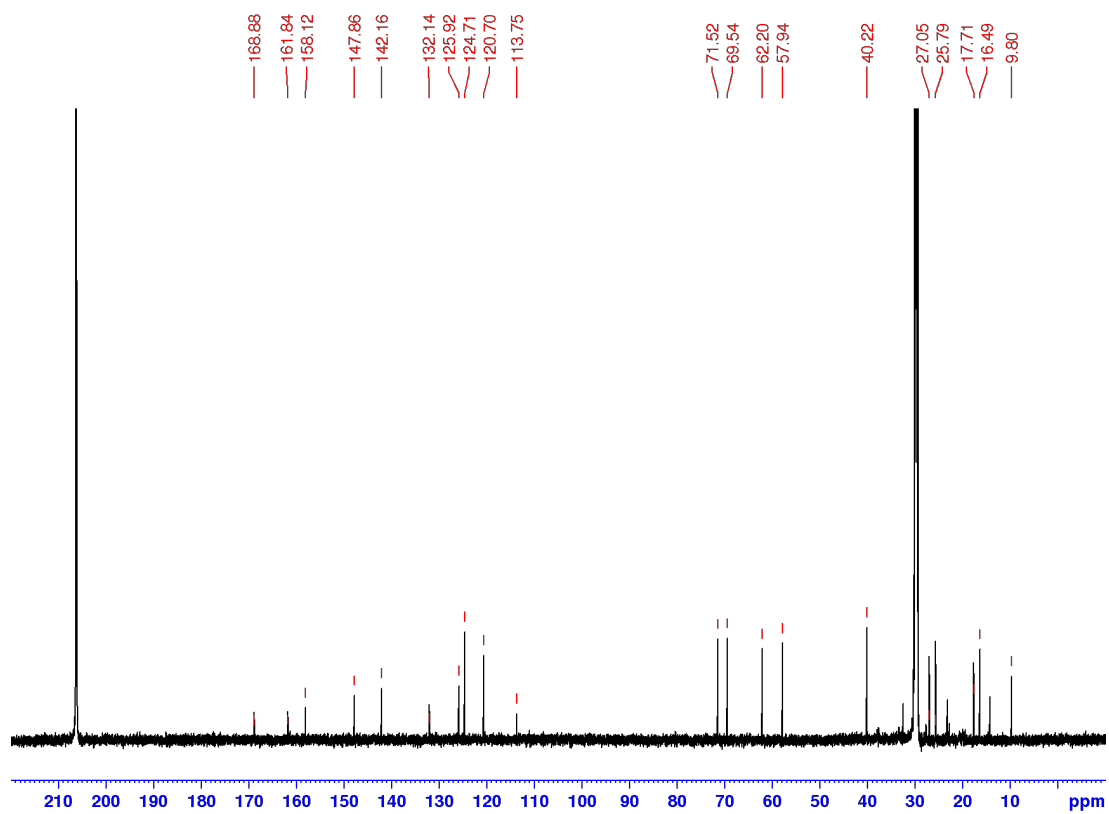

Figure S45.  $^{13}\text{C}\{^1\text{H}\}$  NMR spectrum of **9'** in acetone- $d_6$  at 150 MHz.

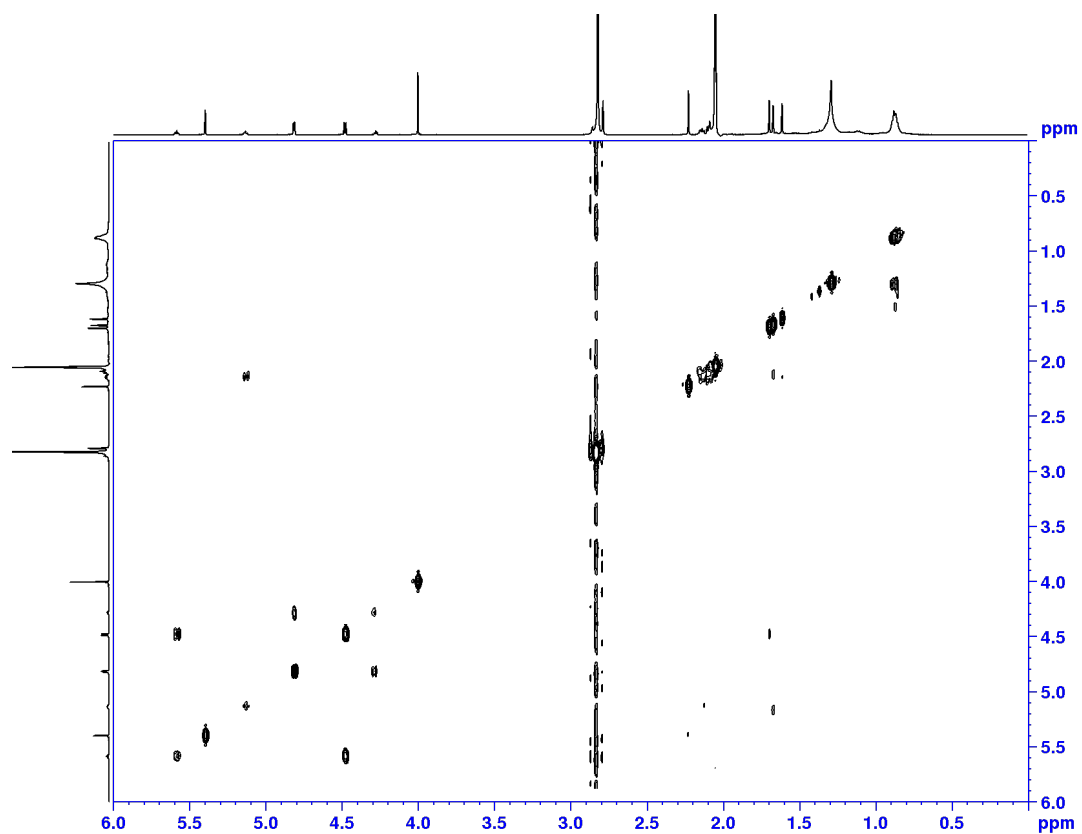

Figure S46.  $^1\text{H}$ - $^1\text{H}$  COSY spectrum of **9'** in acetone- $d_6$ .

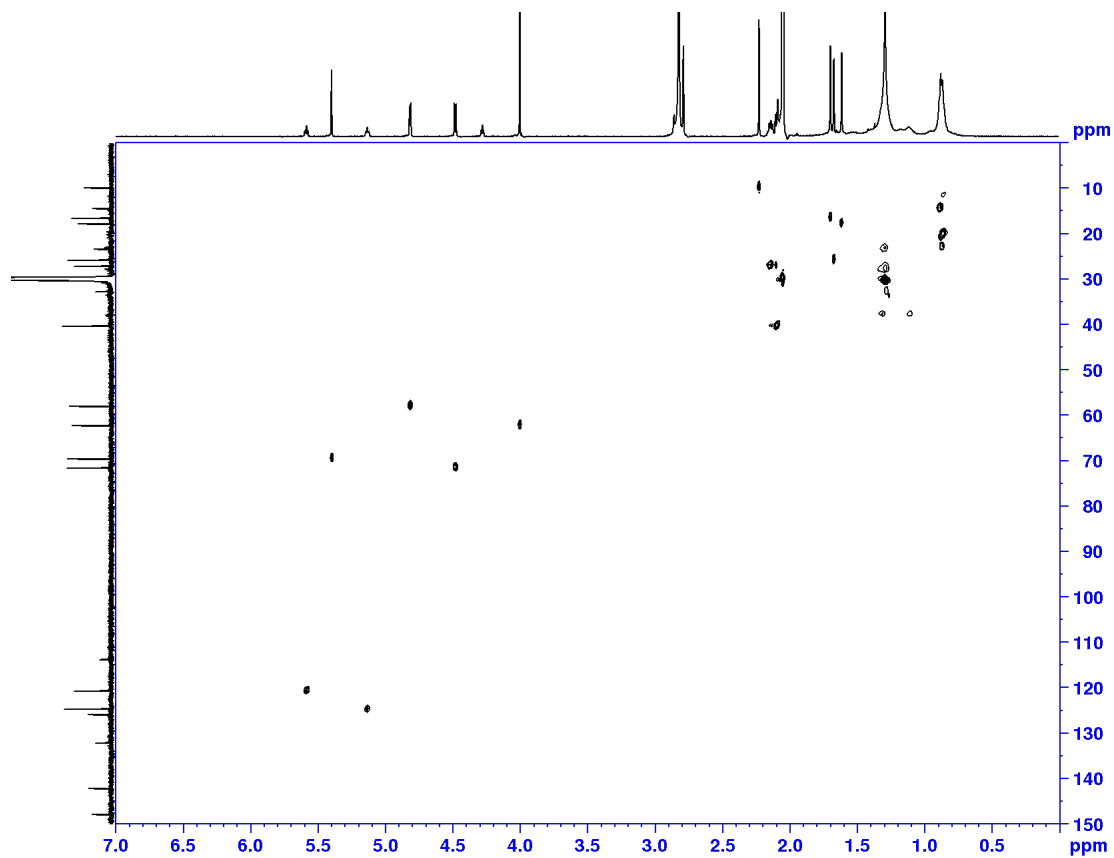

Figure S47. HSQC spectrum of **9'** in acetone- $d_6$ .

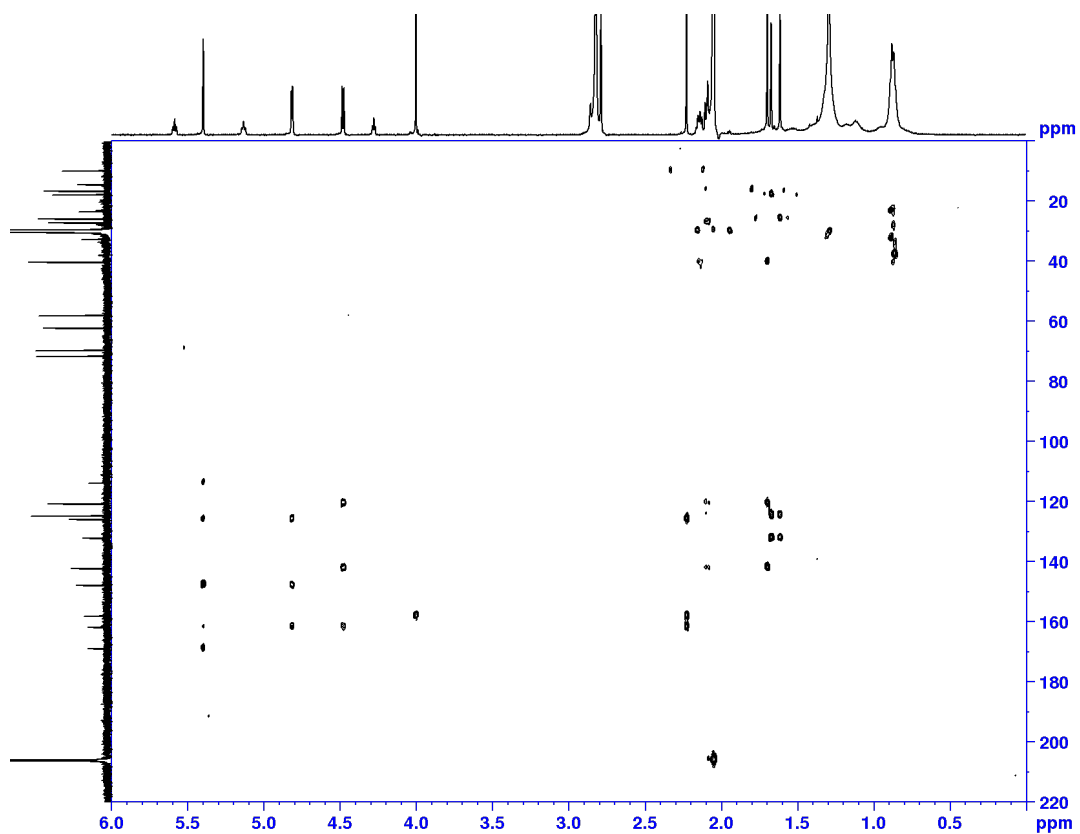

Figure S48. HMBC spectrum of **9'** in acetone-*d*<sub>6</sub>.

## Supplementary Data

### Sequences of known Pyr4 homologues.

>Pru\_AdrI  
MEKSTLLSAVLKHRDALASVAEFLRILAGICWTLNLYFSMLRSTSQKDKIPSTGIFPLCNDIGWEFIYAFIYPKASAHWEGGVRVWFLVHCI  
VIFFIIKNAHNEWDFPLIQRNLYFLYGIVTIGFAIGQYSFAREVGPDLGFFYGGVLCQTLASLGPIAQILSRNSTRGASLLTWLLRAVA  
TFGGFIKLTIIYYLTGNAAGPWFESPMCKFYIGLTLILDFTYPICYVIRRQELVNDEGDKKKKTKSGKAA

>Pro\_AdrI  
MEESLLSAILDHRDALASVAEFLRILAGICWTLNLYFSMLRSTSQKDKIPSTGIFPLCNDIGWEFIYAFIYPTASAHWEGGVRVWFLVHCI  
VIIFFIIKYAHNEWDFPLIQRNLYFLYGIVTIGFAIGQYSFAREVGPDLGFFYGGVLCQTLASLGPIAQILSRNSTRGASLLTWLLRAIA  
TFGGFIKLTIIYYLTGNAAGPWFESPMCKFYIGLTLVLDFTYPICYVIRRQELANAQKEKKEKSK

>AdrI'  
MDASNSAVLEJRDELASVAESLRLSSGVCWTLNLYFSMMYISGRDKVPNTNVFAITNDMAWEFMYAFIHPAASAHWEGGKVVWFLVHCAV  
VLYILKFAPNEWDDVPIVKRNIIYLIYTVSFLGFLAGQWAFAAEVGPDLGFFYGGVLCQTLASLGPNQQLLARNISIRGASLLTWSLRAVAT  
FGGFIIKLTIIYYLTDVPAGPWFESPMCKFYIGLTLVLDVYVFFLYFSVWRQEAARTPSGKKIQ

>At1C  
MGDSTILSAVSEYRDELGAFAEFLRKLKLAGICWTLNLYFSMMYVSGRDKIPNTGIFPLCNDIAWEFVYAFVHPAASAHWEGGKIVWFLVHLA  
VVSYYILKFAPNEWDDVPIKKNHIIYLIYLVVTLGFTAGQLSFAAEVGPDLGFFYGGVLCQTLASLGPIAQILSRNSTRGASILLTWLLRGIA  
TFGGFIKLTIIYFICDTPAGPWFESPMCKFYIGLTLTLDIYPCLYHVIRRQERRIAVEKKEKVK

>Trt1  
MPSIISDPQAYDIMLRLQLQFSCWSLSYINTVRTTSLDQLPSVFSMISCCDVAVEFVYAFVYPIASSHWAGGIRIWFAMHCVMFLIVAKYA  
PNDWDHVPLMKRFARLAYVAITIGFMAGHLALASEIGPALGFFWVGALCQITASLGSLCLLVCRGSTRGASIKTCYFRIIATVGGFTKMS  
IRHIWHLADEPWFDSPLCWFIYIAITLTLDAIYVFFFFYFRAIEHPKDKSERKVE

>An\_AusL  
MSQLTISKIIEEPFSALSSEMLKILAAALGWSTNYLAMVYRTQADKLPAAVLPCCDIAWEFTYAWIYYPQASGHWQGVVRVWFFLHTAV  
LAATLRYAPNDWAGTPLGESRGRVLLYAAVIAAFAAGQLCLALEMGGALGFHWGGALCQFLSSSAAVGQLLTRGHTRGASLLIWGARAI  
STAGGFVKLCIRFQHQVDGAPWLDSPMCWFYIGIVLSLDASYPVLYQLTRRHEEASGGGKSGKVKWN

>Pb\_AusL  
MEEP1TVAAIFRGPFNILAISEVLKVVAAVWGSVNYIGMVHRAWKDQIPSIGILPLCCDIGWEFVYAWMFPDFSSHWQGVVRVWFFLHSA  
VLLVTLKVSNDWANTPLAHRHIVFIYIFVTVIVFGAGQYALAAEIGPALGFHWGGALCQFLSSSGGIAQLLSRGHTRGASYLIWFARAI  
TFAGFIKLCIRFQHNVDGAPWLDSPMCWFYIVTVLSFDAAYPFLYFSMRKFETPAPQREARIKKQ

>Ac\_AusL  
MSHLTVSKILEDPFSALSSEMLKILAAALGWSTNYLAMAHRTHADRLPAIAVLPCCDIAWEFTYAWIYYPQASGHWQGVVRVWFFLHTAV  
LAATLRYAPNDWAGTPLGKSRARLVLLYVAVIGAFAGQLCLALEMGGALGFHWGGALCQFLSSSGAVGQLLTRGHTRGASLIWGARAI  
STAGGFVKLCIRFQHQVDGAPWLDSPMCWFYIGIVLSLDASYPVLYQLTRRHEEASGRGNSGKVKNR

>PrhH  
MEEP1TVAAIFRDPFNILAISEVLKVVAAVWGSVNYIGMVHRAWKDQIPSIGILPLCCDIGWEFVYAWMFPDFSSHWQGVVRVWFFLHSA  
VLLVTLKVSNDWVHTPLGHRHIVFIYIFVTVIVFGAGQYALAAEIGPALGFHWGGALCQFLSSSCGIAQLLSRGHTRGASYLIWFARAI  
TFAGFIKLCIRFQHNVDGAPWLDSPMCWFYIVTVLSFDAAYPFLYSSMRKLETPALRKESTRIKNQ

>InsB2  
MSASDVFIGPDLHTIDI SLRWVAFICWLSNLYISLLGTAIRDRTPSMALLALCSDTGWEIVYGFIFPEASRHFSGSVRVLHHPVYVY  
MLKFGADEWDHNPLVKKNLPLVYVALTFGFGAAQMALANEIGPDLGFFGGVFCQTLII FSHLCQLLSRGSTRGASYSIWFFRCVGFIA  
FSKLI LLDLHGHNVPWLGSPICWFYMAASVVDI IYVCLYFMRREEQSGEQRKKNVD

>InsA7  
MSSTPLSLDNIIEYPIFDYVAITSRALCGICWVITYVLMIHKSFQRTYSIPIITLLFNIGWEFIYTLVYGD TDVRSQGIVRLWPLFNLA  
VLVVTIKFAPNEWESPLVRRNIPLIFVLGLAWSLSGHWALASEMGPGLAFYWSGAGCQIITSVGLLCQLLRCRGSTRGSSYLWFMRLLG  
SSCGYVNRFIMASRGLDKFPFFKSPVMKWMVTVIILDAAYGVCFHIINRQERSRPVTARGKWM

>Pyr4  
MDGWSDLSSAPPQYREVAGIADWALLAQGLGWSINYLAMIYHSYKDRTYGMAILPLCCNFAWEFVYSVIYPSHNSAERAVLTTWMLNLF  
VMYTAIKFAPNEWQHAPLVQRCLPWFVPAIAAFTAGHLALAATVGVSKAANWGAFLCFELLTSGAVCQLMSRGSSRGASYTIWLSRFLG  
SYIGGIFLHVRETHWPQEFGWISHPFVTVHGLMCFSLDIAYVTFWLWIRRQEHRSQRKKAL

>Ppb5  
MDGWSDISSAPAGYKDVVWIADRALLAQGLGWSINYLAMIYQSRKDRTYGMAILPLCCNFAWEFVYTVIYPSQNPFERAVLTTWMLNLY  
LMYTTIKFAPNEWQHAPLVQRILPVI FVPAIAAFTAGHLALAATVGVAKAVNWSAFLCFELLTAGAVCQLMSRGSSRGASYTIWLSRFLG  
SYIGSIFMHVRETHWPQEFDWISYPFVAWHGIMCFSLDISYVGLLWYIRRQERQGLKKAM

>AstH  
MDWFIGAIPPEYQAVAWFANVATIIETIGWAINYGDSIHRSVKDRTYGMAIFPMLNLSWEIVYTVLPCNDTYQWIMIIVTWLLNPGI  
MLCAIRYAPNEWQHAPLVRENIPLI FALTMVACILGQLAAAATLPGVVAATVACFCYLLLTGSLCQLIIRGSSRGTSYTMWASRFIGN  
LAAGFNAHFRVTYWVQVFGFLDTALMKWFVATTTIVELCYIFVLRHIRDKEAASHNTTNLADKKR

>CdmG  
MDYFYGTSPPEYERYASIVDAATLVQGLFWALNYGEASYRSIKDRTYGMAIFPLCCNYAWELVYTVIYSSQNKYERIIMTTWILNLSIM  
MGFTIKFAPNEWHRHAPLVQRNIPFI FLGVAAFVIAQLALAATVGPGLAMNVAALCYLLLTIGSLCQLMTRGSSRGVSYTMWLSRFVGT  
YVGVICVYFRYNYWPQNFVWDEPIMKCFSGISLAVEIVYGVTLWHIRKQERHHIVEKSK

>AndB  
MQPITQIPLTFDVTVNNLLGSASGIGWILNLYILMTYYSFRDKTYSMSMLPLCCNIAWEFVYGILCPSSTFVVRPVIILSWLVNCLVYAAI  
KYSNEWAHAPLVQRHPLPFLFTVGVIAACTGFHIALIRKFDPATAFWLSARSCQVLLSIGGLFQLLCSSTKGGSYVLWLSRFLGSIQCVL



KMTLMWKYGESRFPWLDPLTAYCIALWII SDVLYGVVYSLRSKELAGAGKAKAI  
 >FncH  
 MKTLLKTLSLINSAGWMINYIGMVYLSFKDQTYSMAI IPLCCNVAWEIVYGI IQPSSI I VPRKVI L TWLALNCAVMYAAIKFAPTEWSHA  
 PLV MENLPLIFAIGVAVFIAGHLALAAELGPQTAF LWSARACQTL L SVGALLQLLGRGSTRGASFLVWFSRFFGSACGVVRLSVMYLRGM  
 HSF AWFNSPLTMWCVVLFLLSDMLYGVCFYIIRGRELNPPV  
 >NvfL  
 MDPWIALSSPLTSQTVEYVANTLRIMCAISWNISYMSMAYYSFRDKTYGNALIPLCNNIAWEFVYSFIHCPKLT FVRIENTGWFLLNIVV  
 MYAAIKYSENEWKHAPLVQRNLPFI FAVG I SAMIAGHLALAAQIGPRIAFVWSAKGCQLVLSTGALSQLLSRGSTRGGSYVVWLSRYLGT  
 VFIDVMVTIRHVYRAAGPSWPSSPLLLWFMAVFHLLDWTYGF CFYHIRRQELVSEAAEKDKDK  
 >SetH  
 MDMNSMDFSKAPPGFQEV RWISNILLTTLASGWLVCYIATIRTAFRDRACWMP LIPLSCNLSWELVYVFLYPPRPLPIVTFWMLNLV VV  
 YVAVRFASEPGQHTAAASKRSLAVFFVLGALFWGAGHVALISQVGPLTAFYGGGLCCQIMTSATALCRLVDRGCTTGASYIIWVARVIGT  
 SSALLGVYFRAHYWPELWAWAVNPLMHWCTAAAFVILDGLYGVCFWYIRQSETSQQKVLDAKDK  
 >BrvF  
 MDDMDFSKAPPSFQEV RWISTILLTTLASGWLVCYIISTIAKAFRDRACWMP LIPLSCNLSWELVYVFLYPPRPLPIVTFWLSLNLA VV FV  
 AVKFASGFNKQSAVFSNGALQRGAFFVLATIFWGAGHVALISQVGPLTAFYGGGLCCQIMTSSAALDKLLKAGHTTGASYTIWISRVIGT  
 SSALLGVYFRAYYWPVWAWASNPLMYWTAAFIILDGWYGVAFWNIRRSEKQQQKRHATKKN  
 >OlcD  
 MESLDFTKAPPEFQEV KYLSDILLVTLASGWLVCYFATIRTAFCDRACWMP LPLSCNVAWELVFITLYPPPSPILGFWLLVNLGVIYS  
 ALRFAPSKASHLAVEKHYLPVLFVLAVGFWAWGHLALIEQLNPLPAFYGGMACQLMTSAAALSGLDVQGSTQGASYTIWLSRVIGTSSA  
 LAGLFFRAHYWPSLWAWADNELMRWLA AAFGILDG VYGVQFWRLLRSENQLTIDHAHRKTE  
 >OlcD'  
 MDSLDFTKAPQS FQSVKWI SDTLLFAMAAGWLTCYIATIRTA RRDGACWVPIVPVSCNLAWELVYAILYPPRLLILTAWFTLNLV VVST  
 ALKYSPE SRGSSPLRGYRLHVC FVIVTALWAAGHICLAKVVGPLTAFYGGGLACQIMTSATALCGLVRSKRSSGASWLIWASRVIGT GSA  
 IAGVLFRAHYWPELWAWTMNPLIYWAAAFAIFDGAYGFCFWSVRQAEVRAGIKDD  
 >Cle7  
 MEEGWDFDSSPPSFKVQVQPLLLTLFSLSGTWL INYITTTIRTA YRDRTPGVSLVALTNNLAWELVFALHPPPLPVAKVILRSWLFVDIF  
 VIYTTAKFARSSSISSNAPLLHRYLHLFVLF GILGFFSGHWALS VLLSPIKAFYWSGMMCLVVM SGTALGILVQRGHTRGMSYGMWFSRF  
 VGSIFAVASLFLRSTYWPQVWGWSDNILMRWFAGAFVVDGLYGVCFWYTRRVEQRQRDKVA  
 >Sre3  
 MDAFDLSSAPAEFRAIKPICDMLVIFTGATWVINYIVTVRQIFRDRVCVMP LVCLCCNVAWEITVVLIHRPPYFLLDVFFAMWLSVNMVI  
 VYGSIKVSM EKQLPSPLMHKHLPLI IALTILGFI LGYHALAKMLGPTKAVVWGGMLSQVMSADCLGQILHRGSTHGASWAMWTSRVLGS  
 YSAIAGVWVKS WFWPQQWDFDNALTRWITGISLIMDIMYGCIFWFIWQTEKGAKVQKA  
 >EsdpB  
 MDEFDFNAAPPEFQEI RWMVASIFLISGTGWIVNYVTTIRTA LRDR TSGVTLLSLCNNLAWETVFAVIHRPPH LIAALVITVWLLVNIYV  
 IYVSVKFARESQDVSP LRRHLPVVTLLGFV GFLTGHIALSMHLGPTKALYWGGMICQVTL SASALGLLIQRGHTRGAS PAMWLSRFIAS  
 SFGVPLGFVRAVYWP SAWGWADNILMRWLSGVFFLLDLSYGAIIYHISRSEHEVGASGSKMSKRE  
 >SubB  
 MNAADISRAPP GYLEVAWIADTCKLLMGLGWT TNYAGMIYKSLKDRTYGMALMPLCCNFAWELTYAVIYPFGSRQDKFTHYFGLMLNCGV  
 MYTAVKNAEREWTHAPLVRRNLPFI F IICIAAWTTAHLALALQIGPSHAQAFSAYGCQLLSVGALCQLLSRGSSRGASYFLWFCRFFGS  
 LVLI PQDVLRYQYWRQDHEYMGSPLYIWFVSI FLLLDGSYALCLWYVRRFESEQEEAKKAKSI  
 >DpmaB  
 MNAADISRAPP GYLEVAWIADTCKLLMGLGWT TNYAGMIYKSLKDRTYGMALMPLCCNFAWELTYAVIYPFGSRQDKFTHYFGLMLNCGV  
 MYTAVKNAEREWTHAPLVRRNLPFI F IICIAAWTTAHLALALQIGPSHAQAFSAYGCQLLSVGALCQLLSRGSSRGASYFLWFCRFFGS  
 LVLI PQDVLRYRYWRQDHEYMGSPLYIWFVSI FLLLDGSYALCLWYVRRFESEQEEAKKAKSI  
 >DpfgB  
 MEVADPSRAPPEYKDVAWIADTCKLLMGI GWT TNYVGM IYKSLKDETYAMALMPLCCNFAWELTYALIYPFGSDLEMYVHFSGLMLNCGV  
 MYTAVKNAHREWGHSPLVLRNLPFI F IICVSGFM SGHVALAAQVGP SLAQAWSAYGCQLLSVGGLCQLLCRGRHSRGASYFLWFSRFFGS  
 LVLVPQDILRYKYWRVDHEYMGSPLYIWFVCI FLLLDGSYGI CLWYVRRFERQTAVAHK KKK  
 >DpchB  
 MNVADISQAPEAYRDVVIADTCKLIMGIGWT ANYVGMIRKSLKDQTYAMALLPLCCNFAWELTYAIMYAF TTSLEKYVHFSGLLLNCGV  
 MYTAVKNAPREWEHAPLVQRNLR LIFVLAVAGFASAHVVLAKQVGP ELGQAWSAYACQLLSVGGLCQLLCRGRHSRGASYFLWFSRFFGS  
 LVLVPQDIIRYTYWKEAHEFMGSPMYIWFVTIFLILDGSYGLCLWYVRRFEQQNPAAGK LKK  
 >DpmpB  
 MNIVPLSQAPPEFLEVAWLADACKLLMGVGT ANYIGMIYKSIKDRTYGMALMPLCCNFAWELVYALILPFD SGM EKWHVTGLAFNCGV  
 MYTAIKFAPGEWAHARLVQRHLTWIFIASVAGWMSAHLALAAQLGPSLAQAWSAYGCQLLSVGGLCQLLCRGRHSRGTSYLLWFSRFFGS  
 LVLI PQDILRYKYWRRDHEWMKSPLYLWFVSI FLLLDGSYGILLWYVRRFERETAEAENRKR  
 >DpasB  
 MDVHDLTRAPPEYLEVVVWTDVCKLVMAVGWLSNYIGMIAKSIKEQTYSMALMPLCCNFAWEFTYFFIYPYKVP MERNIHTLAFLLNCGV  
 MYTAVRYGAREWGHAPLVQRNLPVI FVVC IACVWSAHVAFAEQYGPSLAQAVSGFACQILLSAGGTCQLLCRGRHSRGASYKLWLARFMGS  
 FALILPNMLRYKYWRDDHQYIGSPLYIWF LGMFLFLDGSYGFVLWYVRRHEREQVLVAKPKVQ  
 >JanB  
 MDGFDV SQAPREYQAVKPLADL FVLGMGLGWVINYVGMVYTSFKERTYGMAIMPLCCNIAWEIVYCVFHP SKSRVELGVFAMGLLINFGV  
 MYAAIIFSSREWSHAPLVERNLPWIFCIGVLGFLTGH LALAAEIGPSLAYSWGAVVCQLLSVGGLCQLLCRGRSTRGASYTLWLSRFLGS  
 CCTVG FASLRWYWPQSFAWLN SPLVLSLAVFLMVDGSGYGVCFWYVEQYEKSVLMGRATKAM  
 >AceB  
 MDGFDASQAPPEYLAVKPLADL FVLGMGLGWVINYVGMVYVSFKERTYGMAIMPLCCNIAWEVVYSLIYPSKSLVERGVFATGLLINLGV  
 MYAAISFSPQEW SHAPLVERNLPWIFALGTIGFLTGH LALAAEIGHSLAYSWGAVVCQLLSIGGLCQLLCRSSTRGASYTLWYGLSRFL



SWGIWTRMLGTIAAACCFWRIHYWPERFGYAWTPYGKFLLLGSIGSDMVYAAVYVYVQRIEKQLDSLVTKAQKAR  
 >AscF  
 MAFGVEPEPHVTPWFKPVYEATFQFGGVAWTLCYILIAREGMRTKSYGMPLFALANNFAWEMVYALWVVDNAFEKTAMTIWMLIDTPIIY  
 SILKHGVLEWQHAPMVSRLKSLVGLIALCAAHWSWQSWWIGNEMGRDDLEGADLTQMAYWAVSMCQFLVSTMSLMLCVRGHSGGV  
 SWMIWLSRFLGTLIGLNMNYAWAYYTWPEAHEYFMSAPAVFVWGVTTVCDIIYGFVLYHVKSNERELSDGRKVAEADDEQVGGWSKMKT  
 GKN  
 >AlliB  
 MDPTDANGQVTFESREAPLSVAVLGTGIAVCWLANYVGMCKSYQDRTYAMALMPLCCNFAWELVHGFIITPEKNGMWPVAVYVCWSGLNVA  
 VIYTAMKFAPNEWEHAPLVQRNIRYIFAISIVGWITVHLALVIHMGPLAQGGWAMVCQLLLSAGALCQLLVRGSTRGTSFFLWATRFIG  
 TSLCLPHEILRYHYGYTDVIFNSPLGWGTAAFFILDVSYGICLWNIYKYEETHQIKGGGRQKSI  
 >HomoB  
 MAQIDETYSFGLSDDEPWVLTFLRVCTCVGWLANYMGMIYKFRDRTYGMALMPLCCNIACEFVYGVIIHAPDCPLYQIIIFLCWFVLNCA  
 VIVAAIKFAPREWRHAPLVQQNIGWIFALSIVFWTTAHLAIVAQVGATEGAAWSSWFCQLFLSAGCLCQLLIVRGSSRGTSLWIWFARFFG  
 TALSPLPHEVLRYKHGYTNVVVHWSPLGWGGAAFFILDGAFGILLWKIQQSEKAVKGLQRGEVGLDGNKDIIKKSLSK  
 >FumiB  
 MGLIEGLQAALDYLENPTALTATSVSMCLCWLATYAGMVRKSFQDRSYSMPLMPLCCDIAFEFVFSVLYPPTEAPILQYVFGSWMAGSVM  
 VVFATIRFMPNEWKHAPLVQQNILSILAVTILGWMTAHLALVAQFGADDGSAWGGCLCQLLLGAGSLCQLLIVRGSSRGASFFIWLRSRFLG  
 TNLGVLYFTLRFRHGHVIVHWSPLAWSSVIAFLIDSCYGILLWHIRQAEGRDQQQRKAGSEIGPK  
 >XiaE  
 MVWLPPFLIPMSEVPPVTVGAADVSDLLFAAVAGPTALGWMVTVVLAIRQARRDGRGTGIPAYLIAVNIWAEFSLTFLEQTPTQRQINFL  
 WLNVFNFLFAQALRYGPRDYPGLSARTFRWTLAGVLVWASVVVMVGANELHDVDGMYTGMI IQVPLSAAFILMLRRRGSSAGQSMHIAVA  
 KTVGSLFAGLTAVIVYPSHLLQVLVPTVYVVLVDVAYVLLRRTMLREGRLWAFRHPGAGVPGGCRPLPVR  
 >DmtA1  
 MRPHSSKAPRGDMVDGIRMALAAVCGLGWTIAYVLAVRTGVRDKTYCIPLVALAMNICWEFQFVFFRSAEHMSGNSNVEVEGAEVFIGI IW  
 LIVDCGLLYTVFRFGPNEFPYLP RRVFYAGFIVVLGLAYAGIEVLSREFDDGDVVLTSFGMNVAMSGLFLAMLAAARQSSRGQSMGI AVAK  
 FVGTSTCIAWFFDTSVYPGPWLPYCTVACVLLDVAYIAALSAVLRKERGRSOLAGDRPEIRDIERNASL  
 >TylF  
 MSISSTILNNICANSSGTFWLVTYIGI IWRGFKDRSLGMPLVALSANIAWEFLFAFIYI PERQLLHYATIITWLFFDIPIVLQCFLYGAYD  
 THSQFMKKNFRLIFIAAIAICFVILFNLIPELKDTRGVYSGYGQNLMMSILFVDMILRRDDIRGQSLYIATTKLFGTLFAFLTSSFEFFE  
 LTAGVDVFPNINEFLTAI ISSQTYPMTPLIKVIYPIIFVFDALYIVLVYQKSQEKGINPWVRF

## Supplementary References

1. J. Tang and Y. Matsuda, *Chem. Sci.*, 2022, **13**, 10361-10369.
2. R. C. Edgar, *Nucleic Acids Res.*, 2004, **32**, 1792-1797.
3. J. Castresana, *Mol. Biol. Evol.*, 2000, **17**, 540-552.
4. M. N. Price, P. S. Dehal and A. P. Arkin, *PLOS ONE*, 2010, **5**, e9490.
5. A. Stamatakis, *Bioinformatics*, 2014, **30**, 1312-1313.
6. D. Darriba, G. L. Taboada, R. Doallo and D. Posada, *Bioinformatics*, 2011, **27**, 1164-1165.
7. T. Fujii, H. Yamaoka, K. Gomi, K. Kitamoto and C. Kumagai, *Biosci. Biotechnol. Biochem.*, 1995, **59**, 1869-1874.
8. F. Jin, J. Maruyama, P. Juvvadi, M. Arioka and K. Kitamoto, *Biosci. Biotechnol. Biochem.*, 2004, **68**, 656-662.
9. L. Chen, J.-W. Tang, Y. Y. Liu and Y. Matsuda, *Org. Lett.*, 2022, **24**, 4816-4819.
10. Y. Matsuda, T. Bai, C. B. W. Phippen, C. S. Nødvig, I. Kjærboelling, T. C. Vesth, M. R. Andersen, U. H. Mortensen, C. H. Gotfredsen, I. Abe and T. O. Larsen, *Nat. Commun.*, 2018, **9**, 2587.
11. X. Wei, T. Matsuyama, H. Sato, D. Yan, P. M. Chan, K. Miyamoto, M. Uchiyama and Y. Matsuda, *J. Am. Chem. Soc.*, 2021, **143**, 17708-17715.
12. D. R. McMullin, B. D. Green, N. C. Prince, J. B. Tanney and J. D. Miller, *J. Nat. Prod.*, 2017, **80**, 1475-1483.
